# Supplementary material for: Serum perfluoroalkyl acids concentrations and memory impairment in a large cross-sectional study
Source: PubMed Central journal article supplement — BMJ Open. 2013 Jun 6;3(6):e002414. doi: 10.1136/bmjopen-2012-002414 (PMC3686223; doi:10.1136/bmjopen-2012-002414), 2013-06-06
Supplement: bmjopen-2012-002414.draft_revisions.pdf [file bmjopen-2012-002414.draft_revisions.pdf]

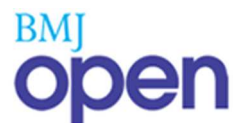

**Serum perfluoroalkyl acids concentrations and memory impairment in a large cross-sectional study**

|                                 |                                                                                                                                                                                                                                                                                                                                                                                                                                                                                  |
|---------------------------------|----------------------------------------------------------------------------------------------------------------------------------------------------------------------------------------------------------------------------------------------------------------------------------------------------------------------------------------------------------------------------------------------------------------------------------------------------------------------------------|
| Journal:                        | <i>BMJ Open</i>                                                                                                                                                                                                                                                                                                                                                                                                                                                                  |
| Manuscript ID:                  | bmjopen-2012-002414                                                                                                                                                                                                                                                                                                                                                                                                                                                              |
| Article Type:                   | Research                                                                                                                                                                                                                                                                                                                                                                                                                                                                         |
| Date Submitted by the Author:   | 27-Nov-2012                                                                                                                                                                                                                                                                                                                                                                                                                                                                      |
| Complete List of Authors:       | Gallo, Valentina; Queen Mary, University of London, Centre for Primary Care and Public Health<br>Leonardi, Giovanni; London School of Hygiene and Tropical Medicine, Social and Environmental Health Research<br>Brayne, Carol; University of Cambridge,<br>Armstrong, Ben; London School of Hygiene and Tropical Medicine, Social and Environmental Health Research<br>Fletcher, Tony; London School of Hygiene and Tropical Medicine, Social and Environmental Health Research |
| <b>Primary Subject Heading</b>: | Epidemiology                                                                                                                                                                                                                                                                                                                                                                                                                                                                     |
| Secondary Subject Heading:      | Neurology                                                                                                                                                                                                                                                                                                                                                                                                                                                                        |
| Keywords:                       | Toxicology < PATHOLOGY, Epidemiology < TROPICAL MEDICINE, Dementia < NEUROLOGY                                                                                                                                                                                                                                                                                                                                                                                                   |
|                                 |                                                                                                                                                                                                                                                                                                                                                                                                                                                                                  |

SCHOLARONE™  
Manuscripts

Only

1  
2  
3 **Serum perfluoroalkyl acids concentrations and memory impairment in a large cross-sectional**  
4 **study**  
5

6 Valentina Gallo<sup>1,2</sup>, Giovanni Leonardi<sup>1</sup>, Carol Brayne<sup>3</sup>, Ben Armstrong<sup>1</sup>, Tony Fletcher<sup>1</sup>  
7  
8  
9

- 10  
11  
12  
13 1. Social and Environmental Health Research, London School of Hygiene and Tropical Medicine, London  
14 (UK)  
15 2. Centre for Primary Care and Public Health, Blizard Institute, Queen Mary, University of London,  
16 London (UK)  
17 3. University of Cambridge, Cambridge (UK)  
18  
19  
20  
21  
22

23 **Please send the correspondence to:**  
24

25 Dr Valentina Gallo, MD, MSc, PhD  
26 London School of Hygiene and Tropical Medicine  
27 Faculty of Public Health and Policy  
28 15-17 Tavistock place  
29 WC1H 9SH London  
30 Tel +44/(0)20/7927 2779  
31 Email: valentina.gallo@lshtm.ac.uk  
32  
33  
34  
35  
36  
37  
38  
39  
40

41 **Key words:** memory disorders [MeSH], prefluoroalkyl acids, perfluorooctanoic acid [MeSH], C8  
42 Health Panel Study  
43

44 **Running title:** perfluoroalkyl acids and memory impairment  
45

46 **Word count:** 3,160  
47  
48  
49  
50  
51  
52  
53  
54  
55  
56  
57  
58  
59  
60

## Summary

### Article focus

- Cross-sectional association between serum level of Perfluorooctanate (PFOA), perfluorooctane sulfonate (PFOS), perfluorononanoic acid (PFNA) and perfluorohexane sulfonate (PFHxS) and self-reported memory impairment in a population exposed to high levels of PFOA
- Potential interaction between the association of perfluoroclorinated compound with memory impairment by diabetes status

### Key Message

- Inverse associations between PFOS and PFOA and memory impairment were highly statistically significant suggesting a potential antiinflammatory effect exerted through PPAR agonism. Comparable inverse associations with PFNA and PFHxS were of borderline statistical significance
- Inverse associations of PFAAs with memory impairment were weaker or non-existent in diabetics than overall in non-diabetics. Analysis further stratified by specific diabetes medication use showed no variation in odds ratios more than explicable by chance given the number of tests made.

### Strengths and limitations

- Very large sample size including 21,024 adults with measured serum level of perfluorinated compounds with a given geographical distribution allowing some multilevel modelling
- The cross-sectional nature of the design does not allow any causal inference and makes results particularly prone to reverse causality
- Self-reported is not an optimal method for estimating the degree of memory impairment in a population

**ABSTRACT**

**Objectives** – To examine the cross-sectional association between serum PFOA, PFOS, PFNA, and PFHxS concentrations with self-reported memory impairment in adults and the interaction of these associations with diabetes status

**Design** - Cross-sectional study

**Setting** – Population-based in Mid-Ohio Valley, West Virginia following contamination by a chemical plant

**Participants** - The C8 Health Project collected data and measured serum level of prefluoroclorinated compounds of 21,024 adults

**Primary and secondary outcome measures** – Self-reported memory impairment as defined by the question “have experienced short term memory loss?”

**Results** - A total of 4,057 subjects self-reported short-term memory impairment. Inverse associations between PFOS and PFOA and memory impairment were highly statistically significant with fully adjusted OR=0.93 (95% C.I. 0.90-0.96) for doubling PFOS and OR=0.96 (95% C.I. 0.94-0.98) for doubling PFOA concentrations. Comparable inverse associations with PFNA and PFHxS were of borderline statistical significance. Inverse associations of PFAAs with memory impairment were weaker or non-existent in diabetics than overall in non-diabetics.

**Conclusion** - An inverse association between PFAA serum levels and self-reported memory impairment has been observed in this large population-based, cross-sectional study stronger and more statistically significant for PFOA and PFOS.

## INTRODUCTION

Perfluoroalkyl acids (PFAAs) are man-made compounds used during the manufacture of fluoropolymers including non-stick cookware and breathable, yet waterproof, fabrics. They can also result from the metabolism of fluorinated telomers, compounds used for food package coatings, carpet treatments, and stain-resistant fabric treatment. Perfluorooctanate (PFOA), perfluorooctane sulfonate (PFOS), perfluorononanoic acid (PFNA) and perfluorohexane sulfonate (PFHxS) persist in the environment and are found in the blood of humans and many animal species throughout the world<sup>1,2</sup>. Potential sources of exposure to PFAAs in humans include drinking water, dust, breast milk, food packaging, ambient air, and occupational exposure<sup>3-6</sup>.

In animal models, perfluoroalkyl chemicals can activate peroxisome proliferator-activated receptor alpha (PPAR $\alpha$ ), a ligand-activated transcription factor that regulates gene expression, lipid modulation, glucose homeostasis, cell proliferation and inflammation<sup>7,8</sup>. The PPAR receptor has been involved in the ageing process: PPAR $\alpha$  null mice showed a decreased longevity compared with the wild-type due to non-neoplastic spontaneous ageing lesions which occurred with a higher incidence and a short latency in the PPAR $\alpha$  null mice<sup>9</sup>. Also PPAR $\gamma$  variants were reported to be associated with longevity in humans with low insulin resistance<sup>10,11</sup>. Activation of the PPAR $\gamma$  receptor *in vitro* and *in vivo* also prevents the expression of inflammatory cytokines and other inflammatory mediators in brains of Alzheimer disease animal models<sup>12,13</sup>. In addition, PPAR $\gamma$  agonists have been demonstrated to suppress the A $\beta$ -mediated activation of microglia *in vitro* and prevent cortical or hippocampal neuronal cell death<sup>14-16</sup>. PPAR $\gamma$  is also deeply involved in diabetes, given its ability to orchestrate the expression of genes involved in lipid metabolism, adipogenesis, and inflammation. It is activated by endogenous ligands (such as fatty acids and prostaglandins) or drugs such as thiazolidinedione. It is most highly expressed in adipocytes where it acts as the master regulator of adipogenesis via induction of adipogenic genes<sup>17</sup>. Therefore, in line with what was recently observed by Power et al<sup>18</sup>, we hypothesised that increased exposure to PFAA could be associated with a better cognitive function.

The positive association between diabetes and cognitive impairment is well established<sup>19</sup>; some studies investigating the association between PFOA exposure and diabetes suggested the presence of an inverse association: a negative trend in diabetes occurrence by increasing serum PFOA deciles was found in a case-control study nested in a previous study based on the population investigated here<sup>20,21</sup>.

1  
2  
3 From 1950-2005, a chemical plant in the Mid-Ohio Valley, West Virginia was responsible for emitting  
4 PFOA into the surrounding environment. In 2001, a group of residents from the nearby West Virginia  
5 and Ohio communities filed a class action lawsuit alleging health damage from drinking water  
6 supplies drawing on PFOA-contaminated groundwater<sup>22</sup>. Part of the pre-trial settlement of the class  
7 action lawsuit included a baseline survey, the C8 Health Project, conducted in 2005-2006, that  
8 gathered data from over 69,000 people from six contaminated water districts surrounding the plant  
9  
10  
11  
12  
13  
14  
15  
16  
17  
18  
19  
20  
21  
22  
23  
24  
25  
26  
27  
28  
29  
30  
31  
32  
33  
34  
35  
36  
37  
38  
39  
40  
41  
42  
43  
44  
45  
46  
47  
48  
49  
50  
51  
52  
53  
54  
55  
56  
57  
58  
59  
60

From 1950-2005, a chemical plant in the Mid-Ohio Valley, West Virginia was responsible for emitting PFOA into the surrounding environment. In 2001, a group of residents from the nearby West Virginia and Ohio communities filed a class action lawsuit alleging health damage from drinking water supplies drawing on PFOA-contaminated groundwater<sup>22</sup>. Part of the pre-trial settlement of the class action lawsuit included a baseline survey, the C8 Health Project, conducted in 2005-2006, that gathered data from over 69,000 people from six contaminated water districts surrounding the plant<sup>22</sup>. In this population, PFOA concentrations ranged from US background levels to very high; overall PFOA levels are much higher in this population (geometric mean 42.6.0 ng/mL, 95% C.I. 41.8-43.3) than in the corresponding US population surveys (NHANES in same year mean 3.95 ng/mL, 95% C.I. 3.65-4.27)<sup>1,22</sup>. The mean PFOS (geometric mean 22.4, 95% C.I. 22.2-22.6), PFNA (1.37, 95% C.I. 1.36-1.38), and PFHxS (3.18, 95% C.I. 3.15-3.22) closely resembled values from a nationally representative US sample from a similar time frame (mean PFOS 20.7, 95% C.I. 19.2-22.3; mean PFNA 0.97, 95% C.I. 0.82-1.14; and PFHxS 1.93, 95% C.I. 1.73-2.16)<sup>1</sup>.

The present study uses these data to examine the cross-sectional association between serum PFOA, PFOS, PFNA, and PFHxS concentrations with self-reported memory impairment in adults, and its potential interaction with diabetes status.

## METHODS

### The Study population

This study is one of the C8 Science Panel Studies and uses information from questionnaires and blood tests collected in the C8 Health Project, supplemented by further information on classification by water district developed in a companion C8 Science Panel Study.

The C8 Health Project enrolled eligible subjects between August 2005 and August 2006. Individuals were eligible to participate in the C8 Health Project if they had consumed water for at least one year between 1950 and December 3, 2004 while living, working, or going to school in one of the following six water districts: Little Hocking Water Association of Ohio; City of Belpre, Ohio; Tupper Plains–Chester District of Ohio; Village of Pomeroy, Ohio; Lubeck Public Service District of West Virginia; Mason County Public Service District of West Virginia; or private water sources within aforementioned districts and areas of documented PFOA contamination. Details of the study enrolment process, including consenting procedures, have been described elsewhere<sup>22</sup>.

1  
2  
3 The C8 Health Project collected data on 69,030 people. While it is not possible to estimate the  
4 participation rate for the C8 Health Project as it is not possible to estimate the number of total  
5 possible participants over 50 years of environmental contamination, a participation rate, based on  
6 US census counts of residents in the affected water districts during Project enrolment, have been  
7 estimated at around 80%<sup>22</sup>. In this population, the strongest predictor of PFOA serum concentration  
8 was residence in one of the contaminated water districts<sup>23</sup>; serum levels of other PFAAs do not  
9 show such geographic variation. Of the population, 21,724 older adults (aged  $\geq 50$  years) were  
10 considered for this analysis, and a total of 21,024 (96.8%) were included in the final analysis after  
11 exclusion of subjects with missing data on ethnicity, education level, socio-economic status,  
12 cigarette smoking, or BMI measurements.  
13  
14  
15  
16  
17  
18  
19  
20

### 21 **Memory impairment definition**

22 During the survey, all participants were asked if they “had experienced short term memory loss”, the  
23 possible answers being “frequently”, “sometimes”, “rarely”, and “never”. Memory impairment was  
24 defined as reporting short-term memory loss frequently or sometimes. Severe memory impairment  
25 was defined as reporting frequent episodes of short term memory loss.  
26  
27  
28  
29  
30  
31

### 32 **Laboratory analysis**

33 Blood samples were obtained and processed at individual data collection sites. Samples were drawn  
34 into four tubes per participant, with a maximum 35 mL. Tubes were spun, aliquoted, and  
35 refrigerated until shipping. Samples were shipped on dry ice daily from each data collection site to  
36 the laboratory daily<sup>22</sup>. Participants were not asked to fast before blood sample withdrawal, but  
37 fasting status was recorded.  
38  
39  
40  
41

42 Laboratory analysis of PFAAs used an automated solid-phase extraction combined with reverse-  
43 phase high-performance liquid chromatography<sup>24</sup>. Analyses were conducted by the Exygen Research  
44 Inc., State College, PA, USA; an intra-laboratory quality assurance program was carried out by  
45 analysis of duplicate samples at AXYS Analytical Service Ltd., Sidney, BC, Canada<sup>22</sup>. The intra-  
46 laboratory coefficient of variation for both PFOA and PFOS measurements was 0.1; the inter-  
47 laboratory comparison coefficient of variation was 0.2 for PFOA and 0.1 for PFOS<sup>22</sup>. The detection  
48 limit for PFOA and PFOS was 0.5 ng/mL and observations below this limit were assigned a value of  
49 0.25 ng/mL ( $n=32$  and  $n=230$  for PFOA and PFOS, respectively, for this study population). Both PFOA  
50 and PFOS concentration distributions were skewed to the right. Methods and results are reported  
51 according to STROBE-ME recommendations<sup>25</sup>.  
52  
53  
54  
55  
56  
57  
58  
59  
60

### Statistical analysis

Associations between exposure (serum concentration of PFOA, PFOS, PFNA, and PFHxS) and memory impairment were studied using logistic regression. Minimally adjusted models included age, in one year age-band, race (white, black, and others), gender, and educational level (high school diploma or general educational development (GED), some college, bachelor degree or higher) (Model 1). Further adjusted models additionally included average household income ( $\leq$ \$10,000, \$10,001-20,000, \$20,001-30,000, \$30,001-40,000, \$40,001-50,000, \$50,001-60,000, \$60,001-70,000,  $>$ \$70,000), physical activity, alcohol consumption (none,  $<$ 1 drink/month,  $<$ 1 drink/week, few drinks/week,  $>$ 1 drink/day) and cigarette smoking (never smoker, former smoker, current smoker  $<$ 10 cigarettes/day, current smoker 10-19 cigarettes/day, current smoker  $\geq$ 20 cigarettes/day) (Model 2). Fully adjusted models included also body mass index (BMI) (underweight/normal weight; overweight; and obese class I, II, and III), and diabetes (Model 3). PFAA concentrations were log-transformed to reduce skewness. For each model the association between PFAAs and self-reported memory impairment was calculated for a doubling in PFAA concentration in a model with PFAA entered as numerical covariate and for quintile groups of the PFAA distribution. To explore possible differential effect of PFAA in sub-groups, analyses were further stratified by diabetes status and, among diabetics, by type of medications.

Four sensitivity analyses were carried out: firstly one analysis restricting the sample to 7,097 subjects aged 65 years and older. Secondly, an analysis conducted on the entire sample, but using as outcome definition only those reporting frequent episodes of memory loss. Third, an ordinal regression analysis with the outcome variable comprising the four original levels of self-reported frequency of episodes of memory loss. Fourth, we also considered the possibility that mobility (i.e. moving house measured as number of address during lifetime) might be associated with both memory loss and C8 and hence confound the association.

Finally, the geographical clustering of PFOA in water districts allowed use to decompose the overall estimate of association of PFOA with memory impairment into within and between water district components, by including as explanatory variables both water district mean logged PFOA serum concentration and potential deviations of individual's values from their district mean<sup>26</sup>. These two associations are subject to different biases, so help interpretation.



### Role of funding

Funding for this work, the “C8 Science Panel Community Study at London School of Hygiene and Tropical Medicine - LSHTM”, comes from the C8 Class Action Settlement Agreement (Circuit Court of Wood County, WV, USA) between DuPont and plaintiffs, which resulted from releases of perfluorooctanoate (PFOA, or C8) into drinking water. It is one of the C8 Science Panel Studies undertaken by the Court-approved C8 Science Panel established under the same Settlement Agreement. The task of the C8 Science Panel, of which Tony Fletcher is a member, is to undertake research in the Mid-Ohio Valley, and subsequently evaluate the results along with other available information to determine if there are any probable links between PFOA and disease. Funds were administered by the Garden City Group (Melville, NY) that reports to the Court. The authors of this manuscript declare that their ability to design, conduct, interpret, or publish research was unimpeded by and fully independent of the court and/or settling parties. In addition, they declare no competing financial interests. The LSHTM Ethics Committee approved this study.

### RESULTS

A total of 4,462 subjects (21.2% of the entire population of 21,024 individuals aged 50 years or older) self-reported short-term memory impairment (**Error! Reference source not found.**): episodes of short-term memory loss were reported frequently by 1,115 subjects (5.3%); sometimes by 3,347 (15.9%); rarely by 4,283 (20.4%) and never by 12,279 (58.4%). Many personal characteristics were associated individually with memory loss, including higher age, lower socio-economic status, smoking, and diagnosis of diabetes (Table 1), though to what extent these reflected independent risk factors was not investigated.

Results from the logistic regression of association between PFAAs and memory impairment are shown in Table 2. Results for minimally, further and fully adjusted models were similar, so we show only further adjusted results in this table, but results for all models are in the on-line Table 1. Inverse associations between PFOS and PFOA and memory impairment were highly statistically significant with adjusted OR=0.93 (0.90-0.96) for PFOS and OR=0.96 (0.94-0.98) for PFOA for doubling PFAA concentrations. Inverse associations of similar magnitude with PFNA and PFHxS but of borderline statistical significance were found: OR=0.96 (0.92-1.02) for PFNA and OR=0.97 (0.94-1.00) for PFHxS. The analysis by PFAA quintile groups shows similar patterns.

1  
2  
3 Inverse associations of PFAAs with memory impairment were weaker or non-existent in diabetics  
4 than overall in non-diabetics (Table 3), though odds ratios were imprecise so this pattern was only  
5 significant for PFOA (p-value for interaction = 0.014). Analysis further stratified by specific diabetes  
6 medication use showed no variation in odds ratios more than explicable by chance given the number  
7 of tests made (on-line Table 2).  
8  
9

10  
11 In the sensitivity analysis on subjects older than 65 years, the substantial reduction of the sample  
12 size resulted in loss of precision in odds ratios. However, there were associations of comparable  
13 magnitude in memory impairment with all PFAAs except for PFOA for which the association with  
14 memory impairment virtually disappears (OR= 0.99 (0.97-1.03)) (Table 4).  
15  
16

17  
18 The analysis carried out on the entire sample, but restricting the definition of memory impairment  
19 to those who report frequent short-term memory loss episodes shows substantially unaltered  
20 associations for PFOA and PFNA, and somewhat reduced inverse associations for PFOS and PFHxS,  
21 but precision was reduced (Table 4). Analyses using ordinal regression in place of binary logistic  
22 regression gave similar results (Table 2, Table 3, and Table 4).  
23  
24  
25  
26

27  
28 Mobility as indicated by count of addresses was not appreciably associated with C8, so results  
29 changed very little on inclusion this variable in our regression analysis and are not shown.  
30  
31

32 The analysis separating the PFOA-memory impairment association into within and between water  
33 district components found that within water districts individuals with high PFOA tended to have less  
34 memory impairment, as in the overall association (OR 0.94, 95%CI 0.91-0.98, scale and adjustments  
35 as before). However there was no tendency for water districts with high PFOA on average to a lower  
36 proportion of persons with memory loss (OR 1.00, 95%CI 0.97-1.03).  
37  
38  
39

40  
41 Extra data is available upon request by emailing Valentina Gallo (v.gallo@qmul.ac.uk).  
42  
43  
44  
45

## 46 **DISCUSSION**

47  
48 An inverse association between PFAAs serum levels (including PFOS, PFOA, PNA, and PFHxS) and  
49 self-reported memory impairment has been observed in this large population-based, cross-sectional  
50 study. This association is stronger and more statistically significant for PFOA and PFOS.  
51  
52

53  
54 It could be speculated that this effect might be mediated by the activation of the PPAR receptor by  
55 PFAAs. Activation of the PPAR receptors has been shown to decrease the secretion of proinflammatory  
56 cytokines and possibly increase phagocytosis of A $\beta$  inclusions, probably thought activation of  
57  
58  
59  
60

1  
2  
3 microglia<sup>27</sup>. However there was suggestion that this effect of suppression of the activation of  
4 microglia was age-dependent or disease stage-dependent being not significant in patients with  
5 advanced AD<sup>28 29</sup>. PPAR agonist drugs, such as non-steroidal anti-inflammatory drugs (NSAID) and  
6 some anti-diabetics (i.e. thiazolidinedione or pioglitazone) have been proposed as preventive drugs  
7 for neurodegenerative conditions, including Alzheimer dementia<sup>27 30</sup>.

8  
9  
10  
11 In the present study, the inverse association between PFAAs and cognitive impairment was more  
12 evident in those without than with diabetes. This could be at least partially due to the fact that in  
13 diabetics PPAR receptors are more phosphorylated with a consequent reduced transcriptional  
14 activity<sup>31 32</sup>, and the balance between PPAR $\gamma$  expression and activity levels is altered<sup>31 33</sup>. It is  
15 therefore reasonable to assume that the PPAR-agonist effect of PFAAs is different in subjects with  
16 and without PPAR-mediated metabolic changes such as diabetes. Also, it has been reported that  
17 PFAAs have a PPAR agonist effect, more prominently PPAR- $\alpha$ <sup>34</sup>; animal models suggest that PFOA  
18 has a stronger agonistic effect than PFOS<sup>34</sup>. Taken all together these results are compatible with an  
19 inverse association between PFAA and memory impairment among non-diabetics, and would be  
20 therefore compatible with a possible anti-inflammatory role exerted by PFAA on early symptoms of  
21 cognitive impairment.

22  
23  
24  
25  
26  
27  
28  
29  
30  
31 That the association with PFOA was entirely within water districts, and not present at all between  
32 water districts despite large differences in (geometric) mean PFOA between districts (range 15.7 –  
33 405.1) helps shed light on which biases the results are most vulnerable to. The between district  
34 estimate is not vulnerable to reverse causation and related biases at individual level, making this a  
35 more plausible explanation of the results. This association is, however, subject to bias by “ecologic”  
36 confounding by unmeasured factors differing across districts. This suggests that either the  
37 association documented at individual level could be confounded (e.g. by a common genetic variant  
38 related to both dementia risk and some excretion pathways); or that the association at the district  
39 level is biased towards the null (e.g. by confounding by socio-economic status). The notion that the  
40 association estimates found for PFOA are in the same direction of those found for PFNA and PFHx,  
41 and in the majority of cases very consistent with those found for PFOS, however, tend to reinforce  
42 the notion of an inverse association between PFOA (and other PFAAs) and memory impairment at  
43 individual level. This suggests a common biological mechanism behind the findings.

44  
45  
46  
47  
48  
49  
50  
51  
52  
53  
54  
55  
56  
57  
58  
59  
60  
60 Another alternative explanation of these findings is that the association between PFAAs and memory  
impairment is confounded by drinking water as inversely related to drinking artificially sweetened  
soft drinks. Fructose, currently the most used sweetener used in drinks as well as in a wide range of  
packaged food, has been associated with higher risk of dementia<sup>35</sup>. Assuming that the consumption

1  
2  
3 of water (contaminated by PFOA in this population case) is inversely related to the consumption of  
4 soft drinks, this would lead to an artificial association between PFOA and memory impairment.  
5  
6 However, indirect evidences gathered mainly during intervention trials among adolescents suggest  
7 that soft drink consumption is independent from the amount of water consumed by individuals<sup>36 37</sup>.  
8  
9 Also, if this was true one would expect that the pattern observed for PFOA to be substantially  
10 different from those observed for the other PFAAs, which is not in this case.  
11

12  
13 However, these findings should also be interpreted cautiously given the several limitations of the  
14 study. Firstly, given the cross-sectional nature of the study, reverse causality cannot be ruled out:  
15 subjects suffering from memory impairment could have drunk less water resulting in average lower  
16 levels of PFAA, although this is not a likely explanation given the consistency of the association  
17 across various PFAAs which have substantially different routes of exposure. Secondly, self-reported  
18 is not a very accurate method for ascertaining memory impairment, although errors in classification  
19 are likely to result in non-differential misclassification, biasing the estimate of association towards  
20 the null. Thirdly, the effects of PFAA have been mostly studied in relation to PPAR $\alpha$ <sup>7</sup>, while receptor  
21 mostly implicated in metabolic changes and diabetes and in dementia PPAR $\gamma$ <sup>27</sup>; however, these two  
22 belong to the same receptor family and some degree of cross-activation cannot be excluded, and the  
23 knowledge of their pleiotropic effects is currently advancing<sup>38</sup>. Lastly, the analysis of different anti-  
24 diabetic medications is particularly hampered by the fact that these were self-reported and not  
25 prompted by interviewers. This has likely led to low specificity and thus bias of the association (if  
26 any) towards the null.  
27  
28

29  
30 On the other hand, strengths of this study include the fact that all showed estimates were adjusted  
31 for numerous potential confounders, including age in one-year age bands, making the effect of PFAA  
32 on memory impairment not likely to be confounded by lifestyle characteristics. Furthermore, these  
33 results are based on a very large population representative of the general population in West  
34 Virginia and Ohio<sup>22</sup>, thus estimates are solid. Finally, the 21% prevalence of memory impairment is  
35 compatible and consistent with figures on prevalence of dementia reported for North America (Ferri  
36 et al, 2005).  
37

38  
39 In conclusion, these data show an inverse association between PFOA and PFOS exposure and self-  
40 reported memory-impairment, particularly in non diabetics. This can be potentially explained by  
41 preventive anti-inflammatory effect exerted by a PPAR agonist effect of these perfluoroclorinated  
42 compounds.  
43  
44  
45  
46  
47  
48

**ACKNOWLEDGMENTS**

We are grateful to Dr Marc Weisskopf for his thoughtful comments on the draft of this manuscript, and for constructive idea sharing and discussions on this topic.

**COMPETING INTERESTS:** The authors declare no competing financial interests

**CONTRIBUTORSHIP:** Dr Gallo had full access to all of the data in the study and takes responsibility for the integrity of the data and the accuracy of the data analysis.

Study concept and design: TF BA VG

Analysis and interpretation of data: VG TF BA

Drafting of the manuscript: VG

Data collection: TF

Critical revision of the manuscript for important intellectual content: CB GL

**DATA SHARING:** Extra data is available by emailing Valentina Gallo (v.gallo@qmul.ac.uk)

## References

1. Kato K, Wong LY, Jia LT, Kuklennyk Z, Calafat AM. Trends in Exposure to Polyfluoroalkyl Chemicals in the U.S. Population: 1999-2008 (dagger). *Environ Sci Technol* 2011.
2. Tao L, Kannan K, Kajiwara N, Costa MM, Fillmann G, Takahashi S, et al. Perfluorooctanesulfonate and related fluorochemicals in albatrosses, elephant seals, penguins, and polar skuas from the Southern Ocean. *Environmental science & technology* 2006;40(24):7642-8.
3. Kim SK, Lee KT, Kang CS, Tao L, Kannan K, Kim KR, et al. Distribution of perfluorochemicals between sera and milk from the same mothers and implications for prenatal and postnatal exposures. *Environ Pollut* 2011;159(1):169-74.
4. Lau C, Anitole K, Hodes C, Lai D, Pfahles-Hutchens A, Seed J. Perfluoroalkyl acids: a review of monitoring and toxicological findings. *Toxicological sciences : an official journal of the Society of Toxicology* 2007;99(2):366-94.
5. D'Hollander W, de Voogt P, De Coen W, Bervoets L. Perfluorinated substances in human food and other sources of human exposure. *Reviews of environmental contamination and toxicology* 2010;208:179-215.
6. Goosey E, Harrad S. Perfluoroalkyl compounds in dust from Asian, Australian, European, and North American homes and UK cars, classrooms, and offices. *Environment international* 2011;37(1):86-92.
7. DeWitt JC, Shnyra A, Badr MZ, Loveless SE, Hoban D, Frame SR, et al. Immunotoxicity of perfluorooctanoic acid and perfluorooctane sulfonate and the role of peroxisome proliferator-activated receptor alpha. *Critical reviews in toxicology* 2009;39(1):76-94.
8. Peters JM, Gonzalez FJ. Why toxic equivalency factors are not suitable for perfluoroalkyl chemicals. *Chemical research in toxicology* 2011;24(10):1601-9.
9. Howroyd P, Swanson C, Dunn C, Cattley RC, Corton JC. Decreased longevity and enhancement of age-dependent lesions in mice lacking the nuclear receptor peroxisome proliferator-activated receptor alpha (PPARalpha). *Toxicologic pathology* 2004;32(5):591-9.
10. Capri M, Salvioli S, Sevini F, Valensin S, Celani L, Monti D, et al. The genetics of human longevity. *Annals of the New York Academy of Sciences* 2006;1067:252-63.
11. Paolisso G, Barbieri M, Rizzo MR, Carella C, Rotondi M, Bonafe M, et al. Low insulin resistance and preserved beta-cell function contribute to human longevity but are not associated with TH-INS genes. *Experimental gerontology* 2001;37(1):149-56.
12. Heneka MT, Feinstein DL, Galea E, Gleichmann M, Wullner U, Klockgether T. Peroxisome proliferator-activated receptor gamma agonists protect cerebellar granule cells from cytokine-induced apoptotic cell death by inhibition of inducible nitric oxide synthase. *Journal of neuroimmunology* 1999;100(1-2):156-68.
13. Heneka MT, Klockgether T, Feinstein DL. Peroxisome proliferator-activated receptor-gamma ligands reduce neuronal inducible nitric oxide synthase expression and cell death in vivo. *The Journal of neuroscience : the official journal of the Society for Neuroscience* 2000;20(18):6862-7.
14. Combs CK, Johnson DE, Karlo JC, Cannady SB, Landreth GE. Inflammatory mechanisms in Alzheimer's disease: inhibition of beta-amyloid-stimulated proinflammatory responses and neurotoxicity by PPARgamma agonists. *The Journal of neuroscience : the official journal of the Society for Neuroscience* 2000;20(2):558-67.
15. Kim EJ, Kwon KJ, Park JY, Lee SH, Moon CH, Baik EJ. Effects of peroxisome proliferator-activated receptor agonists on LPS-induced neuronal death in mixed cortical neurons: associated with iNOS and COX-2. *Brain research* 2002;941(1-2):1-10.
16. Luna-Medina R, Cortes-Canteli M, Alonso M, Santos A, Martinez A, Perez-Castillo A. Regulation of inflammatory response in neural cells in vitro by thiazolidinones derivatives through peroxisome proliferator-activated receptor gamma activation. *The Journal of biological chemistry* 2005;280(22):21453-62.



17. Whitehead JP. Diabetes: New conductors for the peroxisome proliferator-activated receptor gamma (PPARgamma) orchestra. *The international journal of biochemistry & cell biology* 2011;43(8):1071-4.
18. Power MC, Webster TF, Baccarelli AA, Weisskopf MG. Cross-Sectional Association between Polyfluoroalkyl Chemicals and Cognitive Limitation in the National Health and Nutrition Examination Survey. *Neuroepidemiology* 2012;40(2):125-32.
19. McCrimmon RJ, Ryan CM, Frier BM. Diabetes and cognitive dysfunction. *Lancet* 2012;379(9833):2291-9.
20. MacNeil J, Steenland NK, Shankar A, Ducatman A. A cross-sectional analysis of type II diabetes in a community with exposure to perfluorooctanoic acid (PFOA). *Environmental research* 2009;109(8):997-1003.
21. Steenland K, Fletcher T, Savitz DA. Epidemiologic evidence on the health effects of perfluorooctanoic acid (PFOA). *Environmental health perspectives* 2010;118(8):1100-8.
22. Frisbee SJ, Brooks AP, Jr., Maher A, Flensburg P, Arnold S, Fletcher T, et al. The C8 health project: design, methods, and participants. *Environmental health perspectives* 2009;117(12):1873-82.
23. Steenland K, Jin C, MacNeil J, Lally C, Ducatman AM, Vieira V, et al. Predictors of PFOA levels in community surrounding a chemical plant. *Environ Health Perspect* 2009;in press.
24. Kuklenyik Z, Reich JA, Tully JS, Needham LL, Calafat AM. Automated solid-phase extraction and measurement of perfluorinated organic acids and amides in human serum and milk. *Environmental science & technology* 2004;38(13):3698-704.
25. Gallo V, Egger M, McCormack V, Farmer PB, Ioannidis JP, Kirsch-Volders M, et al. Strengthening the Reporting of Observational studies in Epidemiology - Molecular Epidemiology (STROBE-ME): An Extension of the STROBE Statement. *PLoS Med* 2011;8(10):e1001117.
26. Gallo V, Leonardi G, Genser B, Lopez-Espinosa MJ, Frisbee SJ, Karlsson L, et al. Serum Perfluorooctanoate (PFOA) and Perfluorooctane Sulfonate (PFOS) Concentrations and Liver Function Biomarkers in a Population with Elevated PFOA Exposure. *Environ Health Perspect* 2012.
27. Lleo A, Galea E, Sastre M. Molecular targets of non-steroidal anti-inflammatory drugs in neurodegenerative diseases. *Cellular and molecular life sciences : CMLS* 2007;64(11):1403-18.
28. Alafuzoff I, Overmyer M, Helisalmi S, Soininen H. Lower Counts of Astroglia and Activated Microglia in Patients with Alzheimer's Disease with Regular Use of Non-Steroidal Anti-Inflammatory Drugs. *Journal of Alzheimer's disease : JAD* 2000;2(1):37-46.
29. Jimenez S, Baglietto-Vargas D, Caballero C, Moreno-Gonzalez I, Torres M, Sanchez-Varo R, et al. Inflammatory response in the hippocampus of PS1M146L/APP751SL mouse model of Alzheimer's disease: age-dependent switch in the microglial phenotype from alternative to classic. *The Journal of neuroscience : the official journal of the Society for Neuroscience* 2008;28(45):11650-61.
30. Revill P, Moral MA, Prous JR. Impaired insulin signaling and the pathogenesis of Alzheimer's disease. *Drugs Today (Barc)* 2006;42(12):785-90.
31. Anbalagan M, Huderson B, Murphy L, Rowan BG. Post-translational modifications of nuclear receptors and human disease. *Nucl Recept Signal* 2012;10:e001.
32. Choi JH, Banks AS, Estall JL, Kajimura S, Bostrom P, Laznik D, et al. Anti-diabetic drugs inhibit obesity-linked phosphorylation of PPARgamma by Cdk5. *Nature* 2010;466(7305):451-6.
33. Hauser S, Adelmant G, Sarraf P, Wright HM, Mueller E, Spiegelman BM. Degradation of the peroxisome proliferator-activated receptor gamma is linked to ligand-dependent activation. *The Journal of biological chemistry* 2000;275(24):18527-33.
34. Wolf CJ, Takacs ML, Schmid JE, Lau C, Abbott BD. Activation of mouse and human peroxisome proliferator-activated receptor alpha by perfluoroalkyl acids of different functional groups and chain lengths. *Toxicological sciences : an official journal of the Society of Toxicology* 2008;106(1):162-71.

- 1  
2  
3 35. Stephan BC, Wells JC, Brayne C, Albanese E, Siervo M. Increased fructose intake as a risk factor  
4 for dementia. *The journals of gerontology. Series A, Biological sciences and medical sciences*  
5 2010;65(8):809-14.  
6  
7 36. Loughridge JL, Barratt J. Does the provision of cooled filtered water in secondary school  
8 cafeterias increase water drinking and decrease the purchase of soft drinks? *Journal of*  
9 *human nutrition and dietetics : the official journal of the British Dietetic Association*  
10 2005;18(4):281-6.  
11 37. Muckelbauer R, Libuda L, Clausen K, Toschke AM, Reinehr T, Kersting M. Promotion and  
12 provision of drinking water in schools for overweight prevention: randomized, controlled  
13 cluster trial. *Pediatrics* 2009;123(4):e661-7.  
14 38. Staels B, Fruchart JC. Therapeutic roles of peroxisome proliferator-activated receptor agonists.  
15 *Diabetes* 2005;54(8):2460-70.  
16  
17  
18  
19  
20  
21  
22  
23  
24  
25  
26  
27  
28  
29  
30  
31  
32  
33  
34  
35  
36  
37  
38  
39  
40  
41  
42  
43  
44  
45  
46  
47  
48  
49  
50  
51  
52  
53  
54  
55  
56  
57  
58  
59  
60



Table 1: Participant Characteristics, Mid-Ohio Valley, 2005-2006 (N=21,024)

|                                     | All<br>N=21,024* | Memory impaired<br>N=4,462^ |
|-------------------------------------|------------------|-----------------------------|
| <b>Males, n (%)</b>                 | 10,353 (49.2)    | 2,040 (19.7)                |
| <b>Females, n (%)</b>               | 10,671 (50.8)    | 2,422 (22.7)                |
| <b>Age, median/mean (SD)</b>        | 60.5/62.3 (9.0)  | 59.9/62.3 (9.4)             |
| <b>Age groups</b>                   |                  |                             |
| 50-54 years                         | 5,381 (25.6)     | 1,185 (22.0)                |
| 55-59 years                         | 4,831 (23.0)     | 1,055 (21.8)                |
| 60-64 years                         | 3,715 (17.7)     | 740 (19.9)                  |
| 65-69 years                         | 2,930 (13.9)     | 535 (18.3)                  |
| 70-74 years                         | 1,979 (9.4)      | 419 (21.2)                  |
| 75-79 years                         | 1,251 (6.0)      | 269 (21.5)                  |
| 80+ years                           | 937 (4.5)        | 259 (27.6)                  |
| <b>Regular exercise, n (%)</b>      | 6,774 (32.2)     | 1,306 (19.3)                |
| <b>BMI, n (%)</b>                   |                  |                             |
| Normal weight                       | 5,100 (24.3)     | 1,051 (20.6)                |
| Overweight                          | 8,194 (39.0)     | 1,612 (19.7)                |
| Obese class I                       | 4,789 (22.8)     | 1,028 (21.5)                |
| Obese class II                      | 1,805 (8.6)      | 457 (25.3)                  |
| Obese class III                     | 1,136 (5.4)      | 314 (27.6)                  |
| <b>Household income, \$/y n (%)</b> |                  |                             |
| ≤10,000                             | 1,486 (7.1)      | 448 (30.2)                  |
| 10,001-20,000                       | 3,059 (14.6)     | 757 (24.8)                  |
| 20,001-30,000                       | 3,281 (15.6)     | 751 (22.9)                  |
| 30,001-40,000                       | 2,936 (14.0)     | 572 (19.5)                  |
| 40,001-50,000                       | 2,135 (10.2)     | 422 (19.8)                  |
| 50,001-60,000                       | 1,815 (8.6)      | 359 (19.8)                  |
| 60,001-70,000                       | 1,367 (6.5)      | 268 (19.6)                  |
| >70,000                             | 2,882 (13.7)     | 480 (16.7)                  |
| Undetermined                        | 2,063 (9.8)      | 405 (19.6)                  |
| <b>Education, n (%)</b>             |                  |                             |
| < 12 years                          | 3,310 (15.7)     | 845 (25.5)                  |
| HS diploma or GED                   | 9,704 (46.2)     | 1,979 (20.4)                |
| Some college                        | 5,612 (26.7)     | 1,204 (21.5)                |
| Bachelor degree or higher           | 2,398 (11.4)     | 434 (18.1)                  |
| <b>Race, n (%)</b>                  |                  |                             |
| White                               | 20,514 (97.6)    | 4,349 (21.2)                |
| Black                               | 213 (1.0)        | 38 (17.8)                   |
| Other                               | 297 (1.4)        | 75 (25.3)                   |
| <b>Alcohol consumption, n (%)</b>   |                  |                             |
| None                                | 13,276 (63.2)    | 2,848 (21.5)                |
| < 1 drink/month                     | 2,589 (12.3)     | 597 (23.1)                  |
| < 1 drink/week                      | 1,530 (7.3)      | 309 (20.2)                  |
| Few drinks/week                     | 2,087 (9.9)      | 397 (19.0)                  |
| 1-3 drinks/day                      | 805 (3.8)        | 142 (17.6)                  |
| >3 drinks/day                       | 310 (1.5)        | 66 (21.3)                   |
| Undetermined                        | 427 (2.0)        | 103 (24.1)                  |
| <b>Smoking status, n (%)</b>        |                  |                             |
| Never smoker                        | 9,804 (46.6)     | 1,906 (19.4)                |
| Former smoker                       | 7,555 (35.8)     | 1,693 (22.5)                |
| Current smoker < 10 cig/day         | 1,212 (5.8)      | 256 (21.1)                  |
| Current smoker 10-19 cig/day        | 1,260 (6.0)      | 310 (24.6)                  |
| Current smoker 20+ cig/day          | 1,213 (5.8)      | 297 (24.5)                  |
| <b>Diabetes, n (%)</b>              |                  |                             |
| Thiazolidinedion use~               | 809 (23.5)       | 202 (25.0)                  |
| Other medications~                  | 1,244 (36.1)     | 321 (25.8)                  |
| No medication~                      | 1,390 (40.4)     | 352 (25.3)                  |

\*percentages refer to the proportion with respect to the entire population; ^percentages reflect the proportion of memory impaired in each category; percentages among diabetics only

Table 2: The association between PFAAs and self-report memory impairment in logistic regression for a doubling PFAA concentration, by quintiles of PFAAs, and in ordinal regression (n=21,024)

|                           | Range<br>(ng/mL) | Adjusted OR and 95% C.I.* |
|---------------------------|------------------|---------------------------|
| <b>PFOS</b>               |                  | 0.93 (0.90-0.96)          |
| 1 <sup>st</sup> quintile  | 0.25-14.4        | Ref.                      |
| 2 <sup>nd</sup> quintile  | 14.5-20.4        | 0.96 (0.87-1.07)          |
| 3 <sup>rd</sup> quintile  | 20.5-27.1        | 0.86 (0.78-0.96)          |
| 4 <sup>th</sup> quintile  | 27.2-37.2        | 0.87 (0.78-0.96)          |
| 5 <sup>th</sup> quintile  | 37.3-759.2       | 0.85 (0.76-0.94)          |
| <b>Trend</b>              |                  | <0.001                    |
| <b>Ordinal regression</b> |                  | 0.95 (0.93-0.98)          |
| <b>PFOA</b>               |                  | 0.96 (0.94-0.98)          |
| 1 <sup>st</sup> quintile  | 0.25-14.0        | Ref.                      |
| 2 <sup>nd</sup> quintile  | 14.1-27.0        | 0.88 (0.79-0.97)          |
| 3 <sup>rd</sup> quintile  | 27.1-53.8        | 0.83 (0.75-0.92)          |
| 4 <sup>th</sup> quintile  | 53.9-118.1       | 0.79 (0.71-0.88)          |
| 5 <sup>th</sup> quintile  | 118.3-22,412     | 0.79 (0.71-0.88)          |
| <b>Trend</b>              |                  | <0.001                    |
| <b>Ordinal regression</b> |                  | 0.97 (0.96-0.98)          |
| <b>PFNA</b>               |                  | 0.96 (0.91-1.00)          |
| 1 <sup>st</sup> quintile  | 0.25-0.90        | Ref.                      |
| 2 <sup>nd</sup> quintile  | 1.0-1.2          | 0.86 (0.78-0.96)          |
| 3 <sup>rd</sup> quintile  | 1.3-1.4          | 0.87 (0.77-0.98)          |
| 4 <sup>th</sup> quintile  | 1.5-1.9          | 0.86 (0.77-0.95)          |
| 5 <sup>th</sup> quintile  | 2.0-28.6         | 0.89 (0.80-0.99)          |
| <b>Trend</b>              |                  | 0.053                     |
| <b>Ordinal regression</b> |                  | 0.97 (0.94-1.01)          |
| <b>PFHxS</b>              |                  | 0.96 (0.93-0.99)          |
| 1 <sup>st</sup> quintile  | 0.25-1.7         | Ref.                      |
| 2 <sup>nd</sup> quintile  | 1.8-2.6          | 1.01 (0.91-1.12)          |
| 3 <sup>rd</sup> quintile  | 2.7-3.6          | 1.02 (0.91-1.13)          |
| 4 <sup>th</sup> quintile  | 3.7-5.6          | 0.93 (0.84-1.04)          |
| 5 <sup>th</sup> quintile  | 5.7-232.6        | 0.89(0.79-0.99)           |
| <b>Trend</b>              |                  | 0.009                     |
| <b>Ordinal regression</b> |                  | 0.97 (0.94-0.99)          |

\*Model adjusted for age (one-year age bands), ethnicity, gender, and school level (categorical), household income (categorical), physical activity, alcohol consumption (categorical, none/<1drink/month, < 1 drink/week, few drinks/week, 1-3 drinks/day, >3 drinks/day, undetermined), and cigarette smoking (categorical, never, former, < 10 cig/day, 12-20 cig/day, 20+ cig/day)

Table 3: The association between PFAAs and self-report memory impairment in logistic regression for a doubling PFAA concentration, by quintiles of distribution, and in ordinal regression by diabetes status (validated by clinical records)

|                                | Range (ng/mL)   | OR (95% CI)*       | p for inter | N               | OR (95% CI)*       | p for inter |
|--------------------------------|-----------------|--------------------|-------------|-----------------|--------------------|-------------|
|                                | <b>PFOS</b>     |                    |             | <b>PFOA</b>     |                    |             |
|                                | <b>N=17,832</b> |                    |             | <b>N=17,832</b> |                    |             |
| <b>Non-diabetics</b>           |                 | 0.93 (0.90-0.96)†  | -           |                 | 0.95 (0.93-0.97) † | -           |
| <b>Ordinal regression</b>      |                 | 0.96 (0.93-0.99)   |             |                 | 0.96 (0.95-0.98)   |             |
| <b>1<sup>st</sup> quintile</b> | 0.25-14.5       | Ref.               |             | 0.25-14.3       | Ref.               |             |
| <b>2<sup>nd</sup> quintile</b> | 14.6-20.5       | 0.96 (0.86-1.08)   |             | 14.4-27.2       | 0.85 (0.76-0.95)   |             |
| <b>3<sup>rd</sup> quintile</b> | 20.6-27.0       | 0.90 (0.80-1.01)   |             | 27.3-54.3       | 0.82 (0.73-0.92)   |             |
| <b>4<sup>th</sup> quintile</b> | 27.1-37.1       | 0.88 (0.78-0.99)   |             | 54.4-119.1      | 0.76 (0.68-0.86)   |             |
| <b>5<sup>th</sup> quintile</b> | 37.2-759.2      | 0.85 (0.76-0.96)   |             | 119.2-8,416     | 0.75 (0.67-0.84)   |             |
| <b>Trend</b>                   |                 | 0.002              |             |                 | <0.001             |             |
|                                | <b>N=3,192</b>  |                    |             | <b>N=3,192</b>  |                    |             |
| <b>Diabetics</b>               |                 | 0.94 (0.88-1.02) † | 0.698       |                 | 1.02 (0.97-1.06) † | 0.014       |
| <b>Ordinal regression</b>      |                 | 0.95 (0.90-1.01)   |             |                 | 1.00 (0.97-1.04)   |             |
| <b>1<sup>st</sup> quintile</b> | 0.25-13.6       | Ref.               |             | 0.25-12.6       | Ref.               |             |
| <b>2<sup>nd</sup> quintile</b> | 13.7-20.0       | 1.06 (0.82-1.36)   |             | 12.7-25.4       | 1.04 (0.80-1.34)   |             |
| <b>3<sup>rd</sup> quintile</b> | 20.1-27.3       | 0.82 (0.63-1.06)   |             | 25.5-48.0       | 0.88 (0.67-1.14)   |             |
| <b>4<sup>th</sup> quintile</b> | 27.4-37.3       | 0.87 (0.67-1.13)   |             | 48.1-102.1      | 1.04 (0.80-1.35)   |             |
| <b>5<sup>th</sup> quintile</b> | 37.4-272.0      | 0.90 (0.69-1.17)   |             | 102.4-22,412    | 1.09 (0.84-1.42)   |             |
| <b>Trend</b>                   |                 | 0.162              |             |                 | 0.543              |             |
|                                | <b>PFNA</b>     |                    |             | <b>PFHxS</b>    |                    |             |
|                                | <b>N=17,832</b> |                    |             | <b>N=17,832</b> |                    |             |
| <b>Non-diabetics</b>           |                 | 0.95 (0.90-0.99) † | -           |                 | 0.96 (0.93-0.99) † | -           |
| <b>Ordinal regression</b>      |                 | 0.97 (0.93-1.01)   |             |                 | 0.97 (0.94-0.99)   |             |
| <b>1<sup>st</sup> quintile</b> | 0.25-0.9        | Ref.               |             | 0.25-1.8        | Ref.               |             |
| <b>2<sup>nd</sup> quintile</b> | 1.0-1.2         | 0.86 (0.77-0.97)   |             | 1.9-2.6         | 0.98 (0.87-1.10)   |             |
| <b>3<sup>rd</sup> quintile</b> | 1.3-1.5         | 0.85 (0.76-0.95)   |             | 2.7-3.7         | 0.99 (0.89-1.11)   |             |
| <b>4<sup>th</sup> quintile</b> | 1.6-1.9         | 0.83 (0.73-0.93)   |             | 3.8-5.7         | 0.93 (0.82-1.05)   |             |
| <b>5<sup>th</sup> quintile</b> | 2.0-28.6        | 0.88 (0.78-0.99)   |             | 5.8-232.6       | 0.88 (0.79-0.99)   |             |
| <b>Trend</b>                   |                 | 0.031              |             |                 | 0.029              |             |
|                                | <b>N=3,192</b>  |                    |             | <b>N=3,192</b>  |                    |             |
| <b>Diabetics</b>               |                 | 1.01 (0.90-1.13) † | 0.259       | 3,192           | 0.99 (0.92-1.06) † | 0.683       |
| <b>Ordinal regression</b>      |                 | 0.99 (0.91-1.09)   |             |                 |                    |             |
| <b>1<sup>st</sup> quintile</b> | 0.25-0.8        | Ref.               |             | 0.25-1.6        | Ref.               |             |
| <b>2<sup>nd</sup> quintile</b> | 0.9-1.1         | 1.06 (0.80-1.40)   |             | 1.7-2.3         | 1.06 (0.81-1.38)   |             |
| <b>3<sup>rd</sup> quintile</b> | 1.2-1.4         | 0.88 (0.66-1.17)   |             | 2.4-3.2         | 1.10 (0.85-1.42)   |             |
| <b>4<sup>th</sup> quintile</b> | 1.5-1.8         | 1.03 (0.77-1.36)   |             | 3.3-5.0         | 1.02 (0.79-1.33)   |             |
| <b>5<sup>th</sup> quintile</b> | 1.9-14.5        | 1.08(0.82-1.43)    |             | 5.1-99.7        | 1.00 (0.77-1.31)   |             |
| <b>Trend</b>                   |                 | 0.620              |             |                 | 0.942              |             |

\*using clinical record validated diagnosis of diabetes and self-reported use of medications, adjusted for age (one-year age bands), ethnicity, gender, school level (categorical), household income (categorical), physical activity, alcohol consumption (categorical, none/<1drink/month, < 1 drink/week, few drinks/week, 1-3 drinks/day, >3 drinks/day, undetermined), and cigarette smoking (categorical, never, former, < 10 cig/day, 12-20 cig/day, 20+ cig/day); † OR for doubling PFAA concentration

Table 4: Sensitivity analysis of the association between PFAAs and self-report memory impairment for a doubling PFAA concentration, by quintiles of PFAAs, and in ordinal regression on subjects aged 65 years and older (n=7,097), and using severe memory impairment as outcome measure (n=21,024).

|                                | Range (ng/mL) | OR (95% C.I.) <sup>b</sup><br>N=7,097<br>Restricted to those<br>aged 65+* | Range (ng/mL) | OR (95% C.I.) <sup>b</sup><br>N=21,024<br>Severely memory<br>impaired <sup>^</sup> |
|--------------------------------|---------------|---------------------------------------------------------------------------|---------------|------------------------------------------------------------------------------------|
| <b>PFOS</b>                    |               | 0.95 (0.90-1.00)                                                          |               | 0.96 (0.90-1.02)                                                                   |
| <b>Ordinal regression</b>      |               | 0.98 (0.94-1.03)                                                          |               |                                                                                    |
| <b>1<sup>st</sup> quintile</b> | 0.25-15.3     | Ref.                                                                      | 0.25-14.4     | Ref.                                                                               |
| <b>2<sup>nd</sup> quintile</b> | 15.4-22.0     | 0.99 (0.83-1.20)                                                          | 14.5-20.4     | 1.13 (0.94-1.35)                                                                   |
| <b>3<sup>rd</sup> quintile</b> | 22.1-28.9     | 0.95 (0.79-1.14)                                                          | 20.5-27.1     | 0.92 (0.76-1.11)                                                                   |
| <b>4<sup>th</sup> quintile</b> | 29.0-4.0      | 0.97 (0.81-1.16)                                                          | 27.2-37.2     | 0.92 (0.75-1.12)                                                                   |
| <b>5<sup>th</sup> quintile</b> | 40.1-759.2    | 0.84 (0.70-1.01)                                                          | 37.3-759.2    | 0.92 (0.75-1.12)                                                                   |
| <b>Trend</b>                   |               | 0.079                                                                     |               | 0.094                                                                              |
| <b>PFOA</b>                    |               | 0.99 (0.97-1.03)                                                          |               | 0.95 (0.92-0.98)                                                                   |
| <b>Ordinal regression</b>      |               | 1.00 (0.97-1.03)                                                          |               |                                                                                    |
| <b>1<sup>st</sup> quintile</b> | 0.25-15.0     | Ref.                                                                      | 0.25-14.0     | Ref.                                                                               |
| <b>2<sup>nd</sup> quintile</b> | 15.1-29.6     | 0.91 (0.75-1.09)                                                          | 14.1-27.0     | 0.84 (0.70-1.01)                                                                   |
| <b>3<sup>rd</sup> quintile</b> | 29.7-56.8     | 0.90 (0.75-1.08)                                                          | 27.1-53.8     | 0.85(0.71-1.02)                                                                    |
| <b>4<sup>th</sup> quintile</b> | 56.9-123.0    | 0.84 (0.70-1.01)                                                          | 53.9-118.1    | 0.79 (0.66-0.96)                                                                   |
| <b>5<sup>th</sup> quintile</b> | 123.1-5,994.8 | 0.99(0.83-1.19)                                                           | 118.3-22,412  | 0.75 (0.61-0.91)                                                                   |
| <b>Tend</b>                    |               | 0.680                                                                     |               | 0.003                                                                              |
| <b>PFNA</b>                    |               | 0.95 (0.87-1.02)                                                          |               | 0.92 (0.85-1.00)                                                                   |
| <b>Ordinal regression</b>      |               | 0.99 (0.93-1.07)                                                          |               |                                                                                    |
| <b>1<sup>st</sup> quintile</b> | 0.25-0.8      | Ref.                                                                      | 0.25-0.90     | Ref.                                                                               |
| <b>2<sup>nd</sup> quintile</b> | 0.9-1.1       | 0.88 (0.73-1.06)                                                          | 1.0-1.2       | 0.89 (0.74-1.07)                                                                   |
| <b>3<sup>rd</sup> quintile</b> | 1.2-1.4       | 0.81 (0.67-0.98)                                                          | 1.3-1.4       | 0.82 (0.66-1.01)                                                                   |
| <b>4<sup>th</sup> quintile</b> | 1.5-1.8       | 0.82 (0.68-0.99)                                                          | 1.5-1.9       | 0.85 (0.71-1.02)                                                                   |
| <b>5<sup>th</sup> quintile</b> | 1.9-11.7      | 0.88 (0.73-1.07)                                                          | 2.0-28.6      | 0.79 (0.65-0.97)                                                                   |
| <b>Trend</b>                   |               | 0.177                                                                     |               | 0.023                                                                              |
| <b>PFHxS</b>                   |               | 0.96 (0.91-1.01)                                                          |               | 0.98 (0.93-1.04)                                                                   |
| <b>Ordinal regression</b>      |               | 0.98 (0.93-1.02)                                                          |               |                                                                                    |
| <b>1<sup>st</sup> quintile</b> | 0.25-1.9      | Ref.                                                                      | 0.25-1.7      | Ref.                                                                               |
| <b>2<sup>nd</sup> quintile</b> | 2.0-2.8       | 0.98 (0.82-1.18)                                                          | 1.8-2.6       | 1.10(0.91-1.33)                                                                    |
| <b>3<sup>rd</sup> quintile</b> | 2.9-3.9       | 0.95 (0.79-1.15)                                                          | 2.7-3.6       | 1.04 (0.86-1.27)                                                                   |
| <b>4<sup>th</sup> quintile</b> | 4.0-6.0       | 0.98 (0.82-1.17)                                                          | 3.7-5.6       | 0.91 (0.75-1.12)                                                                   |
| <b>5<sup>th</sup> quintile</b> | 6.1-232.6     | 0.86 (0.71-1.03)                                                          | 5.7-232.6     | 0.98 (0.80-1.19)                                                                   |
| <b>Trend</b>                   |               | 0.139                                                                     |               | 0.283                                                                              |

<sup>b</sup>Model 2 includes age (one-year age bands), ethnicity, gender, and school level (categorical), household income (categorical), physical activity, alcohol consumption (categorical, none/<1drink/month, < 1 drink/week, few drinks/week, 1-3 drinks/day, >3 drinks/day, undetermined), and cigarette smoking (categorical, never, former, < 10 cig/day, 12-20 cig/day, 20+ cig/day)

\* Sensitivity analysis including subjects aged 65 years or older only (N=7,097)

<sup>^</sup> Sensitivity analysis using a more restrictive definition of memory impairment (those reporting frequent episode of short-term memory loss only, cases = 1,115)

1  
2  
3  
4  
5  
6  
7  
8  
9  
10  
11  
12  
13  
14  
15  
16  
17  
18  
19  
20  
21  
22  
23  
24  
25  
26  
27  
28  
29  
30  
31  
32  
33  
34  
35  
36  
37  
38  
39  
40  
41  
42  
43  
44  
45  
46  
47  
48  
49  
50  
51  
52  
53  
54  
55  
56  
57  
58  
59  
60

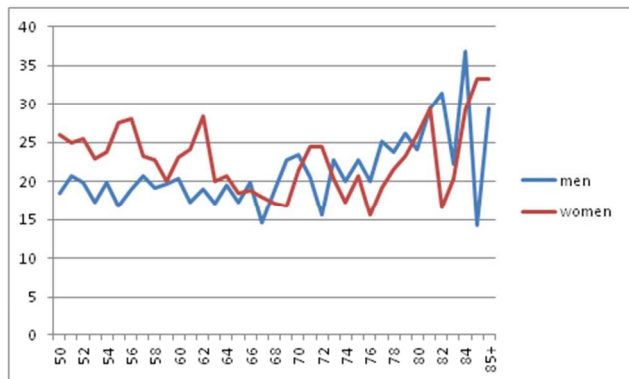

Figure 1: Prevalence of self-reported short-term memory impairment by age and sex in the study population  
203x162mm (96 x 96 DPI)

ew only

Online Table 1: The association between PFAAs and self-reported memory impairment in logistic regression for a doubling PFAA concentration, by quintiles of PFAAs, and in ordinal regression (n=21,024).

|                           | Range<br>(ng/mL) | Model 1 <sup>a</sup> | Model 2 <sup>b</sup> | Model 3 <sup>c</sup> |
|---------------------------|------------------|----------------------|----------------------|----------------------|
| <b>PFOS</b>               |                  | 0.92 (0.89-0.95)     | 0.93 (0.90-0.96)     | 0.93 (0.90-0.96)     |
| <b>Ordinal regression</b> |                  | 0.95 (0.92-0.97)     | 0.95 (0.93-0.98)     | 0.96 (0.93-0.98)     |
| 1 <sup>st</sup> quintile  | 0.25-14.4        | Ref.                 | Ref.                 | Ref.                 |
| 2 <sup>nd</sup> quintile  | 14.5-20.4        | 0.95 (0.85-1.05)     | 0.96 (0.87-1.07)     | 0.97 (0.88-1.08)     |
| 3 <sup>rd</sup> quintile  | 20.5-27.1        | 0.84 (0.76-0.93)     | 0.86 (0.78-0.96)     | 0.87 (0.79-0.97)     |
| 4 <sup>th</sup> quintile  | 27.2-37.2        | 0.83 (0.75-0.93)     | 0.87 (0.78-0.96)     | 0.88 (0.79-0.97)     |
| 5 <sup>th</sup> quintile  | 37.3-759.2       | 0.81 (0.73-0.91)     | 0.85 (0.76-0.94)     | 0.86 (0.77-0.96)     |
| <b>Trend</b>              |                  | <0.001               | <0.001               | 0.001                |
| <b>PFOA</b>               |                  | 0.95 (0.94-0.97)     | 0.96 (0.94-0.98)     | 0.96 (0.94-0.98)     |
| <b>Ordinal regression</b> |                  | 0.97 (0.95-0.98)     | 0.97 (0.96-0.98)     | 0.97 (0.96-0.99)     |
| 1 <sup>st</sup> quintile  | 0.25-14.0        | Ref.                 | Ref.                 | Ref.                 |
| 2 <sup>nd</sup> quintile  | 14.1-27.0        | 0.86 (0.78-0.96)     | 0.88 (0.79-0.97)     | 0.88 (0.80-0.98)     |
| 3 <sup>rd</sup> quintile  | 27.1-53.8        | 0.82 (0.74-0.91)     | 0.83 (0.75-0.92)     | 0.84 (0.76-0.93)     |
| 4 <sup>th</sup> quintile  | 53.9-118.1       | 0.77 (0.70-0.86)     | 0.79 (0.71-0.88)     | 0.81 (0.73-0.90)     |
| 5 <sup>th</sup> quintile  | 118.3-22,412     | 0.76 (0.69-0.85)     | 0.79 (0.71-0.88)     | 0.80 (0.72-0.90)     |
| <b>Trend</b>              |                  | <0.001               | <0.001               | <0.001               |
| <b>PFNA</b>               |                  | 0.94 (0.90-0.98)     | 0.96 (0.91-1.00)     | 0.96 (0.92-1.01)     |
| <b>Ordinal regression</b> |                  | 0.96 (0.93-0.99)     | 0.97 (0.94-1.01)     | 0.98 (0.94-1.01)     |
| 1 <sup>st</sup> quintile  | 0.25-0.90        | Ref.                 | Ref.                 | Ref.                 |
| 2 <sup>nd</sup> quintile  | 1.0-1.2          | 0.85 (0.77-0.94)     | 0.86 (0.78-0.96)     | 0.87 (0.78-0.96)     |
| 3 <sup>rd</sup> quintile  | 1.3-1.4          | 0.85 (0.76-0.95)     | 0.87 (0.77-0.98)     | 0.88 (0.78-0.98)     |
| 4 <sup>th</sup> quintile  | 1.5-1.9          | 0.83 (0.75-0.92)     | 0.86 (0.77-0.95)     | 0.86 (0.78-0.95)     |
| 5 <sup>th</sup> quintile  | 2.0-28.6         | 0.85 (0.76-0.94)     | 0.89 (0.80-0.99)     | 0.90 (0.81-1.01)     |
| <b>Trend</b>              |                  | 0.004                | 0.053                | 0.079                |
| <b>PFHxS</b>              |                  | 0.95 (0.92-0.98)     | 0.96 (0.93-0.99)     | 0.97 (0.94-1.00)     |
| <b>Ordinal regression</b> |                  | 0.96 (0.94-0.99)     | 0.97 (0.94-0.99)     | 0.97 (0.95-0.99)     |
| 1 <sup>st</sup> quintile  | 0.25-1.7         | Ref.                 | Ref.                 | Ref.                 |
| 2 <sup>nd</sup> quintile  | 1.8-2.6          | 1.00 (0.90-1.11)     | 1.01 (0.91-1.12)     | 1.02 (0.91-1.13)     |
| 3 <sup>rd</sup> quintile  | 2.7-3.6          | 1.00 (0.90-1.11)     | 1.02 (0.91-1.13)     | 1.03 (0.93-1.15)     |
| 4 <sup>th</sup> quintile  | 3.7-5.6          | 0.91 (0.82-1.02)     | 0.93 (0.84-1.04)     | 0.96 (0.86-1.06)     |
| 5 <sup>th</sup> quintile  | 5.7-232.6        | 0.86 (0.77-0.96)     | 0.89(0.79-0.99)      | 0.92 (0.82-1.02)     |
| <b>Trend</b>              |                  | 0.001                | 0.009                | 0.053                |

Online Table 2: The association between PFAAs and self-report memory impairment for a doubling PFAA concentration and by tertiles of distribution by self-reported anti-diabetic treatment

|                               | Range (ng/ML) | N     | PFOS<br>OR (95% CI)* | Range (ng/ML) | PFOA<br>OR (95% CI)* | Range (ng/ML) | PFNA<br>OR (95% CI)* | Range (ng/ML) | PFHxS<br>OR (95% CI)* |
|-------------------------------|---------------|-------|----------------------|---------------|----------------------|---------------|----------------------|---------------|-----------------------|
| <b>Thiazolidinedione use</b>  |               | 809   | 1.00 (0.86-1.16)     |               | 0.97 (0.88-1.07)     |               | 0.94 (0.74-1.19)     |               | 1.02 (0.87-1.20)      |
| <b>Ordinal regression</b>     |               |       | 1.06 (0.93-1.20)     |               | 1.03 (0.95-1.11)     |               | 1.02 (0.84-1.25)     |               | 1.05 (0.92-1.20)      |
| <b>1<sup>st</sup> tertile</b> | 0.25-17.9     |       | Ref.                 | 1.1-17.5      | Ref.                 | 0.25-1.0      | Ref.                 | 0.25-1.9      | Ref.                  |
| <b>2<sup>nd</sup> tertile</b> | 18.0-29.9     |       | 0.76 (0.50-1.16)     | 17.6-49.7     | 0.72 (0.47-1.10)     | 1.1-1.5       | 0.83 (0.54-1.26)     | 2.0-3.5       | 1.56 (1.02-2.38)      |
| <b>3<sup>rd</sup> tertile</b> | 30.1-104.9    |       | 0.93 (0.61-1.42)     | 19.9-8,068    | 0.81 (0.53-1.24)     | 1.6-14.7      | 0.79 (0.51-1.23)     | 3.6-84.0      | 1.13 (0.72-1.77)      |
| <b>p-value for trend</b>      |               |       | 0.737                |               | 0.333                |               | 0.309                |               | 0.628                 |
| <b>Other medications</b>      |               | 1,244 | 0.90 (0.80-1.01)     |               | 1.00 (0.93-1.07)     |               | 0.95 (0.79-1.15)     |               | 0.91 (0.81-1.03)      |
| <b>Ordinal regression</b>     |               |       | 0.92 (0.83-1.01)     |               | 1.00 (0.93-1.07)     |               | 0.94 (0.81-1.10)     |               | 0.94 (0.86-1.04)      |
| <b>1<sup>st</sup> tertile</b> | 0.25-17.9     |       | Ref.                 | 0.25-20.5     | Ref.                 | 0.25-1.1      | Ref.                 | 0.25-2.1      | Ref.                  |
| <b>2<sup>nd</sup> tertile</b> | 18.0-29.8     |       | 0.75 (0.54-1.04)     | 20.6-63.2     | 0.99 (0.71-1.39)     | 1.2-1.6       | 0.72 (0.52-1.01)     | 2.2-3.6       | 0.99 (0.71-1.38)      |
| <b>3<sup>rd</sup> tertile</b> | 29.9-218.0    |       | 0.68 (0.48-0.95)     | 63.4-2,316.2  | 0.92 (0.66-1.29)     | 1.7-6.0       | 0.85 (0.61-1.20)     | 3.7-99.7      | 0.82 (0.58-1.16)      |
| <b>p-value for trend</b>      |               |       | 0.023                |               | 0.644                |               | 0.341                |               | 0.259                 |
| <b>No medication</b>          |               | 1,390 | 0.95 (0.85-1.07)     |               | 1.00 (0.94-1.08)     |               | 1.03 (0.87-1.23)     |               | 1.01 (0.90-1.13)      |
| <b>Ordinal regression</b>     |               |       | 0.94 (0.86-1.03)     |               | 1.00 (0.95-1.06)     |               | 0.98 (0.85-1.13)     |               | 0.99 (0.90-1.08)      |
| <b>1<sup>st</sup> tertile</b> | 0.25-18.3     |       | Ref.                 | 0.7-20.2      | Ref.                 | 0.25-1.0      | Ref.                 | 0.25-2.1      | Ref.                  |
| <b>2<sup>nd</sup> tertile</b> | 18.4-29.3     |       | 1.11 (0.81-1.52)     | 20.3-63.4     | 1.05 (0.77-1.44)     | 1.1-1.5       | 1.01 (0.72-1.40)     | 2.2-3.7       | 0.93 (0.68-1.28)      |
| <b>3<sup>rd</sup> tertile</b> | 29.4-272.0    |       | 1.02 (0.74-1.40)     | 63.5-22,412   | 0.99 (0.72-1.37)     | 1.6-14.5      | 1.12 (0.81-1.54)     | 3.8-43.3      | 0.99 (0.72-1.37)      |
| <b>p-value for trend</b>      |               |       | 0.897                |               | 0.984                |               | 0.473                |               | 0.957                 |

\*using clinical record validated diagnosis of diabetes and self-reported use of medications, adjusted for age (one-year age bands), ethnicity, gender, school level (categorical), household income (categorical), physical activity, alcohol consumption (categorical, none/<1drink/month, < 1 drink/week, few drinks/week, 1-3 drinks/day, >3 drinks/day, undetermined), and cigarette smoking (categorical, never, former, < 10 cig/day, 12-20 cig/day, 20+ cig/day); † OR for doubling PFAA concentration

Table S1

(Gallo et al. [2011] PLoS Med; doi:10.1371/journal.pmed.1001117)

| The Strengthening the Reporting Observational studies in Epidemiology – Molecular Epidemiology (STROBE-ME) Reporting Recommendations: Extended from STROBE statement |             |                                                                                                                                                                                                                                                                                                                                                                                                                                                                                                                                                                                                                                                          |                                                                                                                                                                                                                               |
|----------------------------------------------------------------------------------------------------------------------------------------------------------------------|-------------|----------------------------------------------------------------------------------------------------------------------------------------------------------------------------------------------------------------------------------------------------------------------------------------------------------------------------------------------------------------------------------------------------------------------------------------------------------------------------------------------------------------------------------------------------------------------------------------------------------------------------------------------------------|-------------------------------------------------------------------------------------------------------------------------------------------------------------------------------------------------------------------------------|
| Item                                                                                                                                                                 | Item number | STROBE Guidelines                                                                                                                                                                                                                                                                                                                                                                                                                                                                                                                                                                                                                                        | Extension for Molecular Epidemiology Studies (STROBE-ME)                                                                                                                                                                      |
| Title and abstract                                                                                                                                                   | 1           | (a) Indicate the study's design with a commonly used term in the title or the abstract<br><br>(b) Provide in the abstract an informative and balanced summary of what was done and what was found                                                                                                                                                                                                                                                                                                                                                                                                                                                        | ME-1 State the use of specific biomarker(s) in the title and/or in the abstract if they contribute substantially to the findings                                                                                              |
| <b>Introduction</b>                                                                                                                                                  |             |                                                                                                                                                                                                                                                                                                                                                                                                                                                                                                                                                                                                                                                          |                                                                                                                                                                                                                               |
| Background rationale                                                                                                                                                 | 2           | Explain the scientific background and rationale for the investigation being reported                                                                                                                                                                                                                                                                                                                                                                                                                                                                                                                                                                     | ME-2 Explain in the scientific background of the study how/why the specific biomarker(s) have been chosen, potentially among many others (e.g., others are studied but reported elsewhere, or not studied at all)             |
| Objectives                                                                                                                                                           | 3           | State specific objectives, including any pre-specified hypotheses                                                                                                                                                                                                                                                                                                                                                                                                                                                                                                                                                                                        | ME-3 <i>A priori</i> hypothesis: if one or more biomarkers are used as proxy measures, state the <i>a priori</i> hypothesis on the expected values of the biomarker(s)                                                        |
| <b>Methods</b>                                                                                                                                                       |             |                                                                                                                                                                                                                                                                                                                                                                                                                                                                                                                                                                                                                                                          |                                                                                                                                                                                                                               |
| Study design                                                                                                                                                         | 4           | Present key elements of study design early in the paper                                                                                                                                                                                                                                                                                                                                                                                                                                                                                                                                                                                                  | ME-4 Describe the special study designs for molecular epidemiology (in particular nested case/control and case/cohort) and how they were implemented                                                                          |
| <i>Biological sample collection</i>                                                                                                                                  |             |                                                                                                                                                                                                                                                                                                                                                                                                                                                                                                                                                                                                                                                          | ME-4.1 Report on the setting of the biological sample collection; amount of sample; nature of collecting procedures; participant conditions; time between sample collection and relevant clinical or physiological endpoints. |
| <i>Biological sample storage</i>                                                                                                                                     |             |                                                                                                                                                                                                                                                                                                                                                                                                                                                                                                                                                                                                                                                          | ME-4.2 Describe sample processing (centrifugation, timing, additives, etc).                                                                                                                                                   |
| <i>Biological sample processing</i>                                                                                                                                  |             |                                                                                                                                                                                                                                                                                                                                                                                                                                                                                                                                                                                                                                                          | ME-4.3 Describe sample storage until biomarker analysis (storage, thawing, manipulation, etc).                                                                                                                                |
| <i>Biomarker biochemical characteristics</i>                                                                                                                         |             |                                                                                                                                                                                                                                                                                                                                                                                                                                                                                                                                                                                                                                                          | ME-4.4 Report the half-life of the biomarker, and chemical and physical characteristics (e.g., solubility).                                                                                                                   |
| Setting                                                                                                                                                              | 5           | Describe the setting, locations, and relevant dates, including periods of recruitment, exposure, follow-up, and data collection                                                                                                                                                                                                                                                                                                                                                                                                                                                                                                                          |                                                                                                                                                                                                                               |
| Participants                                                                                                                                                         | 6           | (a) Cohort study—Give the eligibility criteria, and the sources and methods of selection of participants. Describe methods of follow-up<br>Case-control study—Give the eligibility criteria, and the sources and methods of case ascertainment and control selection. Give the rationale for the choice of cases and controls<br>Cross-sectional study—Give the eligibility criteria, and the sources and methods of selection of participants<br>(b) Cohort study—For matched studies, give matching criteria and number of exposed and unexposed<br>Case-control study—For matched studies, give matching criteria and the number of controls per case | ME-6 Report any habit, clinical conditions, physiological factor, or working or living condition that might affect the characteristics or concentrations of the biomarker                                                     |
| Variables                                                                                                                                                            | 7           | Clearly define all outcomes, exposures, predictors, potential confounders, and effect modifiers. Give diagnostic criteria, if applicable                                                                                                                                                                                                                                                                                                                                                                                                                                                                                                                 |                                                                                                                                                                                                                               |
| Data source/measurement                                                                                                                                              | 8           | For each variable of interest, give sources of data and details of methods of assessment (measurement). Describe comparability of assessment methods if there is more than one group                                                                                                                                                                                                                                                                                                                                                                                                                                                                     | ME-8 Laboratory methods: report type of assay used, detection limit, quantity of biological sample used, outliers, timing in the assay procedures (when applicable) and calibration procedures or any standard used           |
| Bias                                                                                                                                                                 | 9           | Describe any efforts to address potential sources of bias                                                                                                                                                                                                                                                                                                                                                                                                                                                                                                                                                                                                |                                                                                                                                                                                                                               |
| Study size                                                                                                                                                           | 10          | Explain how the study size was arrived at                                                                                                                                                                                                                                                                                                                                                                                                                                                                                                                                                                                                                |                                                                                                                                                                                                                               |
| Quantitative variables                                                                                                                                               | 11          | Explain how quantitative variables were handled in the analyses. If applicable, describe which groupings were chosen, and why                                                                                                                                                                                                                                                                                                                                                                                                                                                                                                                            |                                                                                                                                                                                                                               |
| Statistical methods                                                                                                                                                  | 12          | (a) Describe all statistical methods, including those used to control for confounding<br>(b) Describe any methods used to examine subgroups and interactions<br>(c) Explain how missing data were addressed<br>(d) Cohort study—If applicable, explain how loss to follow-up was addressed<br>Case-control study—If applicable, explain how matching of cases and controls was addressed<br>Cross-sectional study—If applicable, describe analytical methods taking account of sampling strategy<br>(e) Describe any sensitivity analyses                                                                                                                | ME-12 Describe how biomarkers were introduced into statistical models                                                                                                                                                         |



|                                                                      |           |                                                                                                                                                                                                                                                                                                                                                                                                                 |                                                                                                                                                                                |
|----------------------------------------------------------------------|-----------|-----------------------------------------------------------------------------------------------------------------------------------------------------------------------------------------------------------------------------------------------------------------------------------------------------------------------------------------------------------------------------------------------------------------|--------------------------------------------------------------------------------------------------------------------------------------------------------------------------------|
| Validity/reliability of measurement and internal/external validation |           |                                                                                                                                                                                                                                                                                                                                                                                                                 | <b>ME-12.1</b> Report on the validity and reliability of measurement of the biomarker(s) coming from the literature and any internal or external validation used in the study. |
| <b>Results</b>                                                       |           |                                                                                                                                                                                                                                                                                                                                                                                                                 |                                                                                                                                                                                |
| Participants                                                         | <b>13</b> | (a) Report the numbers of individuals at each stage of the study—e.g., numbers potentially eligible, examined for eligibility, confirmed eligible, included in the study, completing follow-up, and analysed<br>(b) Give reasons for non-participation at each stage<br>(c) Consider use of a flow diagram                                                                                                      | <b>ME-13</b> Give reason for loss of biological samples at each stage                                                                                                          |
| Descriptive data                                                     | <b>14</b> | (a) Give characteristics of study participants (e.g., demographic, clinical, social) and information on exposures and potential confounders<br>(b) Indicate the number of participants with missing data for each variable of interest<br>(c) Cohort study—Summarise follow-up time (e.g., average and total amount)                                                                                            |                                                                                                                                                                                |
| Distribution of biomarker measurement                                |           |                                                                                                                                                                                                                                                                                                                                                                                                                 | <b>ME-14.1</b> Give the distribution of the biomarker measurement (including mean, median, range, and variance)                                                                |
| Outcome data                                                         | <b>15</b> | Cohort study—Report numbers of outcome events or summary measures over time<br>Case-control study—Report numbers in each exposure category, or summary measures of exposure<br>Cross-sectional study—Report numbers of outcome events or summary measures                                                                                                                                                       |                                                                                                                                                                                |
| Main results                                                         | <b>16</b> | (a) Give unadjusted estimates and, if applicable, confounder-adjusted estimates and their precision (e.g., 95% confidence interval). Make clear which confounders were adjusted for and why they were included<br>(b) Report category boundaries when continuous variables were categorized<br>(c) If relevant, consider translating estimates of relative risk into absolute risk for a meaningful time period |                                                                                                                                                                                |
| Other analyses                                                       | <b>17</b> | Report other analyses done—e.g., analyses of subgroups and interactions, and sensitivity analyses                                                                                                                                                                                                                                                                                                               |                                                                                                                                                                                |
| <b>Discussion</b>                                                    |           |                                                                                                                                                                                                                                                                                                                                                                                                                 |                                                                                                                                                                                |
| Key results                                                          | <b>18</b> | Summarise key results with reference to study objectives                                                                                                                                                                                                                                                                                                                                                        |                                                                                                                                                                                |
| Limitations                                                          | <b>19</b> | Discuss limitations of the study, taking into account sources of potential bias or imprecision. Discuss both direction and magnitude of any potential bias                                                                                                                                                                                                                                                      | <b>ME-19</b> Describe main limitations in laboratory procedures                                                                                                                |
| Interpretation                                                       | <b>20</b> | Give a cautious overall interpretation of results considering objectives, limitations, multiplicity of analyses, results from similar studies, and other relevant evidence                                                                                                                                                                                                                                      | <b>ME-20</b> Give an interpretation of results in terms of <i>a-priori</i> biological plausibility                                                                             |
| Generalisability                                                     | <b>21</b> | Discuss the generalisability (external validity) of the study results                                                                                                                                                                                                                                                                                                                                           |                                                                                                                                                                                |
| <b>Other information</b>                                             |           |                                                                                                                                                                                                                                                                                                                                                                                                                 |                                                                                                                                                                                |
| Funding                                                              | <b>22</b> | Give the source of funding and the role of the funders for the present study and, if applicable, for the original study on which the present article is based                                                                                                                                                                                                                                                   |                                                                                                                                                                                |
| Ethics                                                               |           |                                                                                                                                                                                                                                                                                                                                                                                                                 | <b>ME-22.1</b> Describe informed consent and approval from ethical committee(s). Specify whether samples were anonymous, anonymised or identifiable                            |



**Serum perfluoroalkyl acids concentrations and memory impairment in a large cross-sectional study**

|                                 |                                                                                                                                                                                                                                                                                                                                                                                                                                                                                  |
|---------------------------------|----------------------------------------------------------------------------------------------------------------------------------------------------------------------------------------------------------------------------------------------------------------------------------------------------------------------------------------------------------------------------------------------------------------------------------------------------------------------------------|
| Journal:                        | <i>BMJ Open</i>                                                                                                                                                                                                                                                                                                                                                                                                                                                                  |
| Manuscript ID:                  | bmjopen-2012-002414.R1                                                                                                                                                                                                                                                                                                                                                                                                                                                           |
| Article Type:                   | Research                                                                                                                                                                                                                                                                                                                                                                                                                                                                         |
| Date Submitted by the Author:   | 19-Mar-2013                                                                                                                                                                                                                                                                                                                                                                                                                                                                      |
| Complete List of Authors:       | Gallo, Valentina; Queen Mary, University of London, Centre for Primary Care and Public Health<br>Leonardi, Giovanni; London School of Hygiene and Tropical Medicine, Social and Environmental Health Research<br>Brayne, Carol; University of Cambridge,<br>Armstrong, Ben; London School of Hygiene and Tropical Medicine, Social and Environmental Health Research<br>Fletcher, Tony; London School of Hygiene and Tropical Medicine, Social and Environmental Health Research |
| <b>Primary Subject Heading</b>: | Epidemiology                                                                                                                                                                                                                                                                                                                                                                                                                                                                     |
| Secondary Subject Heading:      | Neurology                                                                                                                                                                                                                                                                                                                                                                                                                                                                        |
| Keywords:                       | Toxicology < PATHOLOGY, Epidemiology < TROPICAL MEDICINE, Dementia < NEUROLOGY                                                                                                                                                                                                                                                                                                                                                                                                   |
|                                 |                                                                                                                                                                                                                                                                                                                                                                                                                                                                                  |

SCHOLARONE™  
Manuscripts

Only

1  
2  
3 **Serum perfluoroalkyl acids concentrations and memory impairment in a large cross-sectional**  
4 **study**  
5

6 Valentina Gallo<sup>1,2</sup>, Giovanni Leonardi<sup>1</sup>, Carol Brayne<sup>3</sup>, Ben Armstrong<sup>1</sup>, Tony Fletcher<sup>1</sup>  
7  
8  
9

- 10  
11  
12  
13 1. Social and Environmental Health Research, London School of Hygiene and Tropical Medicine, London  
14 (UK)  
15 2. Centre for Primary Care and Public Health, Blizard Institute, Queen Mary, University of London,  
16 London (UK)  
17 3. University of Cambridge, Cambridge (UK)  
18  
19  
20  
21  
22

23 **Please send the correspondence to:**  
24

25 Dr Valentina Gallo, MD, MSc, PhD  
26 London School of Hygiene and Tropical Medicine  
27 Faculty of Public Health and Policy  
28 15-17 Tavistock place  
29 WC1H 9SH London  
30 Tel +44/(0)20/7927 2779  
31 Email: valentina.gallo@lshtm.ac.uk  
32  
33  
34  
35  
36  
37  
38  
39  
40

41 **Key words:** memory disorders [MeSH], prefluoroalkyl acids, perfluorooctanoic acid [MeSH], C8  
42 Health Panel Study  
43

44 **Running title:** perfluoroalkyl acids and memory impairment  
45

46 **Word count:** 3,251  
47  
48  
49  
50  
51  
52  
53  
54  
55  
56  
57  
58  
59  
60

## Summary

### Article focus

- Cross-sectional association between serum level of Perfluorooctanate (PFOA), perfluorooctane sulfonate (PFOS), perfluorononanoic acid (PFNA) and perfluorohexane sulfonate (PFHxS) and self-reported memory impairment in a population exposed to high levels of PFOA
- Potential interaction between the association of perfluoroalkyl acids (PFAAs) with memory impairment by diabetes status

### Key Message

- Inverse associations between PFOS and PFOA and memory impairment were statistically significant perhaps due to a potential anti-inflammatory effect exerted through PPAR agonism. Comparable inverse associations with PFNA and PFHxS were of borderline statistical significance
- Inverse associations of PFAAs with memory impairment were weaker or non-existent in diabetics than overall in non-diabetics. Analysis further stratified by specific diabetes medication use showed no variation in odds ratios more than explicable by chance given the number of tests made.

### Strengths and limitations

- Very large sample size including 21,024 adults with measured serum level of Perfluoroalkyl acids (PFAAs) with a given geographical distribution allowing some multilevel modelling
- The cross-sectional nature of the design does not allow any causal inference and makes results particularly prone to reverse causality
- Self-reported is not an optimal method for estimating the degree of memory impairment in a population

**ABSTRACT**

**Objectives** – To examine the cross-sectional association between serum PFOA, PFOS, PFNA, and PFHxS concentrations with self-reported memory impairment in adults and the interaction of these associations with diabetes status

**Design** - Cross-sectional study

**Setting** – Population-based in Mid-Ohio Valley, West Virginia following contamination by a chemical plant

**Participants** - The C8 Health Project collected data and measured serum level of PFAAs of 21,024 adults aged 50+ years

**Primary outcome measure** – Self-reported memory impairment as defined by the question “have experienced short term memory loss?”

**Results** - A total of 4,057 subjects self-reported short-term memory impairment. Inverse associations between PFOS and PFOA and memory impairment were highly statistically significant with fully adjusted OR=0.93 (95% C.I. 0.90-0.96) for doubling PFOS and OR=0.96 (95% C.I. 0.94-0.98) for doubling PFOA concentrations. Comparable inverse associations with PFNA and PFHxS were of borderline statistical significance. Inverse associations of PFAAs with memory impairment were weaker or non-existent in diabetics than overall in non-diabetics.

**Conclusion** - An inverse association between PFAA serum levels and self-reported memory impairment has been observed in this large population-based, cross-sectional study stronger and more statistically significant for PFOA and PFOS. The associations can be potentially explained by preventive anti-inflammatory effect exerted by a PPAR agonist effect of these PFAAs, but confounding or even reverse causation cannot be excluded as an alternative explanation.

## INTRODUCTION

Perfluoroalkyl acids (PFAAs) are man-made compounds used during the manufacture of fluoropolymers including non-stick cookware and breathable, yet waterproof, fabrics. They can also result from the metabolism of fluorinated telomers, compounds used for food package coatings, carpet treatments, and stain-resistant fabric treatment. Perfluorooctanate (PFOA), perfluorooctane sulfonate (PFOS), perfluorononanoic acid (PFNA) and perfluorohexane sulfonate (PFHxS) persist in the environment and are found in the blood of humans and many animal species throughout the world<sup>1,2</sup>. Potential sources of exposure to PFAAs in humans include drinking water, dust, breast milk, fish and other foods, food packaging, ambient air, and occupational exposure<sup>3-6</sup>.

In animal models, perfluoroalkyl chemicals can activate peroxisome proliferator-activated receptor alpha (PPAR $\alpha$ ), a ligand-activated transcription factor that regulates gene expression, lipid modulation, glucose homeostasis, cell proliferation and inflammation<sup>7,8</sup>. The PPAR receptor has been involved in the ageing process: PPAR $\alpha$  null mice showed a decreased longevity compared with the wild-type due to non-neoplastic spontaneous ageing lesions which occurred with a higher incidence and a short latency in the PPAR $\alpha$  null mice<sup>9</sup>. Also PPAR $\gamma$  variants were reported to be associated with longevity in humans with low insulin resistance<sup>10,11</sup>. Activation of the PPAR $\gamma$  receptor *in vitro* and *in vivo* also prevents the expression of inflammatory cytokines and other inflammatory mediators in brains of Alzheimer disease animal models<sup>12,13</sup>. In addition, PPAR $\gamma$  agonists have been demonstrated to suppress the A $\beta$ -mediated activation of microglia *in vitro* and prevent cortical or hippocampal neuronal cell death<sup>14-16</sup>. PPAR $\gamma$  is also deeply involved in diabetes, given its ability to orchestrate the expression of genes involved in lipid metabolism, adipogenesis, and inflammation. It is activated by endogenous ligands (such as fatty acids and prostaglandins) or drugs such as thiazolidinedione. It is most highly expressed in adipocytes where it acts as the master regulator of adipogenesis via induction of adipogenic genes<sup>17</sup>. However, a study *in vitro* showed that PFOA and PFOS activate differentially PPAR $\alpha$  and PPAR $\gamma$  receptors, but it is not possible to directly extrapolate these results to toxicity studies *in vivo*<sup>18</sup>. Therefore, in line with what was recently observed by Power et al<sup>19</sup>, we hypothesised that increased exposure to PFAA could be associated with a better cognitive function.

The positive association between diabetes and cognitive impairment is well established<sup>20</sup>; some studies investigating the association between PFOA exposure and diabetes suggested the presence of an inverse association: a negative trend in diabetes occurrence by increasing serum PFOA deciles

1  
2  
3 was found in a case-control study nested in a previous study based on the population investigated  
4 here <sup>21 22</sup>; but not in others <sup>23 24</sup>.

5  
6  
7 From 1950-2005, a chemical plant in the Mid-Ohio Valley, West Virginia was responsible for emitting  
8 PFOA into the surrounding environment. In 2001, a group of residents from the nearby West Virginia  
9 and Ohio communities filed a class action lawsuit alleging health damage from drinking water  
10 supplies drawing on PFOA-contaminated groundwater <sup>25</sup>. Part of the pre-trial settlement of the class  
11 action lawsuit included a baseline survey, the C8 Health Project, conducted in 2005-2006, that  
12 gathered data from over 69,000 people from six contaminated water districts surrounding the plant  
13 <sup>25</sup>. In this population, PFOA concentrations ranged from US background levels to very high; overall  
14 PFOA levels are much higher in this population (geometric mean 42.6.0 ng/mL, 95% C.I. 41.8-43.3)  
15 than in the corresponding US population surveys (NHANES in same year mean 3.95 ng/mL, 95% C.I.  
16 3.65-4.27) <sup>1 25</sup>. The mean PFOS (geometric mean 22.4, 95% C.I. 22.2-22.6), PFNA (1.37, 95% C.I. 1.36-  
17 1.38), and PFHxS (3.18, 95% C.I. 3.15-3.22) closely resembled values from a nationally representative  
18 US sample form a similar time frame (mean PFOS 20.7, 95% C.I. 19.2-22.3; mean PFNA 0.97, 95% C.I.  
19 0.82-1.14; and PFHxS 1.93, 95% C.I. 1.73-2.16) <sup>1</sup>.

20  
21  
22 The present study uses these data to examine the cross-sectional association between serum PFOA,  
23 PFOS, PFNA, and PFHxS concentrations with self-reported memory impairment in adults, and its  
24 potential interaction with diabetes status.  
25  
26  
27  
28  
29  
30  
31  
32  
33  
34  
35  
36  
37  
38  
39  
40

## 41 **METHODS**

### 42 **The Study population**

43  
44 This study is one of the C8 Science Panel Studies and uses information from questionnaires and  
45 blood tests collected in the C8 Health Project, supplemented by further information on classification  
46 by water district developed in a companion C8 Science Panel Study.  
47  
48  
49  
50

51  
52 The C8 Health Project enrolled eligible subjects between August 2005 and August 2006. Individuals  
53 were eligible to participate in the C8 Health Project if they had consumed water for at least one year  
54 between 1950 and December 3, 2004 while living, working, or going to school in one of the following  
55 six water districts: Little Hocking Water Association of Ohio; City of Belpre, Ohio; Tupper Plains-  
56  
57  
58  
59  
60

1  
2  
3 Chester District of Ohio; Village of Pomeroy, Ohio; Lubeck Public Service District of West Virginia;  
4 Mason County Public Service District of West Virginia; or private water sources within  
5  
6 aforementioned districts and areas of documented PFOA contamination. Details of the study  
7  
8 enrolment process, including consenting procedures, have been described elsewhere<sup>25</sup>.  
9

10  
11 The C8 Health Project collected data on 69,030 people. The participation rate for the C8 Health  
12  
13 Project based on US census counts of residents in the affected water districts during Project  
14  
15 enrolment, have been estimated at around 80%<sup>25</sup>. In this population, the strongest predictor of  
16  
17 PFOA serum concentration was residence in one of the contaminated water districts<sup>26</sup>; serum levels  
18  
19 of other PFAAs do not show such geographic variation. Of the population, 21,724 older adults (aged  
20  
21 ≥50 years) were considered for this analysis, and a total of 21,024 (96.8%) were included in the final  
22  
23 analysis after exclusion of subjects with missing data on ethnicity, education level, socio-economic  
24  
25 status, cigarette smoking, or BMI measurements.  
26

### 27 **Memory impairment definition**

28 During the survey (2005-2006), all participants were asked if they “had experienced short term  
29  
30 memory loss”, the possible answers being “frequently”, “sometimes”, “rarely”, and “never”. The  
31  
32 principle analyses assessed memory impairment defined as reporting short-term memory loss  
33  
34 frequently or sometimes, compared to rarely and never. Memory impairment ever was also  
35  
36 considered, defined as reporting any memory loss and compared to the never category.  
37

### 38 **Laboratory analysis**

39 Blood samples were obtained and processed at individual data collection sites. Samples were drawn  
40  
41 into four tubes per participant, with a maximum 35 mL. Tubes were spun, aliquoted, and  
42  
43 refrigerated until shipping. Samples were shipped on dry ice daily from each data collection site to  
44  
45 the laboratory daily<sup>25</sup>. Participants were not asked to fast before blood sample withdrawal, but  
46  
47 fasting status was recorded.

48 Laboratory analysis of PFAAs used an automated solid-phase extraction combined with reverse-  
49  
50 phase high-performance liquid chromatography<sup>27</sup>. Analyses were conducted by the Exygen Research  
51  
52 Inc., State College, PA, USA; an intra-laboratory quality assurance program was carried out by  
53  
54 analysis of duplicate samples at AXYS Analytical Service Ltd., Sidney, BC, Canada<sup>25</sup>. The intra-  
55  
56 laboratory coefficient of variation for all PFAAs measurements was 0.1; the inter-laboratory  
57  
58 comparison coefficient of variation was 0.2 for PFOA and PFNA, 0.1 for PFOS, and not applicable for  
59  
60 PFHxA as all in the second lab measurement values were below level of detection<sup>25</sup>. The detection



1  
2  
3 limit for all PFAAS was 0.5 ng/mL and observations below this limit were assigned a value of 0.25  
4 ng/mL ( $n=16$ ,  $n=101$ ,  $n=532$ , and  $n=387$  for PFOA, PFOS, PFNA, and PFHxS, respectively, for this study  
5 population). All PFAAs concentration distributions were skewed to the right. Methods and results  
6 are reported according to STROBE-ME recommendations<sup>28</sup>.  
7  
8  
9

### 10 11 **Statistical analysis**

12 Associations between exposure (serum concentration of PFOA, PFOS, PFNA, and PFHxS) and memory  
13 impairment were studied using logistic regression. Minimally adjusted models included age, in one  
14 year age-band, race (white, black, and others), gender, and educational level (high school diploma or  
15 general educational development (GED), some college, bachelor degree or higher) (Model 1).  
16 Further adjusted models additionally included average household income ( $\leq \$10,000$ ,  $\$10,001-$   
17  $20,000$ ,  $\$20,001-30,000$ ,  $\$30,001-40,000$ ,  $\$40,001-50,000$ ,  $\$50,001-60,000$ ,  $\$60,001-70,000$ ,  
18  $> \$70,000$ ), physical activity, alcohol consumption (none,  $<1$  drink/month,  $<1$  drink/week, few  
19 drinks/week,  $>1$  drink/day) and cigarette smoking (never smoker, former smoker, current smoker  
20  $<10$  cigarettes/day, current smoker 10-19 cigarettes/day, current smoker  $\geq 20$  cigarettes/day) (Model  
21 2). Fully adjusted models included also body mass index (BMI) (underweight/normal weight;  
22 overweight; and obese class I, II, and III), and diabetes (Model 3). PFAA concentrations were log-  
23 transformed to reduce skewness. For each model the association between PFAAs and self-reported  
24 memory impairment was calculated for a doubling in PFAA concentration in a model with PFAA  
25 entered as continuous covariate, for quintile groups of the PFAA distribution, and by ordinal  
26 regression analysis with the outcome variable comprising the four original levels of self-reported  
27 frequency of episodes of memory loss, again in relation to a doubling of PFAAs. To explore possible  
28 differential effect of PFAA in sub-groups, analyses were further stratified by diabetes status and,  
29 among diabetics, by type of medications.  
30  
31  
32  
33  
34  
35  
36  
37  
38  
39  
40  
41  
42

43 The following four sensitivity analyses were carried out: firstly one analysis restricting the sample to  
44 7,097 subjects aged 65 years and older. Secondly, an analysis conducted on the entire sample, but  
45 using as outcome definition those reporting any memory loss (frequently, sometimes, and rarely).  
46 Our final sensitivity analysis utilises the geographical clustering of PFOA exposure by water districts  
47 which allowed use to decompose the overall estimate of association of PFOA with memory  
48 impairment into within and between water district components, by including as explanatory  
49 variables both water district mean logged PFOA serum concentration and the deviations of  
50 individual's values from their district mean<sup>29</sup>. These two associations are subject to different  
51 potential biases, so help interpretation.  
52  
53  
54  
55  
56  
57  
58  
59  
60

### Role of funding

Funding for this work, the “C8 Science Panel Community Study at London School of Hygiene and Tropical Medicine - LSHTM”, comes from the C8 Class Action Settlement Agreement (Circuit Court of Wood County, WV, USA) between DuPont and plaintiffs, which resulted from releases of PFOA (or C8) into drinking water. It is one of the C8 Science Panel Studies undertaken by the Court-approved C8 Science Panel established under the same Settlement Agreement. The task of the C8 Science Panel, of which Tony Fletcher is a member, is to undertake research in the Mid-Ohio Valley, and subsequently evaluate the results along with other available information to determine if there are any probable links between PFOA and disease. Funds were administered by the Garden City Group (Melville, NY) that reports to the Court. The authors of this manuscript declare that their ability to design, conduct, interpret, or publish research was unimpeded by and fully independent of the court and/or settling parties. In addition, they declare no competing financial interests. The LSHTM Ethics Committee approved this study.

### RESULTS

A total of 4,462 subjects (21.2% of the entire population of 21,024 individuals aged 50 years or older) self-reported short-term memory impairment (**Error! Reference source not found.**): episodes of short-term memory loss were reported frequently by 1,115 subjects (5.3%); sometimes by 3,347 (15.9%); rarely by 4,283 (20.4%) and never by 12,279 (58.4%). Many personal characteristics were associated individually with memory loss, including higher age, lower socio-economic status, smoking, and diagnosis of diabetes (Table 1), though to what extent these reflected independent risk factors was not investigated.

Results from the logistic regression of association between PFAAs and memory impairment are shown in Table 2. Results for minimally, further and fully adjusted models were similar, so we show only further adjusted results in this table, but results for all models are in the on-line Table 1. Inverse associations between PFOS and PFOA and memory impairment were highly statistically significant with adjusted OR=0.93 (0.90-0.96) for PFOS and OR=0.96 (0.94-0.98) for PFOA for doubling PFAA concentrations. Inverse associations of similar magnitude with PFNA and PFHxS but of borderline statistical significance were found: OR=0.96 (0.92-1.02) for PFNA and OR=0.97 (0.94-1.00) for PFHxS. The analysis by PFAA quintile groups shows similar patterns.

1  
2  
3 Inverse associations of PFAAs with memory impairment were weaker or non-existent in diabetics  
4 than for non-diabetics (Table 3), though odds ratios were imprecise, and the difference by diabetes  
5 status was only significant for PFOA (p-value for interaction = 0.014). Analysis further stratified by  
6 specific diabetes medication use showed no variation in odds ratios more than explicable by chance  
7 given the number of tests made (on-line Table 2).  
8  
9

10  
11 In the sensitivity analysis on subjects older than 65 years, the substantial reduction of the sample  
12 size resulted in loss of precision in odds ratios. However, the points estimates of associations with  
13 memory impairment were of comparable magnitude for all PFAAs except PFOA for which the  
14 association with memory impairment was close to null (OR= 0.99 (0.97-1.03)) (Table 4).  
15  
16

17  
18 The analysis carried out on the entire sample, comparing those with any memory impairment  
19 against those with no memory problems shows slightly weaker associations for each PFAAs but  
20 precision was reduced (Table 4). Analyses using ordinal regression in place of binary logistic  
21 regression yielded similar results to the logistic regressions (Table 2, Table 3, and Table 4).  
22  
23

24  
25 The analysis separating the PFOA-memory impairment association into within and between water  
26 district components found that within water districts there was an inverse association between  
27 PFOA and memory impairment, as in the overall association (OR 0.94, 95%CI 0.91-0.98, scale and  
28 adjustments as before). However there was no association between geometric mean concentration  
29 by and memory impairment (OR 1.00, 95%CI 0.97-1.03, per doubling in geometric mean PFOA by  
30 district).  
31  
32

33  
34 Extra data is available upon request by emailing Tony Fletcher (tony.fletcher@lshtm.ac.uk).  
35  
36  
37  
38  
39  
40  
41  
42  
43

## 44 DISCUSSION

45  
46 An inverse association between PFAAs serum levels (including PFOS, PFOA, PNA, and PFHxS) and  
47 self-reported memory impairment has been observed in this large population-based, cross-sectional  
48 study. This association is more clearly monotonic with increasing exposure, and more statistically  
49 significant for PFOA and PFOS. However, the consistent decrement for all PFAAs suggests a common  
50 mechanism.  
51  
52

53  
54 It is plausible that PFAAs could have an effect on cognitive function via PPAR agonism. Although it is  
55 not clear to what extent PFAAs act differentially on PPAR receptors  $\alpha$  and  $\gamma$ <sup>18</sup>, it could be speculated  
56  
57  
58  
59  
60

1  
2  
3 that this association might be mediated by the activation of the PPAR receptor by PFAAs. Activation  
4 of the PPAR $\gamma$  receptors has been shown to decrease the secretion of proinflammatory cytokines and  
5 possibly increase phagocytosis of A $\beta$  inclusions, probably through activation of microglia<sup>30</sup>. However  
6 there was suggestion that this effect of suppression of the activation of microglia was age-  
7 dependent or disease stage-dependent being not significant in patients with advanced Alzheimer's  
8 disease (AD)<sup>31 32</sup>. PPAR agonist drugs, such as non-steroidal anti-inflammatory drugs (NSAID) and  
9 some anti-diabetics (i.e. thiazolidinedione or pioglitazone) have been proposed as preventive drugs  
10 for neurodegenerative conditions, including Alzheimer's dementia<sup>30 33</sup>.

11  
12  
13  
14  
15  
16  
17 In a previous published study an inverse association between PFAAs and memory impairment was  
18 observed specifically among non-medicated diabetics<sup>19</sup>. In the present study, this pattern was not  
19 replicated, with the inverse association between PFAAs and cognitive impairment being more  
20 evident in those without diabetes; among diabetics, the association was not present, irrespective of  
21 treatment status. This finding could be explained by the fact that in diabetics PPAR receptors are  
22 more phosphorylated with a consequent reduced transcriptional activity<sup>34 35</sup>, and the balance  
23 between PPAR $\gamma$  expression and activity levels is altered<sup>34 36</sup>. It is therefore possible – based on the  
24 present data – that the PPAR-agonist effect of PFAAs is different in subjects with and without PPAR-  
25 mediated metabolic changes such as diabetes. Also, it has been reported that PFAAs have a PPAR  
26 agonist effect, more prominently PPAR- $\alpha$ <sup>37</sup>; animal models suggest that PFOA has a stronger  
27 agonistic effect than PFOS<sup>37</sup>. Our findings of an inverse association between PFAA and memory  
28 impairment among non-diabetics, would therefore be compatible with a possible anti-inflammatory  
29 role exerted by PFAA on early symptoms of cognitive impairment.

30  
31  
32  
33  
34  
35  
36  
37  
38  
39  
40  
41  
42  
43  
44  
45  
46  
47  
48  
49  
50  
51  
52  
53  
54  
55  
56  
57  
58  
59  
60  
There is some evidence of detrimental effects of PFAAs in neurodevelopment of mice affecting the  
cholinergic system and cognitive function<sup>38-40</sup>, thus timing of exposure may also be relevant in order  
for the PFAAs to exert this hypothesised anti-dementing role. However, these findings should be  
interpreted cautiously given the limitations of the study. Firstly, given the cross-sectional nature of  
the study, reverse causality must be considered: subjects suffering from memory impairment could  
have consumed less of these compounds via water and food sources, though this is not a likely  
explanation given the consistency of the association across various PFAAs which have substantially  
different routes of exposure. Host characteristics such as genotype could be correlated with both  
some mechanism predisposing these symptoms and variation in PFAA excretion rates, thus leading  
to a confounded association with serum levels. Further, self-report is not a very accurate method for  
ascertaining memory impairment, although errors in classification would be expected to be non-  
differential misclassification, biasing the estimate of association towards the null. The effects of

1  
2  
3 PFAA have been mostly studied in relation to PPAR $\alpha$ <sup>7</sup>, while the receptor mostly implicated in  
4 metabolic changes and diabetes and in dementia PPAR $\gamma$ <sup>30</sup>; however, these two belong to the same  
5 receptor family and some degree of cross-activation cannot be excluded, and the knowledge of their  
6 pleiotropic effects is currently advancing<sup>41</sup>. Lastly, the classification into different anti-diabetic  
7 medications is uncertain as these were self-reported and not prompted by interviewers. However,  
8 we consider it very unlikely that any misreporting would be confounded with serum PFAAs. This  
9 would tend to low specificity and thus bias of the association (if any) towards the null.  
10

11  
12  
13  
14  
15 On the other hand, strengths of this study include the fact that all showed estimates were adjusted  
16 for numerous potential confounders, including age in one-year age bands, making the effect of PFAA  
17 on memory impairment not likely to be confounded by lifestyle characteristics. Furthermore, these  
18 results are based on a very large population representative of the general population in West  
19 Virginia and Ohio<sup>25</sup>, thus estimates are solid; and the 21% prevalence of memory impairment is  
20 compatible and consistent with figures on prevalence of dementia reported for North America (Ferri  
21 et al, 2005).  
22  
23  
24  
25  
26

27 Individual serum levels reflect the contributions of both intake and retention/excretion rates. While  
28 we have no direct data on either of these components, the large differences in drinking water  
29 contamination and associated average population serum levels for PFOA in the 6 water districts,  
30 allow an estimate of the effect of exposure. That the association with PFOA was entirely within  
31 water districts, and not present at all between water districts despite large differences in (geometric)  
32 mean PFOA between districts (range 15.7 – 405.1) is suggestive of a bias operating at one or both of  
33 these levels. The between district estimate is not vulnerable to reverse causation or confounding at  
34 individual level, though some ecological confounding may operate if it happens to correlate with  
35 exposure level. Conversely the within district estimate but not between district estimate could  
36 reflect such individual confounding if present. Thus either the association documented at individual  
37 level could be confounded (e.g. by a common genetic variant related to both dementia risk and  
38 some excretion pathways); or that the association at the district level is biased towards the null (e.g.  
39 by confounding by socio-economic status). This sensitivity analysis cannot prove the presence of  
40 confounding at either level, but if the association had been consistent at both individual and district  
41 level that would have been more convincing of the association being due to PFAAs.  
42  
43  
44  
45  
46  
47  
48  
49  
50  
51

52 The size of the associations observed has both strong and weak aspects. The strong statistical  
53 significance suggests chance is an unlikely explanation. However, the odds ratios are only modestly  
54 different from one, 0.75 at the most extreme, so that biases are a more plausible explanation than  
55 they would be with more extreme ratios. In conclusion, these data show an inverse association  
56  
57  
58  
59  
60

1  
2  
3 between PFOA and PFOS exposure and self-reported memory-impairment, particularly in non  
4 diabetics. This can be potentially explained by preventive anti-inflammatory effect exerted by a  
5 PPAR agonist effect of these PFAAs, but confounding or even reverse causation cannot be excluded  
6 as an alternative explanation.  
7  
8  
9

#### 10 11 12 **ACKNOWLEDGMENTS**

13  
14 We are grateful to Dr Marc Weisskopf for his thoughtful comments on the draft of this manuscript,  
15 and for constructive idea sharing and discussions on this topic.  
16  
17  
18  
19

20  
21 **COMPETING INTERESTS:** The authors declare no competing financial interests  
22  
23  
24  
25  
26  
27  
28  
29  
30  
31  
32  
33  
34  
35  
36  
37  
38  
39  
40  
41  
42  
43  
44  
45  
46  
47  
48  
49  
50  
51  
52  
53  
54  
55  
56  
57  
58  
59  
60

## References

1. Kato K, Wong LY, Jia LT, Kuklennyk Z, Calafat AM. Trends in Exposure to Polyfluoroalkyl Chemicals in the U.S. Population: 1999-2008 (dagger). *Environ Sci Technol* 2011.
2. Tao L, Kannan K, Kajiwara N, Costa MM, Fillmann G, Takahashi S, et al. Perfluorooctanesulfonate and related fluorochemicals in albatrosses, elephant seals, penguins, and polar skuas from the Southern Ocean. *Environmental science & technology* 2006;40(24):7642-8.
3. Kim SK, Lee KT, Kang CS, Tao L, Kannan K, Kim KR, et al. Distribution of perfluorochemicals between sera and milk from the same mothers and implications for prenatal and postnatal exposures. *Environ Pollut* 2011;159(1):169-74.
4. Lau C, Anitole K, Hodes C, Lai D, Pfahles-Hutchens A, Seed J. Perfluoroalkyl acids: a review of monitoring and toxicological findings. *Toxicological sciences : an official journal of the Society of Toxicology* 2007;99(2):366-94.
5. D'Hollander W, de Voogt P, De Coen W, Bervoets L. Perfluorinated substances in human food and other sources of human exposure. *Reviews of environmental contamination and toxicology* 2010;208:179-215.
6. Goosey E, Harrad S. Perfluoroalkyl compounds in dust from Asian, Australian, European, and North American homes and UK cars, classrooms, and offices. *Environment international* 2011;37(1):86-92.
7. DeWitt JC, Shnyra A, Badr MZ, Loveless SE, Hoban D, Frame SR, et al. Immunotoxicity of perfluorooctanoic acid and perfluorooctane sulfonate and the role of peroxisome proliferator-activated receptor alpha. *Critical reviews in toxicology* 2009;39(1):76-94.
8. Peters JM, Gonzalez FJ. Why toxic equivalency factors are not suitable for perfluoroalkyl chemicals. *Chemical research in toxicology* 2011;24(10):1601-9.
9. Howroyd P, Swanson C, Dunn C, Cattley RC, Corton JC. Decreased longevity and enhancement of age-dependent lesions in mice lacking the nuclear receptor peroxisome proliferator-activated receptor alpha (PPARalpha). *Toxicologic pathology* 2004;32(5):591-9.
10. Capri M, Salvioli S, Sevini F, Valensin S, Celani L, Monti D, et al. The genetics of human longevity. *Annals of the New York Academy of Sciences* 2006;1067:252-63.
11. Paolisso G, Barbieri M, Rizzo MR, Carella C, Rotondi M, Bonafe M, et al. Low insulin resistance and preserved beta-cell function contribute to human longevity but are not associated with TH-INS genes. *Experimental gerontology* 2001;37(1):149-56.
12. Heneka MT, Feinstein DL, Galea E, Gleichmann M, Wullner U, Klockgether T. Peroxisome proliferator-activated receptor gamma agonists protect cerebellar granule cells from cytokine-induced apoptotic cell death by inhibition of inducible nitric oxide synthase. *Journal of neuroimmunology* 1999;100(1-2):156-68.
13. Heneka MT, Klockgether T, Feinstein DL. Peroxisome proliferator-activated receptor-gamma ligands reduce neuronal inducible nitric oxide synthase expression and cell death in vivo. *The Journal of neuroscience : the official journal of the Society for Neuroscience* 2000;20(18):6862-7.
14. Combs CK, Johnson DE, Karlo JC, Cannady SB, Landreth GE. Inflammatory mechanisms in Alzheimer's disease: inhibition of beta-amyloid-stimulated proinflammatory responses and neurotoxicity by PPARgamma agonists. *The Journal of neuroscience : the official journal of the Society for Neuroscience* 2000;20(2):558-67.
15. Kim EJ, Kwon KJ, Park JY, Lee SH, Moon CH, Baik EJ. Effects of peroxisome proliferator-activated receptor agonists on LPS-induced neuronal death in mixed cortical neurons: associated with iNOS and COX-2. *Brain research* 2002;941(1-2):1-10.
16. Luna-Medina R, Cortes-Canteli M, Alonso M, Santos A, Martinez A, Perez-Castillo A. Regulation of inflammatory response in neural cells in vitro by thiazolidinones derivatives through peroxisome proliferator-activated receptor gamma activation. *The Journal of biological chemistry* 2005;280(22):21453-62.



17. Whitehead JP. Diabetes: New conductors for the peroxisome proliferator-activated receptor gamma (PPARgamma) orchestra. *The international journal of biochemistry & cell biology* 2011;43(8):1071-4.
18. Takacs ML, Abbott BD. Activation of mouse and human peroxisome proliferator-activated receptors (alpha, beta/delta, gamma) by perfluorooctanoic acid and perfluorooctane sulfonate. *Toxicological sciences : an official journal of the Society of Toxicology* 2007;95(1):108-17.
19. Power MC, Webster TF, Baccarelli AA, Weisskopf MG. Cross-Sectional Association between Polyfluoroalkyl Chemicals and Cognitive Limitation in the National Health and Nutrition Examination Survey. *Neuroepidemiology* 2012;40(2):125-32.
20. McCrimmon RJ, Ryan CM, Frier BM. Diabetes and cognitive dysfunction. *Lancet* 2012;379(9833):2291-9.
21. MacNeil J, Steenland NK, Shankar A, Ducatman A. A cross-sectional analysis of type II diabetes in a community with exposure to perfluorooctanoic acid (PFOA). *Environmental research* 2009;109(8):997-1003.
22. Steenland K, Fletcher T, Savitz DA. Epidemiologic evidence on the health effects of perfluorooctanoic acid (PFOA). *Environmental health perspectives* 2010;118(8):1100-8.
23. Lin CY, Chen PC, Lin YC, Lin LY. Association among serum perfluoroalkyl chemicals, glucose homeostasis, and metabolic syndrome in adolescents and adults. *Diabetes care* 2009;32(4):702-7.
24. Lundin JI, Alexander BH, Olsen GW, Church TR. Ammonium perfluorooctanoate production and occupational mortality. *Epidemiology* 2009;20(6):921-8.
25. Frisbee SJ, Brooks AP, Jr., Maher A, Flensburg P, Arnold S, Fletcher T, et al. The C8 health project: design, methods, and participants. *Environmental health perspectives* 2009;117(12):1873-82.
26. Steenland K, Jin C, MacNeil J, Lally C, Ducatman AM, Vieira V, et al. Predictors of PFOA levels in community surrounding a chemical plant. *Environ Health Perspect* 2009;in press.
27. Kuklenyik Z, Reich JA, Tully JS, Needham LL, Calafat AM. Automated solid-phase extraction and measurement of perfluorinated organic acids and amides in human serum and milk. *Environmental science & technology* 2004;38(13):3698-704.
28. Gallo V, Egger M, McCormack V, Farmer PB, Ioannidis JP, Kirsch-Volders M, et al. Strengthening the Reporting of Observational studies in Epidemiology - Molecular Epidemiology (STROBE-ME): An Extension of the STROBE Statement. *PLoS Med* 2011;8(10):e1001117.
29. Gallo V, Leonardi G, Genser B, Lopez-Espinosa MJ, Frisbee SJ, Karlsson L, et al. Serum Perfluorooctanoate (PFOA) and Perfluorooctane Sulfonate (PFOS) Concentrations and Liver Function Biomarkers in a Population with Elevated PFOA Exposure. *Environ Health Perspect* 2012.
30. Lleo A, Galea E, Sastre M. Molecular targets of non-steroidal anti-inflammatory drugs in neurodegenerative diseases. *Cellular and molecular life sciences : CMLS* 2007;64(11):1403-18.
31. Alafuzoff I, Overmyer M, Helisalmi S, Soininen H. Lower Counts of Astroglia and Activated Microglia in Patients with Alzheimer's Disease with Regular Use of Non-Steroidal Anti-Inflammatory Drugs. *Journal of Alzheimer's disease : JAD* 2000;2(1):37-46.
32. Jimenez S, Baglietto-Vargas D, Caballero C, Moreno-Gonzalez I, Torres M, Sanchez-Varo R, et al. Inflammatory response in the hippocampus of PS1M146L/APP751SL mouse model of Alzheimer's disease: age-dependent switch in the microglial phenotype from alternative to classic. *The Journal of neuroscience : the official journal of the Society for Neuroscience* 2008;28(45):11650-61.
33. Revill P, Moral MA, Prous JR. Impaired insulin signaling and the pathogenesis of Alzheimer's disease. *Drugs Today (Barc)* 2006;42(12):785-90.
34. Anbalagan M, Huderson B, Murphy L, Rowan BG. Post-translational modifications of nuclear receptors and human disease. *Nucl Recept Signal* 2012;10:e001.



- 1  
2  
3 35. Choi JH, Banks AS, Estall JL, Kajimura S, Bostrom P, Laznik D, et al. Anti-diabetic drugs inhibit  
4 obesity-linked phosphorylation of PPARgamma by Cdk5. *Nature* 2010;466(7305):451-6.  
5 36. Hauser S, Adelmant G, Sarraf P, Wright HM, Mueller E, Spiegelman BM. Degradation of the  
6 peroxisome proliferator-activated receptor gamma is linked to ligand-dependent activation.  
7 *The Journal of biological chemistry* 2000;275(24):18527-33.  
8 37. Wolf CJ, Takacs ML, Schmid JE, Lau C, Abbott BD. Activation of mouse and human peroxisome  
9 proliferator-activated receptor alpha by perfluoroalkyl acids of different functional groups  
10 and chain lengths. *Toxicological sciences : an official journal of the Society of Toxicology*  
11 2008;106(1):162-71.  
12 38. Johansson N, Eriksson P, Viberg H. Neonatal exposure to PFOS and PFOA in mice results in  
13 changes in proteins which are important for neuronal growth and synaptogenesis in the  
14 developing brain. *Toxicological sciences : an official journal of the Society of Toxicology*  
15 2009;108(2):412-8.  
16 39. Johansson N, Fredriksson A, Eriksson P. Neonatal exposure to perfluorooctane sulfonate (PFOS)  
17 and perfluorooctanoic acid (PFOA) causes neurobehavioural defects in adult mice.  
18 *Neurotoxicology* 2008;29(1):160-9.  
19 40. Viberg H, Lee I, Eriksson P. Adult dose-dependent behavioral and cognitive disturbances after a  
20 single neonatal PFHxS dose. *Toxicology* 2013;304:185-91.  
21 41. Staels B, Fruchart JC. Therapeutic roles of peroxisome proliferator-activated receptor agonists.  
22 *Diabetes* 2005;54(8):2460-70.  
23  
24  
25  
26  
27  
28  
29  
30  
31  
32  
33  
34  
35  
36  
37  
38  
39  
40  
41  
42  
43  
44  
45  
46  
47  
48  
49  
50  
51  
52  
53  
54  
55  
56  
57  
58  
59  
60

Table 1: Participant Characteristics, Mid-Ohio Valley, 2005-2006 (N=21,024)

|                                     | All<br>N=21,024* | Memory impaired<br>N=4,462^ |
|-------------------------------------|------------------|-----------------------------|
| Males, n (%)                        | 10,353 (49.2)    | 2,040 (19.7)                |
| Females, n (%)                      | 10,671 (50.8)    | 2,422 (22.7)                |
| Age, median/mean (SD)               | 60.5/62.3 (9.0)  | 59.9/62.3 (9.4)             |
| <b>Age groups</b>                   |                  |                             |
| 50-54 years                         | 5,381 (25.6)     | 1,185 (22.0)                |
| 55-59 years                         | 4,831 (23.0)     | 1,055 (21.8)                |
| 60-64 years                         | 3,715 (17.7)     | 740 (19.9)                  |
| 65-69 years                         | 2,930 (13.9)     | 535 (18.3)                  |
| 70-74 years                         | 1,979 (9.4)      | 419 (21.2)                  |
| 75-79 years                         | 1,251 (6.0)      | 269 (21.5)                  |
| 80+ years                           | 937 (4.5)        | 259 (27.6)                  |
| Regular exercise, n (%)             | 6,774 (32.2)     | 1,306 (19.3)                |
| <b>BMI, n (%)</b>                   |                  |                             |
| Normal weight                       | 5,100 (24.3)     | 1,051 (20.6)                |
| Overweight                          | 8,194 (39.0)     | 1,612 (19.7)                |
| Obese class I                       | 4,789 (22.8)     | 1,028 (21.5)                |
| Obese class II                      | 1,805 (8.6)      | 457 (25.3)                  |
| Obese class III                     | 1,136 (5.4)      | 314 (27.6)                  |
| <b>Household income, \$/y n (%)</b> |                  |                             |
| ≤10,000                             | 1,486 (7.1)      | 448 (30.2)                  |
| 10,001-20,000                       | 3,059 (14.6)     | 757 (24.8)                  |
| 20,001-30,000                       | 3,281 (15.6)     | 751 (22.9)                  |
| 30,001-40,000                       | 2,936 (14.0)     | 572 (19.5)                  |
| 40,001-50,000                       | 2,135 (10.2)     | 422 (19.8)                  |
| 50,001-60,000                       | 1,815 (8.6)      | 359 (19.8)                  |
| 60,001-70,000                       | 1,367 (6.5)      | 268 (19.6)                  |
| >70,000                             | 2,882 (13.7)     | 480 (16.7)                  |
| Undetermined                        | 2,063 (9.8)      | 405 (19.6)                  |
| <b>Education, n (%)</b>             |                  |                             |
| < 12 years                          | 3,310 (15.7)     | 845 (25.5)                  |
| HS diploma or GED                   | 9,704 (46.2)     | 1,979 (20.4)                |
| Some college                        | 5,612 (26.7)     | 1,204 (21.5)                |
| Bachelor degree or higher           | 2,398 (11.4)     | 434 (18.1)                  |
| <b>Race, n (%)</b>                  |                  |                             |
| White                               | 20,514 (97.6)    | 4,349 (21.2)                |
| Black                               | 213 (1.0)        | 38 (17.8)                   |
| Other                               | 297 (1.4)        | 75 (25.3)                   |
| <b>Alcohol consumption, n (%)</b>   |                  |                             |
| None                                | 13,276 (63.2)    | 2,848 (21.5)                |
| < 1 drink/month                     | 2,589 (12.3)     | 597 (23.1)                  |
| < 1 drink/week                      | 1,530 (7.3)      | 309 (20.2)                  |
| Few drinks/week                     | 2,087 (9.9)      | 397 (19.0)                  |
| 1-3 drinks/day                      | 805 (3.8)        | 142 (17.6)                  |
| >3 drinks/day                       | 310 (1.5)        | 66 (21.3)                   |
| Undetermined                        | 427 (2.0)        | 103 (24.1)                  |
| <b>Smoking status, n (%)</b>        |                  |                             |
| Never smoker                        | 9,804 (46.6)     | 1,906 (19.4)                |
| Former smoker                       | 7,555 (35.8)     | 1,693 (22.5)                |
| Current smoker < 10 cig/day         | 1,212 (5.8)      | 256 (21.1)                  |
| Current smoker 10-19 cig/day        | 1,260 (6.0)      | 310 (24.6)                  |
| Current smoker 20+ cig/day          | 1,213 (5.8)      | 297 (24.5)                  |
| <b>Diabetes, n (%)</b>              |                  |                             |
| Thiazolidinedion use~               | 809 (23.5)       | 202 (25.0)                  |
| Other medications~                  | 1,244 (36.1)     | 321 (25.8)                  |
| No medication~                      | 1,390 (40.4)     | 352 (25.3)                  |

\*percentages refer to the proportion with respect to the entire population; ^percentages reflect the proportion of memory impaired in each category; percentages among diabetics only

Table 2: The association between PFAAs and self-report memory impairment in logistic regression for a doubling PFAA concentration, by quintiles of PFAAs, and in ordinal regression (n=21,024)

|                           | Range<br>(ng/mL) | Adjusted OR and 95% C.I.* |
|---------------------------|------------------|---------------------------|
| <b>PFOS</b>               |                  | 0.93 (0.90-0.96)          |
| 1 <sup>st</sup> quintile  | 0.25-14.4        | Ref.                      |
| 2 <sup>nd</sup> quintile  | 14.5-20.4        | 0.96 (0.87-1.07)          |
| 3 <sup>rd</sup> quintile  | 20.5-27.1        | 0.86 (0.78-0.96)          |
| 4 <sup>th</sup> quintile  | 27.2-37.2        | 0.87 (0.78-0.96)          |
| 5 <sup>th</sup> quintile  | 37.3-759.2       | 0.85 (0.76-0.94)          |
| <b>Trend</b>              |                  | <0.001                    |
| <b>Ordinal regression</b> |                  | 0.95 (0.93-0.98)          |
| <b>PFOA</b>               |                  | 0.96 (0.94-0.98)          |
| 1 <sup>st</sup> quintile  | 0.25-14.0        | Ref.                      |
| 2 <sup>nd</sup> quintile  | 14.1-27.0        | 0.88 (0.79-0.97)          |
| 3 <sup>rd</sup> quintile  | 27.1-53.8        | 0.83 (0.75-0.92)          |
| 4 <sup>th</sup> quintile  | 53.9-118.1       | 0.79 (0.71-0.88)          |
| 5 <sup>th</sup> quintile  | 118.3-22,412     | 0.79 (0.71-0.88)          |
| <b>Trend</b>              |                  | <0.001                    |
| <b>Ordinal regression</b> |                  | 0.97 (0.96-0.98)          |
| <b>PFNA</b>               |                  | 0.96 (0.91-1.00)          |
| 1 <sup>st</sup> quintile  | 0.25-0.90        | Ref.                      |
| 2 <sup>nd</sup> quintile  | 1.0-1.2          | 0.86 (0.78-0.96)          |
| 3 <sup>rd</sup> quintile  | 1.3-1.4          | 0.87 (0.77-0.98)          |
| 4 <sup>th</sup> quintile  | 1.5-1.9          | 0.86 (0.77-0.95)          |
| 5 <sup>th</sup> quintile  | 2.0-28.6         | 0.89 (0.80-0.99)          |
| <b>Trend</b>              |                  | 0.053                     |
| <b>Ordinal regression</b> |                  | 0.97 (0.94-1.01)          |
| <b>PFHxS</b>              |                  | 0.96 (0.93-0.99)          |
| 1 <sup>st</sup> quintile  | 0.25-1.7         | Ref.                      |
| 2 <sup>nd</sup> quintile  | 1.8-2.6          | 1.01 (0.91-1.12)          |
| 3 <sup>rd</sup> quintile  | 2.7-3.6          | 1.02 (0.91-1.13)          |
| 4 <sup>th</sup> quintile  | 3.7-5.6          | 0.93 (0.84-1.04)          |
| 5 <sup>th</sup> quintile  | 5.7-232.6        | 0.89(0.79-0.99)           |
| <b>Trend</b>              |                  | 0.009                     |
| <b>Ordinal regression</b> |                  | 0.97 (0.94-0.99)          |

\*Model adjusted for age (one-year age bands), ethnicity, gender, and school level (categorical), household income (categorical), physical activity, alcohol consumption (categorical, none/<1drink/month, < 1 drink/week, few drinks/week, 1-3 drinks/day, >3 drinks/day, undetermined), and cigarette smoking (categorical, never, former, < 10 cig/day, 12-20 cig/day, 20+ cig/day)

Table 3: The association between PFAAs and self-report memory impairment in logistic regression for a doubling PFAA concentration, by quintiles of distribution, and in ordinal regression by diabetes status (validated by clinical records)

|                                | Range (ng/mL)   | OR (95% CI)*       | p for inter | N               | OR (95% CI)*       | p for inter |
|--------------------------------|-----------------|--------------------|-------------|-----------------|--------------------|-------------|
|                                | <b>PFOS</b>     |                    |             | <b>PFOA</b>     |                    |             |
|                                | <b>N=17,832</b> |                    |             | <b>N=17,832</b> |                    |             |
| <b>Non-diabetics</b>           |                 | 0.93 (0.90-0.96)†  | -           |                 | 0.95 (0.93-0.97) † | -           |
| <b>Ordinal regression</b>      |                 | 0.96 (0.93-0.99)   |             |                 | 0.96 (0.95-0.98)   |             |
| <b>1<sup>st</sup> quintile</b> | 0.25-14.5       | Ref.               |             | 0.25-14.3       | Ref.               |             |
| <b>2<sup>nd</sup> quintile</b> | 14.6-20.5       | 0.96 (0.86-1.08)   |             | 14.4-27.2       | 0.85 (0.76-0.95)   |             |
| <b>3<sup>rd</sup> quintile</b> | 20.6-27.0       | 0.90 (0.80-1.01)   |             | 27.3-54.3       | 0.82 (0.73-0.92)   |             |
| <b>4<sup>th</sup> quintile</b> | 27.1-37.1       | 0.88 (0.78-0.99)   |             | 54.4-119.1      | 0.76 (0.68-0.86)   |             |
| <b>5<sup>th</sup> quintile</b> | 37.2-759.2      | 0.85 (0.76-0.96)   |             | 119.2-8,416     | 0.75 (0.67-0.84)   |             |
| <b>Trend</b>                   |                 | 0.002              |             |                 | <0.001             |             |
|                                | <b>N=3,192</b>  |                    |             | <b>N=3,192</b>  |                    |             |
| <b>Diabetics</b>               |                 | 0.94 (0.88-1.02) † | 0.698       |                 | 1.02 (0.97-1.06) † | 0.014       |
| <b>Ordinal regression</b>      |                 | 0.95 (0.90-1.01)   |             |                 | 1.00 (0.97-1.04)   |             |
| <b>1<sup>st</sup> quintile</b> | 0.25-13.6       | Ref.               |             | 0.25-12.6       | Ref.               |             |
| <b>2<sup>nd</sup> quintile</b> | 13.7-20.0       | 1.06 (0.82-1.36)   |             | 12.7-25.4       | 1.04 (0.80-1.34)   |             |
| <b>3<sup>rd</sup> quintile</b> | 20.1-27.3       | 0.82 (0.63-1.06)   |             | 25.5-48.0       | 0.88 (0.67-1.14)   |             |
| <b>4<sup>th</sup> quintile</b> | 27.4-37.3       | 0.87 (0.67-1.13)   |             | 48.1-102.1      | 1.04 (0.80-1.35)   |             |
| <b>5<sup>th</sup> quintile</b> | 37.4-272.0      | 0.90 (0.69-1.17)   |             | 102.4-22,412    | 1.09 (0.84-1.42)   |             |
| <b>Trend</b>                   |                 | 0.162              |             |                 | 0.543              |             |
|                                | <b>PFNA</b>     |                    |             | <b>PFHxS</b>    |                    |             |
|                                | <b>N=17,832</b> |                    |             | <b>N=17,832</b> |                    |             |
| <b>Non-diabetics</b>           |                 | 0.95 (0.90-0.99) † | -           |                 | 0.96 (0.93-0.99) † | -           |
| <b>Ordinal regression</b>      |                 | 0.97 (0.93-1.01)   |             |                 | 0.97 (0.94-0.99)   |             |
| <b>1<sup>st</sup> quintile</b> | 0.25-0.9        | Ref.               |             | 0.25-1.8        | Ref.               |             |
| <b>2<sup>nd</sup> quintile</b> | 1.0-1.2         | 0.86 (0.77-0.97)   |             | 1.9-2.6         | 0.98 (0.87-1.10)   |             |
| <b>3<sup>rd</sup> quintile</b> | 1.3-1.5         | 0.85 (0.76-0.95)   |             | 2.7-3.7         | 0.99 (0.89-1.11)   |             |
| <b>4<sup>th</sup> quintile</b> | 1.6-1.9         | 0.83 (0.73-0.93)   |             | 3.8-5.7         | 0.93 (0.82-1.05)   |             |
| <b>5<sup>th</sup> quintile</b> | 2.0-28.6        | 0.88 (0.78-0.99)   |             | 5.8-232.6       | 0.88 (0.79-0.99)   |             |
| <b>Trend</b>                   |                 | 0.031              |             |                 | 0.029              |             |
|                                | <b>N=3,192</b>  |                    |             | <b>N=3,192</b>  |                    |             |
| <b>Diabetics</b>               |                 | 1.01 (0.90-1.13) † | 0.259       | 3,192           | 0.99 (0.92-1.06) † | 0.683       |
| <b>Ordinal regression</b>      |                 | 0.99 (0.91-1.09)   |             |                 |                    |             |
| <b>1<sup>st</sup> quintile</b> | 0.25-0.8        | Ref.               |             | 0.25-1.6        | Ref.               |             |
| <b>2<sup>nd</sup> quintile</b> | 0.9-1.1         | 1.06 (0.80-1.40)   |             | 1.7-2.3         | 1.06 (0.81-1.38)   |             |
| <b>3<sup>rd</sup> quintile</b> | 1.2-1.4         | 0.88 (0.66-1.17)   |             | 2.4-3.2         | 1.10 (0.85-1.42)   |             |
| <b>4<sup>th</sup> quintile</b> | 1.5-1.8         | 1.03 (0.77-1.36)   |             | 3.3-5.0         | 1.02 (0.79-1.33)   |             |
| <b>5<sup>th</sup> quintile</b> | 1.9-14.5        | 1.08(0.82-1.43)    |             | 5.1-99.7        | 1.00 (0.77-1.31)   |             |
| <b>Trend</b>                   |                 | 0.620              |             |                 | 0.942              |             |

\*using clinical record validated diagnosis of diabetes and self-reported use of medications, adjusted for age (one-year age bands), ethnicity, gender, school level (categorical), household income (categorical), physical activity, alcohol consumption (categorical, none/<1drink/month, < 1 drink/week, few drinks/week, 1-3 drinks/day, >3 drinks/day, undetermined), and cigarette smoking (categorical, never, former, < 10 cig/day, 12-20 cig/day, 20+ cig/day); † OR for doubling PFAA concentration

**Table 4: Sensitivity analysis of the association between PFAAs and self-report memory impairment for a doubling PFAA concentration, by quintiles of PFAAs, and in ordinal regression on subjects aged 65 years and older (n=7,097), and using any memory impairment as outcome measure (n=21,024).**

|                                | Range (ng/mL) | OR (95% C.I.) <sup>b</sup><br>N=7,097<br>Restricted to those<br>aged 65+* | Range (ng/mL) | OR (95% C.I.) <sup>b</sup><br>N=21,024<br>Any memory<br>impairment <sup>^</sup> |
|--------------------------------|---------------|---------------------------------------------------------------------------|---------------|---------------------------------------------------------------------------------|
| <b>PFOS</b>                    |               | 0.95 (0.90-1.00)                                                          |               | 0.96 (0.94-0.99)                                                                |
| <b>Ordinal regression</b>      |               | 0.98 (0.94-1.03)                                                          |               |                                                                                 |
| <b>1<sup>st</sup> quintile</b> | 0.25-15.3     | Ref.                                                                      | 0.25-14.4     | Ref.                                                                            |
| <b>2<sup>nd</sup> quintile</b> | 15.4-22.0     | 0.99 (0.83-1.20)                                                          | 14.5-20.4     | 0.96 (0.88-1.05)                                                                |
| <b>3<sup>rd</sup> quintile</b> | 22.1-28.9     | 0.95 (0.79-1.14)                                                          | 20.5-27.1     | 0.90 (0.82-0.98)                                                                |
| <b>4<sup>th</sup> quintile</b> | 29.0-4.0      | 0.97 (0.81-1.16)                                                          | 27.2-37.2     | 0.94 (0.86-1.03)                                                                |
| <b>5<sup>th</sup> quintile</b> | 40.1-759.2    | 0.84 (0.70-1.01)                                                          | 37.3-759.2    | 0.93 (0.85-1.02)                                                                |
| <b>Trend</b>                   |               | 0.079                                                                     |               | 0.121                                                                           |
| <b>PFOA</b>                    |               | 0.99 (0.97-1.03)                                                          |               | 0.97 (0.96-0.99)                                                                |
| <b>Ordinal regression</b>      |               | 1.00 (0.97-1.03)                                                          |               |                                                                                 |
| <b>1<sup>st</sup> quintile</b> | 0.25-15.0     | Ref.                                                                      | 0.25-14.0     | Ref.                                                                            |
| <b>2<sup>nd</sup> quintile</b> | 15.1-29.6     | 0.91 (0.75-1.09)                                                          | 14.1-27.0     | 0.90 (0.82-0.98)                                                                |
| <b>3<sup>rd</sup> quintile</b> | 29.7-56.8     | 0.90 (0.75-1.08)                                                          | 27.1-53.8     | 0.86 (0.79-0.94)                                                                |
| <b>4<sup>th</sup> quintile</b> | 56.9-123.0    | 0.84 (0.70-1.01)                                                          | 53.9-118.1    | 0.87 (0.79-0.95)                                                                |
| <b>5<sup>th</sup> quintile</b> | 123.1-5,994.8 | 0.99(0.83-1.19)                                                           | 118.3-22,412  | 0.85 (0.78-0.93)                                                                |
| <b>Tend</b>                    |               | 0.680                                                                     |               | <0.001                                                                          |
| <b>PFNA</b>                    |               | 0.95 (0.87-1.02)                                                          |               | 0.98 (0.95-1.02)                                                                |
| <b>Ordinal regression</b>      |               | 0.99 (0.93-1.07)                                                          |               |                                                                                 |
| <b>1<sup>st</sup> quintile</b> | 0.25-0.8      | Ref.                                                                      | 0.25-0.90     | Ref.                                                                            |
| <b>2<sup>nd</sup> quintile</b> | 0.9-1.1       | 0.88 (0.73-1.06)                                                          | 1.0-1.2       | 0.89 (0.82-0.97)                                                                |
| <b>3<sup>rd</sup> quintile</b> | 1.2-1.4       | 0.81 (0.67-0.98)                                                          | 1.3-1.4       | 0.94(0.85-1.04)                                                                 |
| <b>4<sup>th</sup> quintile</b> | 1.5-1.8       | 0.82 (0.68-0.99)                                                          | 1.5-1.9       | 0.92 (0.85-1.01)                                                                |
| <b>5<sup>th</sup> quintile</b> | 1.9-11.7      | 0.88 (0.73-1.07)                                                          | 2.0-28.6      | 0.94 (0.86-1.03)                                                                |
| <b>Trend</b>                   |               | 0.177                                                                     |               | 0.493                                                                           |
| <b>PFHxS</b>                   |               | 0.96 (0.91-1.01)                                                          |               | 0.97 (0.94-0.99)                                                                |
| <b>Ordinal regression</b>      |               | 0.98 (0.93-1.02)                                                          |               |                                                                                 |
| <b>1<sup>st</sup> quintile</b> | 0.25-1.9      | Ref.                                                                      | 0.25-1.7      | Ref.                                                                            |
| <b>2<sup>nd</sup> quintile</b> | 2.0-2.8       | 0.98 (0.82-1.18)                                                          | 1.8-2.6       | 0.98 (0.90-1.07)                                                                |
| <b>3<sup>rd</sup> quintile</b> | 2.9-3.9       | 0.95 (0.79-1.15)                                                          | 2.7-3.6       | 1.03 (0.94-1.13)                                                                |
| <b>4<sup>th</sup> quintile</b> | 4.0-6.0       | 0.98 (0.82-1.17)                                                          | 3.7-5.6       | 0.96 (0.87-1.04)                                                                |
| <b>5<sup>th</sup> quintile</b> | 6.1-232.6     | 0.86 (0.71-1.03)                                                          | 5.7-232.6     | 0.89 (0.81-0.97)                                                                |
| <b>Trend</b>                   |               | 0.139                                                                     |               | 0.010                                                                           |

<sup>b</sup>Model 2 includes age (one-year age bands), ethnicity, gender, and school level (categorical), household income (categorical), physical activity, alcohol consumption (categorical, none/<1drink/month, < 1 drink/week, few drinks/week, 1-3 drinks/day, >3 drinks/day, undetermined), and cigarette smoking (categorical, never, former, < 10 cig/day, 12-20 cig/day, 20+ cig/day)

\* Sensitivity analysis including subjects aged 65 years or older only (N=7,097)

<sup>^</sup> Sensitivity analysis using a more restrictive definition of memory impairment (those reporting frequent episode of short-term memory loss only, cases = 1,115)

1  
2  
3  
4  
5  
6  
7  
8  
9  
10  
11  
12  
13  
14  
15  
16  
17  
18  
19  
20  
21  
22  
23  
24  
25  
26  
27  
28  
29  
30  
31  
32  
33  
34  
35  
36  
37  
38  
39  
40  
41  
42  
43  
44  
45  
46  
47  
48  
49  
50  
51  
52  
53  
54  
55  
56  
57  
58  
59  
60



Figure 1: Prevalence of self-reported short-term memory impairment by age and sex in the study population  
203x162mm (96 x 96 DPI)

Online Table 1: The association between PFAAs and self-reported memory impairment in logistic regression for a doubling PFAA concentration, by quintiles of PFAAs, and in ordinal regression (n=21,024).

|                           | Range<br>(ng/mL) | Model 1 <sup>a</sup> | Model 2 <sup>b</sup> | Model 3 <sup>c</sup> |
|---------------------------|------------------|----------------------|----------------------|----------------------|
| <b>PFOS</b>               |                  | 0.92 (0.89-0.95)     | 0.93 (0.90-0.96)     | 0.93 (0.90-0.96)     |
| <b>Ordinal regression</b> |                  | 0.95 (0.92-0.97)     | 0.95 (0.93-0.98)     | 0.96 (0.93-0.98)     |
| 1 <sup>st</sup> quintile  | 0.25-14.4        | Ref.                 | Ref.                 | Ref.                 |
| 2 <sup>nd</sup> quintile  | 14.5-20.4        | 0.95 (0.85-1.05)     | 0.96 (0.87-1.07)     | 0.97 (0.88-1.08)     |
| 3 <sup>rd</sup> quintile  | 20.5-27.1        | 0.84 (0.76-0.93)     | 0.86 (0.78-0.96)     | 0.87 (0.79-0.97)     |
| 4 <sup>th</sup> quintile  | 27.2-37.2        | 0.83 (0.75-0.93)     | 0.87 (0.78-0.96)     | 0.88 (0.79-0.97)     |
| 5 <sup>th</sup> quintile  | 37.3-759.2       | 0.81 (0.73-0.91)     | 0.85 (0.76-0.94)     | 0.86 (0.77-0.96)     |
| <b>Trend</b>              |                  | <0.001               | <0.001               | 0.001                |
| <b>PFOA</b>               |                  | 0.95 (0.94-0.97)     | 0.96 (0.94-0.98)     | 0.96 (0.94-0.98)     |
| <b>Ordinal regression</b> |                  | 0.97 (0.95-0.98)     | 0.97 (0.96-0.98)     | 0.97 (0.96-0.99)     |
| 1 <sup>st</sup> quintile  | 0.25-14.0        | Ref.                 | Ref.                 | Ref.                 |
| 2 <sup>nd</sup> quintile  | 14.1-27.0        | 0.86 (0.78-0.96)     | 0.88 (0.79-0.97)     | 0.88 (0.80-0.98)     |
| 3 <sup>rd</sup> quintile  | 27.1-53.8        | 0.82 (0.74-0.91)     | 0.83 (0.75-0.92)     | 0.84 (0.76-0.93)     |
| 4 <sup>th</sup> quintile  | 53.9-118.1       | 0.77 (0.70-0.86)     | 0.79 (0.71-0.88)     | 0.81 (0.73-0.90)     |
| 5 <sup>th</sup> quintile  | 118.3-22,412     | 0.76 (0.69-0.85)     | 0.79 (0.71-0.88)     | 0.80 (0.72-0.90)     |
| <b>Trend</b>              |                  | <0.001               | <0.001               | <0.001               |
| <b>PFNA</b>               |                  | 0.94 (0.90-0.98)     | 0.96 (0.91-1.00)     | 0.96 (0.92-1.01)     |
| <b>Ordinal regression</b> |                  | 0.96 (0.93-0.99)     | 0.97 (0.94-1.01)     | 0.98 (0.94-1.01)     |
| 1 <sup>st</sup> quintile  | 0.25-0.90        | Ref.                 | Ref.                 | Ref.                 |
| 2 <sup>nd</sup> quintile  | 1.0-1.2          | 0.85 (0.77-0.94)     | 0.86 (0.78-0.96)     | 0.87 (0.78-0.96)     |
| 3 <sup>rd</sup> quintile  | 1.3-1.4          | 0.85 (0.76-0.95)     | 0.87 (0.77-0.98)     | 0.88 (0.78-0.98)     |
| 4 <sup>th</sup> quintile  | 1.5-1.9          | 0.83 (0.75-0.92)     | 0.86 (0.77-0.95)     | 0.86 (0.78-0.95)     |
| 5 <sup>th</sup> quintile  | 2.0-28.6         | 0.85 (0.76-0.94)     | 0.89 (0.80-0.99)     | 0.90 (0.81-1.01)     |
| <b>Trend</b>              |                  | 0.004                | 0.053                | 0.079                |
| <b>PFHxS</b>              |                  | 0.95 (0.92-0.98)     | 0.96 (0.93-0.99)     | 0.97 (0.94-1.00)     |
| <b>Ordinal regression</b> |                  | 0.96 (0.94-0.99)     | 0.97 (0.94-0.99)     | 0.97 (0.95-0.99)     |
| 1 <sup>st</sup> quintile  | 0.25-1.7         | Ref.                 | Ref.                 | Ref.                 |
| 2 <sup>nd</sup> quintile  | 1.8-2.6          | 1.00 (0.90-1.11)     | 1.01 (0.91-1.12)     | 1.02 (0.91-1.13)     |
| 3 <sup>rd</sup> quintile  | 2.7-3.6          | 1.00 (0.90-1.11)     | 1.02 (0.91-1.13)     | 1.03 (0.93-1.15)     |
| 4 <sup>th</sup> quintile  | 3.7-5.6          | 0.91 (0.82-1.02)     | 0.93 (0.84-1.04)     | 0.96 (0.86-1.06)     |
| 5 <sup>th</sup> quintile  | 5.7-232.6        | 0.86 (0.77-0.96)     | 0.89(0.79-0.99)      | 0.92 (0.82-1.02)     |
| <b>Trend</b>              |                  | 0.001                | 0.009                | 0.053                |

Online Table 2: The association between PFAAs and self-report memory impairment for a doubling PFAA concentration and by tertiles of distribution by self-reported anti-diabetic treatment

|                               | Range (ng/ML) | N     | PFOS<br>OR (95% CI)* | Range (ng/ML) | PFOA<br>OR (95% CI)* | Range (ng/ML) | PFNA<br>OR (95% CI)* | Range (ng/ML) | PFHxS<br>OR (95% CI)* |
|-------------------------------|---------------|-------|----------------------|---------------|----------------------|---------------|----------------------|---------------|-----------------------|
| <b>Thiazolidinedione use</b>  |               | 809   | 1.00 (0.86-1.16)     |               | 0.97 (0.88-1.07)     |               | 0.94 (0.74-1.19)     |               | 1.02 (0.87-1.20)      |
| <b>Ordinal regression</b>     |               |       | 1.06 (0.93-1.20)     |               | 1.03 (0.95-1.11)     |               | 1.02 (0.84-1.25)     |               | 1.05 (0.92-1.20)      |
| <b>1<sup>st</sup> tertile</b> | 0.25-17.9     |       | Ref.                 | 1.1-17.5      | Ref.                 | 0.25-1.0      | Ref.                 | 0.25-1.9      | Ref.                  |
| <b>2<sup>nd</sup> tertile</b> | 18.0-29.9     |       | 0.76 (0.50-1.16)     | 17.6-49.7     | 0.72 (0.47-1.10)     | 1.1-1.5       | 0.83 (0.54-1.26)     | 2.0-3.5       | 1.56 (1.02-2.38)      |
| <b>3<sup>rd</sup> tertile</b> | 30.1-104.9    |       | 0.93 (0.61-1.42)     | 19.9-8,068    | 0.81 (0.53-1.24)     | 1.6-14.7      | 0.79 (0.51-1.23)     | 3.6-84.0      | 1.13 (0.72-1.77)      |
| <b>p-value for trend</b>      |               |       | 0.737                |               | 0.333                |               | 0.309                |               | 0.628                 |
| <b>Other medications</b>      |               | 1,244 | 0.90 (0.80-1.01)     |               | 1.00 (0.93-1.07)     |               | 0.95 (0.79-1.15)     |               | 0.91 (0.81-1.03)      |
| <b>Ordinal regression</b>     |               |       | 0.92 (0.83-1.01)     |               | 1.00 (0.93-1.07)     |               | 0.94 (0.81-1.10)     |               | 0.94 (0.86-1.04)      |
| <b>1<sup>st</sup> tertile</b> | 0.25-17.9     |       | Ref.                 | 0.25-20.5     | Ref.                 | 0.25-1.1      | Ref.                 | 0.25-2.1      | Ref.                  |
| <b>2<sup>nd</sup> tertile</b> | 18.0-29.8     |       | 0.75 (0.54-1.04)     | 20.6-63.2     | 0.99 (0.71-1.39)     | 1.2-1.6       | 0.72 (0.52-1.01)     | 2.2-3.6       | 0.99 (0.71-1.38)      |
| <b>3<sup>rd</sup> tertile</b> | 29.9-218.0    |       | 0.68 (0.48-0.95)     | 63.4-2,316.2  | 0.92 (0.66-1.29)     | 1.7-6.0       | 0.85 (0.61-1.20)     | 3.7-99.7      | 0.82 (0.58-1.16)      |
| <b>p-value for trend</b>      |               |       | 0.023                |               | 0.644                |               | 0.341                |               | 0.259                 |
| <b>No medication</b>          |               | 1,390 | 0.95 (0.85-1.07)     |               | 1.00 (0.94-1.08)     |               | 1.03 (0.87-1.23)     |               | 1.01 (0.90-1.13)      |
| <b>Ordinal regression</b>     |               |       | 0.94 (0.86-1.03)     |               | 1.00 (0.95-1.06)     |               | 0.98 (0.85-1.13)     |               | 0.99 (0.90-1.08)      |
| <b>1<sup>st</sup> tertile</b> | 0.25-18.3     |       | Ref.                 | 0.7-20.2      | Ref.                 | 0.25-1.0      | Ref.                 | 0.25-2.1      | Ref.                  |
| <b>2<sup>nd</sup> tertile</b> | 18.4-29.3     |       | 1.11 (0.81-1.52)     | 20.3-63.4     | 1.05 (0.77-1.44)     | 1.1-1.5       | 1.01 (0.72-1.40)     | 2.2-3.7       | 0.93 (0.68-1.28)      |
| <b>3<sup>rd</sup> tertile</b> | 29.4-272.0    |       | 1.02 (0.74-1.40)     | 63.5-22,412   | 0.99 (0.72-1.37)     | 1.6-14.5      | 1.12 (0.81-1.54)     | 3.8-43.3      | 0.99 (0.72-1.37)      |
| <b>p-value for trend</b>      |               |       | 0.897                |               | 0.984                |               | 0.473                |               | 0.957                 |

\*using clinical record validated diagnosis of diabetes and self-reported use of medications, adjusted for age (one-year age bands), ethnicity, gender, school level (categorical), household income (categorical), physical activity, alcohol consumption (categorical, none/<1drink/month, < 1 drink/week, few drinks/week, 1-3 drinks/day, >3 drinks/day, undetermined), and cigarette smoking (categorical, never, former, < 10 cig/day, 12-20 cig/day, 20+ cig/day); † OR for doubling PFAA concentration



**Table S1**

(Gallo et al. [2011] PLoS Med; doi:10.1371/journal.pmed.1001117)

| The Strengthening the Reporting Observational studies in Epidemiology – Molecular Epidemiology (STROBE-ME) Reporting Recommendations: Extended from STROBE statement |             |                                                                                                                                                                                                                                                                                                                                                                                                                                                                                                                                                                                                                                                                                 |                                                                                                                                                                                                                                      |
|----------------------------------------------------------------------------------------------------------------------------------------------------------------------|-------------|---------------------------------------------------------------------------------------------------------------------------------------------------------------------------------------------------------------------------------------------------------------------------------------------------------------------------------------------------------------------------------------------------------------------------------------------------------------------------------------------------------------------------------------------------------------------------------------------------------------------------------------------------------------------------------|--------------------------------------------------------------------------------------------------------------------------------------------------------------------------------------------------------------------------------------|
| Item                                                                                                                                                                 | Item number | STROBE Guidelines                                                                                                                                                                                                                                                                                                                                                                                                                                                                                                                                                                                                                                                               | Extension for Molecular Epidemiology Studies (STROBE-ME)                                                                                                                                                                             |
| <b>Title and abstract</b>                                                                                                                                            | <b>1</b>    | <p>(a) Indicate the study's design with a commonly used term in the title or the abstract</p> <p>(b) Provide in the abstract an informative and balanced summary of what was done and what was found</p>                                                                                                                                                                                                                                                                                                                                                                                                                                                                        | <b>ME-1</b> State the use of specific biomarker(s) in the title and/or in the abstract if they contribute substantially to the findings                                                                                              |
| <b>Introduction</b>                                                                                                                                                  |             |                                                                                                                                                                                                                                                                                                                                                                                                                                                                                                                                                                                                                                                                                 |                                                                                                                                                                                                                                      |
| Background rationale                                                                                                                                                 | <b>2</b>    | Explain the scientific background and rationale for the investigation being reported                                                                                                                                                                                                                                                                                                                                                                                                                                                                                                                                                                                            | <b>ME-2</b> Explain in the scientific background of the study how/why the specific biomarker(s) have been chosen, potentially among many others (e.g., others are studied but reported elsewhere, or not studied at all)             |
| Objectives                                                                                                                                                           | <b>3</b>    | State specific objectives, including any pre-specified hypotheses                                                                                                                                                                                                                                                                                                                                                                                                                                                                                                                                                                                                               | <b>ME-3</b> <i>A priori</i> hypothesis: if one or more biomarkers are used as proxy measures, state the <i>a priori</i> hypothesis on the expected values of the biomarker(s)                                                        |
| <b>Methods</b>                                                                                                                                                       |             |                                                                                                                                                                                                                                                                                                                                                                                                                                                                                                                                                                                                                                                                                 |                                                                                                                                                                                                                                      |
| Study design                                                                                                                                                         | <b>4</b>    | Present key elements of study design early in the paper                                                                                                                                                                                                                                                                                                                                                                                                                                                                                                                                                                                                                         | <b>ME-4</b> Describe the special study designs for molecular epidemiology (in particular nested case/control and case/cohort) and how they were implemented                                                                          |
| <i>Biological sample collection</i>                                                                                                                                  |             |                                                                                                                                                                                                                                                                                                                                                                                                                                                                                                                                                                                                                                                                                 | <b>ME-4.1</b> Report on the setting of the biological sample collection; amount of sample; nature of collecting procedures; participant conditions; time between sample collection and relevant clinical or physiological endpoints. |
| <i>Biological sample storage</i>                                                                                                                                     |             |                                                                                                                                                                                                                                                                                                                                                                                                                                                                                                                                                                                                                                                                                 | <b>ME-4.2</b> Describe sample processing (centrifugation, timing, additives, etc).                                                                                                                                                   |
| <i>Biological sample processing</i>                                                                                                                                  |             |                                                                                                                                                                                                                                                                                                                                                                                                                                                                                                                                                                                                                                                                                 | <b>ME-4.3</b> Describe sample storage until biomarker analysis (storage, thawing, manipulation, etc).                                                                                                                                |
| <i>Biomarker biochemical characteristics</i>                                                                                                                         |             |                                                                                                                                                                                                                                                                                                                                                                                                                                                                                                                                                                                                                                                                                 | <b>ME-4.4</b> Report the half-life of the biomarker, and chemical and physical characteristics (e.g., solubility).                                                                                                                   |
| Setting                                                                                                                                                              | <b>5</b>    | Describe the setting, locations, and relevant dates, including periods of recruitment, exposure, follow-up, and data collection                                                                                                                                                                                                                                                                                                                                                                                                                                                                                                                                                 |                                                                                                                                                                                                                                      |
| Participants                                                                                                                                                         | <b>6</b>    | <p>(a) Cohort study—Give the eligibility criteria, and the sources and methods of selection of participants. Describe methods of follow-up</p> <p>Case-control study—Give the eligibility criteria, and the sources and methods of case ascertainment and control selection. Give the rationale for the choice of cases and controls</p> <p>Cross-sectional study—Give the eligibility criteria, and the sources and methods of selection of participants</p> <p>(b) Cohort study—For matched studies, give matching criteria and number of exposed and unexposed</p> <p>Case-control study—For matched studies, give matching criteria and the number of controls per case</p> | <b>ME-6</b> Report any habit, clinical conditions, physiological factor, or working or living condition that might affect the characteristics or concentrations of the biomarker                                                     |
| Variables                                                                                                                                                            | <b>7</b>    | Clearly define all outcomes, exposures, predictors, potential confounders, and effect modifiers. Give diagnostic criteria, if applicable                                                                                                                                                                                                                                                                                                                                                                                                                                                                                                                                        |                                                                                                                                                                                                                                      |
| Data source/measurement                                                                                                                                              | <b>8</b>    | For each variable of interest, give sources of data and details of methods of assessment (measurement). Describe comparability of assessment methods if there is more than one group                                                                                                                                                                                                                                                                                                                                                                                                                                                                                            | <b>ME-8</b> Laboratory methods: report type of assay used, detection limit, quantity of biological sample used, outliers, timing in the assay procedures (when applicable) and calibration procedures or any standard used           |
| Bias                                                                                                                                                                 | <b>9</b>    | Describe any efforts to address potential sources of bias                                                                                                                                                                                                                                                                                                                                                                                                                                                                                                                                                                                                                       |                                                                                                                                                                                                                                      |
| Study size                                                                                                                                                           | <b>10</b>   | Explain how the study size was arrived at                                                                                                                                                                                                                                                                                                                                                                                                                                                                                                                                                                                                                                       |                                                                                                                                                                                                                                      |
| Quantitative variables                                                                                                                                               | <b>11</b>   | Explain how quantitative variables were handled in the analyses. If applicable, describe which groupings were chosen, and why                                                                                                                                                                                                                                                                                                                                                                                                                                                                                                                                                   |                                                                                                                                                                                                                                      |
| Statistical methods                                                                                                                                                  | <b>12</b>   | <p>(a) Describe all statistical methods, including those used to control for confounding</p> <p>(b) Describe any methods used to examine subgroups and interactions</p> <p>(c) Explain how missing data were addressed</p> <p>(d) Cohort study—If applicable, explain how loss to follow-up was addressed</p> <p>Case-control study—If applicable, explain how matching of cases and controls was addressed</p> <p>Cross-sectional study—If applicable, describe analytical methods taking account of sampling strategy</p> <p>(e) Describe any sensitivity analyses</p>                                                                                                        | <b>ME-12</b> Describe how biomarkers were introduced into statistical models                                                                                                                                                         |

|                                                                      |           |                                                                                                                                                                                                                                                                                                                                                                                                                 |                                                                                                                                                                                |
|----------------------------------------------------------------------|-----------|-----------------------------------------------------------------------------------------------------------------------------------------------------------------------------------------------------------------------------------------------------------------------------------------------------------------------------------------------------------------------------------------------------------------|--------------------------------------------------------------------------------------------------------------------------------------------------------------------------------|
| Validity/reliability of measurement and internal/external validation |           |                                                                                                                                                                                                                                                                                                                                                                                                                 | <b>ME-12.1</b> Report on the validity and reliability of measurement of the biomarker(s) coming from the literature and any internal or external validation used in the study. |
| <b>Results</b>                                                       |           |                                                                                                                                                                                                                                                                                                                                                                                                                 |                                                                                                                                                                                |
| Participants                                                         | <b>13</b> | (a) Report the numbers of individuals at each stage of the study—e.g., numbers potentially eligible, examined for eligibility, confirmed eligible, included in the study, completing follow-up, and analysed<br>(b) Give reasons for non-participation at each stage<br>(c) Consider use of a flow diagram                                                                                                      | <b>ME-13</b> Give reason for loss of biological samples at each stage                                                                                                          |
| Descriptive data                                                     | <b>14</b> | (a) Give characteristics of study participants (e.g., demographic, clinical, social) and information on exposures and potential confounders<br>(b) Indicate the number of participants with missing data for each variable of interest<br>(c) Cohort study—Summarise follow-up time (e.g., average and total amount)                                                                                            |                                                                                                                                                                                |
| Distribution of biomarker measurement                                |           |                                                                                                                                                                                                                                                                                                                                                                                                                 | <b>ME-14.1</b> Give the distribution of the biomarker measurement (including mean, median, range, and variance)                                                                |
| Outcome data                                                         | <b>15</b> | Cohort study—Report numbers of outcome events or summary measures over time<br>Case-control study—Report numbers in each exposure category, or summary measures of exposure<br>Cross-sectional study—Report numbers of outcome events or summary measures                                                                                                                                                       |                                                                                                                                                                                |
| Main results                                                         | <b>16</b> | (a) Give unadjusted estimates and, if applicable, confounder-adjusted estimates and their precision (e.g., 95% confidence interval). Make clear which confounders were adjusted for and why they were included<br>(b) Report category boundaries when continuous variables were categorized<br>(c) If relevant, consider translating estimates of relative risk into absolute risk for a meaningful time period |                                                                                                                                                                                |
| Other analyses                                                       | <b>17</b> | Report other analyses done—e.g., analyses of subgroups and interactions, and sensitivity analyses                                                                                                                                                                                                                                                                                                               |                                                                                                                                                                                |
| <b>Discussion</b>                                                    |           |                                                                                                                                                                                                                                                                                                                                                                                                                 |                                                                                                                                                                                |
| Key results                                                          | <b>18</b> | Summarise key results with reference to study objectives                                                                                                                                                                                                                                                                                                                                                        |                                                                                                                                                                                |
| Limitations                                                          | <b>19</b> | Discuss limitations of the study, taking into account sources of potential bias or imprecision. Discuss both direction and magnitude of any potential bias                                                                                                                                                                                                                                                      | <b>ME-19</b> Describe main limitations in laboratory procedures                                                                                                                |
| Interpretation                                                       | <b>20</b> | Give a cautious overall interpretation of results considering objectives, limitations, multiplicity of analyses, results from similar studies, and other relevant evidence                                                                                                                                                                                                                                      | <b>ME-20</b> Give an interpretation of results in terms of <i>a-priori</i> biological plausibility                                                                             |
| Generalisability                                                     | <b>21</b> | Discuss the generalisability (external validity) of the study results                                                                                                                                                                                                                                                                                                                                           |                                                                                                                                                                                |
| <b>Other information</b>                                             |           |                                                                                                                                                                                                                                                                                                                                                                                                                 |                                                                                                                                                                                |
| Funding                                                              | <b>22</b> | Give the source of funding and the role of the funders for the present study and, if applicable, for the original study on which the present article is based                                                                                                                                                                                                                                                   |                                                                                                                                                                                |
| Ethics                                                               |           |                                                                                                                                                                                                                                                                                                                                                                                                                 | <b>ME-22.1</b> Describe informed consent and approval from ethical committee(s). Specify whether samples were anonymous, anonymised or identifiable                            |

1  
2  
3 **Serum perfluoroalkyl acids concentrations and memory impairment in a large cross-sectional**  
4 **study**  
5

6 Valentina Gallo<sup>1,2</sup>, Giovanni Leonardi<sup>1</sup>, Carol Brayne<sup>3</sup>, Ben Armstrong<sup>1</sup>, Tony Fletcher<sup>1</sup>  
7  
8  
9

- 10  
11  
12 1. Social and Environmental Health Research, London School of Hygiene and Tropical Medicine, London  
13 (UK)  
14 2. Centre for Primary Care and Public Health, Blizard Institute, Queen Mary, University of London,  
15 London (UK)  
16 3. University of Cambridge, Cambridge (UK)  
17  
18  
19  
20  
21  
22

23 **Please send the correspondence to:**  
24

25 Dr Valentina Gallo, MD, MSc, PhD  
26 London School of Hygiene and Tropical Medicine  
27 Faculty of Public Health and Policy  
28 15-17 Tavistock place  
29 WC1H 9SH London  
30 Tel +44/(0)20/7927 2779  
31 Email: valentina.gallo@lshtm.ac.uk  
32  
33  
34  
35  
36  
37  
38  
39  
40

41 **Key words:** memory disorders [MeSH], prefluoroalkyl acids, perfluorooctanoic acid [MeSH], C8  
42 Health Panel Study  
43

44 **Running title:** perfluoroalkyl acids and memory impairment  
45

46 **Word count:** 3,251460  
47  
48  
49  
50  
51  
52  
53  
54  
55  
56  
57  
58  
59  
60

## Summary

### Article focus

- Cross-sectional association between serum level of Perfluorooctanate (PFOA), perfluorooctane sulfonate (PFOS), perfluorononanoic acid (PFNA) and perfluorohexane sulfonate (PFHxS) and self-reported memory impairment in a population exposed to high levels of PFOA
- Potential interaction between the association of [perfluoroalkyl acids \(PFAAs\)](#) ~~perfluoroclorinated compound~~ with memory impairment by diabetes status

### Key Message

- Inverse associations between PFOS and PFOA and memory impairment were ~~highly~~ statistically significant ~~suggesting perhaps due to~~ a potential anti-inflammatory effect exerted through PPAR agonism. Comparable inverse associations with PFNA and PFHxS were of borderline statistical significance
- Inverse associations of PFAAs with memory impairment were weaker or non-existent in diabetics than overall in non-diabetics. Analysis further stratified by specific diabetes medication use showed no variation in odds ratios more than explicable by chance given the number of tests made.

### Strengths and limitations

- Very large sample size including 21,024 adults with measured serum level of [Perfluoroalkyl acids \(PFAAs\)](#) ~~perfluorinated compounds~~ with a given geographical distribution allowing some multilevel modelling
- The cross-sectional nature of the design does not allow any causal inference and makes results particularly prone to reverse causality
- Self-reported is not an optimal method for estimating the degree of memory impairment in a population

**ABSTRACT**

**Objectives** – To examine the cross-sectional association between serum PFOA, PFOS, PFNA, and PFHxS concentrations with self-reported memory impairment in adults and the interaction of these associations with diabetes status

**Design** - Cross-sectional study

**Setting** – Population-based in Mid-Ohio Valley, West Virginia following contamination by a chemical plant

**Participants** - The C8 Health Project collected data and measured serum level of ~~prefluoroclorinated compounds~~ PFAAs of 21,024 adults aged 50+ years

**Primary and secondary outcome measures** – Self-reported memory impairment as defined by the question “have experienced short term memory loss?”

**Results** - A total of 4,057 subjects self-reported short-term memory impairment. Inverse associations between PFOS and PFOA and memory impairment were highly statistically significant with fully adjusted OR=0.93 (95% C.I. 0.90-0.96) for doubling PFOS and OR=0.96 (95% C.I. 0.94-0.98) for doubling PFOA concentrations. Comparable inverse associations with PFNA and PFHxS were of borderline statistical significance. Inverse associations of PFAAs with memory impairment were weaker or non-existent in diabetics than overall in non-diabetics.

**Conclusion** - An inverse association between PFAA serum levels and self-reported memory impairment has been observed in this large population-based, cross-sectional study stronger and more statistically significant for PFOA and PFOS. The associations can be potentially explained by preventive anti-inflammatory effect exerted by a PPAR agonist effect of these PFAAs, but confounding or even reverse causation cannot be excluded as an alternative explanation.

## INTRODUCTION

Perfluoroalkyl acids (PFAAs) are man-made compounds used during the manufacture of fluoropolymers including non-stick cookware and breathable, yet waterproof, fabrics. They can also result from the metabolism of fluorinated telomers, compounds used for food package coatings, carpet treatments, and stain-resistant fabric treatment. Perfluorooctanate (PFOA), perfluorooctane sulfonate (PFOS), perfluorononanoic acid (PFNA) and perfluorohexane sulfonate (PFHxS) persist in the environment and are found in the blood of humans and many animal species throughout the world<sup>1,2</sup>. Potential sources of exposure to PFAAs in humans include drinking water, dust, breast milk, [fish and other foods](#), food packaging, ambient air, and occupational exposure<sup>3-6</sup>.

In animal models, perfluoroalkyl chemicals can activate peroxisome proliferator-activated receptor alpha (PPAR $\alpha$ ), a ligand-activated transcription factor that regulates gene expression, lipid modulation, glucose homeostasis, cell proliferation and inflammation<sup>7,8</sup>. The PPAR receptor has been involved in the ageing process: PPAR $\alpha$  null mice showed a decreased longevity compared with the wild-type due to non-neoplastic spontaneous ageing lesions which occurred with a higher incidence and a short latency in the PPAR $\alpha$  null mice<sup>9</sup>. Also PPAR $\gamma$  variants were reported to be associated with longevity in humans with low insulin resistance<sup>10,11</sup>. Activation of the PPAR $\gamma$  receptor *in vitro* and *in vivo* also prevents the expression of inflammatory cytokines and other inflammatory mediators in brains of Alzheimer disease animal models<sup>12,13</sup>. In addition, PPAR $\gamma$  agonists have been demonstrated to suppress the A $\beta$ -mediated activation of microglia *in vitro* and prevent cortical or hippocampal neuronal cell death<sup>14-16</sup>. PPAR $\gamma$  is also deeply involved in diabetes, given its ability to orchestrate the expression of genes involved in lipid metabolism, adipogenesis, and inflammation. It is activated by endogenous ligands (such as fatty acids and prostaglandins) or drugs such as thiazolidinedione. It is most highly expressed in adipocytes where it acts as the master regulator of adipogenesis via induction of adipogenic genes<sup>17</sup>. [However, a study \*in vitro\* showed that PFOA and PFOS activate differentially PPAR \$\alpha\$  and PPAR \$\gamma\$  receptors, but it is not possible to directly extrapolate these results to toxicity studies \*in vivo\*](#)<sup>18</sup>. Therefore, in line with what was recently observed by Power et al<sup>19</sup>, we hypothesised that increased exposure to PFAA could be associated with a better cognitive function.

The positive association between diabetes and cognitive impairment is well established<sup>20</sup>; some studies investigating the association between PFOA exposure and diabetes suggested the presence of an inverse association: a negative trend in diabetes occurrence by increasing serum PFOA deciles

1  
2  
3 was found in a case-control study nested in a previous study based on the population investigated  
4 here <sup>21 22</sup>; but not in others <sup>23 24</sup>.

5  
6  
7 From 1950-2005, a chemical plant in the Mid-Ohio Valley, West Virginia was responsible for emitting  
8 PFOA into the surrounding environment. In 2001, a group of residents from the nearby West Virginia  
9 and Ohio communities filed a class action lawsuit alleging health damage from drinking water  
10 supplies drawing on PFOA-contaminated groundwater <sup>25</sup>. Part of the pre-trial settlement of the class  
11 action lawsuit included a baseline survey, the C8 Health Project, conducted in 2005-2006, that  
12 gathered data from over 69,000 people from six contaminated water districts surrounding the plant  
13 <sup>25</sup>. In this population, PFOA concentrations ranged from US background levels to very high; overall  
14 PFOA levels are much higher in this population (geometric mean 42.6.0 ng/mL, 95% C.I. 41.8-43.3)  
15 than in the corresponding US population surveys (NHANES in same year mean 3.95 ng/mL, 95% C.I.  
16 3.65-4.27) <sup>1 25</sup>. The mean PFOS (geometric mean 22.4, 95% C.I. 22.2-22.6), PFNA (1.37, 95% C.I. 1.36-  
17 1.38), and PFHxS (3.18, 95% C.I. 3.15-3.22) closely resembled values from a nationally representative  
18 US sample from a similar time frame (mean PFOS 20.7, 95% C.I. 19.2-22.3; mean PFNA 0.97, 95% C.I.  
19 0.82-1.14; and PFHxS 1.93, 95% C.I. 1.73-2.16) <sup>1</sup>.

20  
21  
22 The present study uses these data to examine the cross-sectional association between serum PFOA,  
23 PFOS, PFNA, and PFHxS concentrations with self-reported memory impairment in adults, and its  
24 potential interaction with diabetes status.  
25  
26  
27  
28  
29

## 30 31 32 33 34 35 36 37 **METHODS**

### 38 39 40 **The Study population**

41 This study is one of the C8 Science Panel Studies and uses information from questionnaires and  
42 blood tests collected in the C8 Health Project, supplemented by further information on classification  
43 by water district developed in a companion C8 Science Panel Study.  
44  
45  
46  
47  
48

49 The C8 Health Project enrolled eligible subjects between August 2005 and August 2006. Individuals  
50 were eligible to participate in the C8 Health Project if they had consumed water for at least one year  
51 between 1950 and December 3, 2004 while living, working, or going to school in one of the following  
52 six water districts: Little Hocking Water Association of Ohio; City of Belpre, Ohio; Tupper Plains-  
53 Chester District of Ohio; Village of Pomeroy, Ohio; Lubeck Public Service District of West Virginia;  
54 Mason County Public Service District of West Virginia; or private water sources within  
55  
56  
57  
58  
59  
60

1  
2  
3  
4  
5  
6  
7  
8  
9  
10  
11  
12  
13  
14  
15  
16  
17  
18  
19  
20  
21  
22  
23  
24  
25  
26  
27  
28  
29  
30  
31  
32  
33  
34  
35  
36  
37  
38  
39  
40  
41  
42  
43  
44  
45  
46  
47  
48  
49  
50  
51  
52  
53  
54  
55  
56  
57  
58  
59  
60

aforementioned districts and areas of documented PFOA contamination. Details of the study enrolment process, including consenting procedures, have been described elsewhere <sup>25</sup>.

The C8 Health Project collected data on 69,030 people. ~~While it is not possible to estimate the~~ The participation rate for the C8 Health Project ~~as it is not possible to estimate the number of total possible participants over 50 years of environmental contamination, a participation rate,~~ based on US census counts of residents in the affected water districts during Project enrolment, have been estimated at around 80% <sup>25</sup>. In this population, the strongest predictor of PFOA serum concentration was residence in one of the contaminated water districts <sup>26</sup>; serum levels of other PFAAs do not show such geographic variation. Of the population, 21,724 older adults (aged  $\geq 50$  years) were considered for this analysis, and a total of 21,024 (96.8%) were included in the final analysis after exclusion of subjects with missing data on ethnicity, education level, socio-economic status, cigarette smoking, or BMI measurements.

#### Memory impairment definition

During the survey (2005-2006), all participants were asked if they “had experienced short term memory loss”, the possible answers being “frequently”, “sometimes”, “rarely”, and “never”. The principle analyses assessed m-Memory impairment ~~was~~ defined as reporting short-term memory loss frequently or sometimes, compared to rarely and never. Severe m-Memory impairment ever was also considered, defined as reporting any memory loss and compared to the never category. ~~frequent episodes of short term memory loss.~~

#### Laboratory analysis

Blood samples were obtained and processed at individual data collection sites. Samples were drawn into four tubes per participant, with a maximum 35 mL. Tubes were spun, aliquoted, and refrigerated until shipping. Samples were shipped on dry ice daily from each data collection site to the laboratory daily <sup>25</sup>. Participants were not asked to fast before blood sample withdrawal, but fasting status was recorded.

Laboratory analysis of PFAAs used an automated solid-phase extraction combined with reverse-phase high-performance liquid chromatography <sup>27</sup>. Analyses were conducted by the Exygen Research Inc., State College, PA, USA; an intra-laboratory quality assurance program was carried out by analysis of duplicate samples at AXYS Analytical Service Ltd., Sidney, BC, Canada <sup>25</sup>. The intra-laboratory coefficient of variation for ~~both PFOA and PFOS~~ all PFAAs measurements was 0.1; the inter-laboratory comparison coefficient of variation was 0.2 for PFOA and PFNA, and 0.1 for PFOS,



1  
2  
3 and not applicable for PFHxA as all in the second lab measurement values were below level of  
4 detection<sup>25</sup>. The detection limit for all PFAAs PFOA and PFOS was 0.5 ng/mL and observations below  
5 this limit were assigned a value of 0.25 ng/mL (~~n=3216, and n=230101, n=532, and n=387~~ for PFOA,  
6 ~~and PFOS, PFNA, and PFHxS~~, respectively, for this study population). All PFAAs Both PFOA and PFOS  
7 concentration distributions were skewed to the right. Methods and results are reported according to  
8 STROBE-ME recommendations<sup>28</sup>.  
9  
10  
11  
12

### 13 14 15 **Statistical analysis**

16 Associations between exposure (serum concentration of PFOA, PFOS, PFNA, and PFHxS) and memory  
17 impairment were studied using logistic regression. Minimally adjusted models included age, in one  
18 year age-band, race (white, black, and others), gender, and educational level (high school diploma or  
19 general educational development (GED), some college, bachelor degree or higher) (Model 1).  
20 Further adjusted models additionally included average household income ( $\leq$ \$10,000, \$10,001-  
21 20,000, \$20,001-30,000, \$30,001-40,000, \$40,001-50,000, \$50,001-60,000, \$60,001-70,000,  
22 >\$70,000), physical activity, alcohol consumption (none, <1 drink/month, <1 drink/week, few  
23 drinks/week, >1 drink/day) and cigarette smoking (never smoker, former smoker, current smoker  
24 <10 cigarettes/day, current smoker 10-19 cigarettes/day, current smoker  $\geq$ 20 cigarettes/day) (Model  
25 2). Fully adjusted models included also body mass index (BMI) (underweight/normal weight;  
26 overweight; and obese class I, II, and III), and diabetes (Model 3). PFAA concentrations were log-  
27 transformed to reduce skewness. For each model the association between PFAAs and self-reported  
28 memory impairment was calculated for a doubling in PFAA concentration in a model with PFAA  
29 entered as numerical-continuous covariate, and for quintile groups of the PFAA distribution, and by  
30 ordinal regression analysis with the outcome variable comprising the four original levels of self-  
31 reported frequency of episodes of memory loss, again in relation to a doubling of PFAAs. To explore  
32 possible differential effect of PFAA in sub-groups, analyses were further stratified by diabetes status  
33 and, among diabetics, by type of medications.  
34  
35  
36  
37  
38  
39  
40  
41  
42  
43  
44  
45

46 The following ffFour sensitivity analyses were carried out: firstly one analysis restricting the sample to  
47 7,097 subjects aged 65 years and older. Secondly, an analysis conducted on the entire sample, but  
48 using as outcome definition only those reporting any frequent episodes of memory loss (frequently,  
49 sometimes, and rarely). Third, an ordinal regression analysis with the outcome variable comprising  
50 the four original levels of self-reported frequency of episodes of memory loss. Fourth, we also  
51 considered the possibility that mobility (i.e. moving house measured as number of address during  
52 lifetime) might be associated with both memory loss and C8 and hence confound the association.  
53  
54  
55  
56  
57  
58  
59  
60

1  
2  
3 ~~Finally~~Our final sensitivity analysis utilises the geographical clustering of PFOA exposure by in-water  
4 districts which allowed use to decompose the overall estimate of association of PFOA with memory  
5 impairment into within and between water district components, by including as explanatory  
6 variables both water district mean logged PFOA serum concentration and ~~potential~~the deviations of  
7 individual's values from their district mean<sup>29</sup>. These two associations are subject to different  
8 ~~potential~~biases, so help interpretation.  
9  
10  
11  
12  
13

### 20 21 **Role of funding**

22  
23 Funding for this work, the "C8 Science Panel Community Study at London School of Hygiene and  
24 Tropical Medicine - LSHTM", comes from the C8 Class Action Settlement Agreement (Circuit Court of  
25 Wood County, WV, USA) between DuPont and plaintiffs, which resulted from releases of  
26 ~~perfluorooctanoate~~ (PFOA, (or C8) into drinking water. It is one of the C8 Science Panel Studies  
27 undertaken by the Court-approved C8 Science Panel established under the same Settlement  
28 Agreement. The task of the C8 Science Panel, of which Tony Fletcher is a member, is to undertake  
29 research in the Mid-Ohio Valley, and subsequently evaluate the results along with other available  
30 information to determine if there are any probable links between PFOA and disease. Funds were  
31 administered by the Garden City Group (Melville, NY) that reports to the Court. The authors of this  
32 manuscript declare that their ability to design, conduct, interpret, or publish research was  
33 unimpeded by and fully independent of the court and/or settling parties. In addition, they declare no  
34 competing financial interests. The LSHTM Ethics Committee approved this study.  
35  
36  
37  
38  
39  
40  
41  
42  
43  
44  
45  
46  
47

### 48 **RESULTS**

49  
50 A total of 4,462 subjects (21.2% of the entire population of 21,024 individuals aged 50 years or  
51 older) self-reported short-term memory impairment (~~Error! Reference source not found.~~  
52 ~~Error!~~  
53 ~~Reference source not found.~~Figure 1): episodes of short-term memory loss were reported  
54 frequently by 1,115 subjects (5.3%); sometimes by 3,347 (15.9%); rarely by 4,283 (20.4%) and never  
55 by 12,279 (58.4%). Many personal characteristics were associated individually with memory loss,  
56  
57  
58  
59  
60

1  
2  
3 including higher age, lower socio-economic status, smoking, and diagnosis of diabetes (Table 1),  
4 though to what extent these reflected independent risk factors was not investigated.

5  
6  
7 Results from the logistic regression of association between PFAAs and memory impairment are  
8 shown in Table 2. Results for minimally, further and fully adjusted models were similar, so we show  
9 only further adjusted results in this table, but results for all models are in the on-line Table 1. Inverse  
10 associations between PFOS and PFOA and memory impairment were highly statistically significant  
11 with adjusted OR=0.93 (0.90-0.96) for PFOS and OR=0.96 (0.94-0.98) for PFOA for doubling PFAA  
12 concentrations. Inverse associations of similar magnitude with PFNA and PFHxS but of borderline  
13 statistical significance were found: OR=0.96 (0.92-1.02) for PFNA and OR=0.97 (0.94-1.00) for PFHxS.  
14  
15 The analysis by PFAA quintile groups shows similar patterns.

16  
17  
18 Inverse associations of PFAAs with memory impairment were weaker or non-existent in diabetics  
19 than ~~overall in for~~ non-diabetics (Table 3), though odds ratios were imprecise, and the difference by  
20 diabetes status ~~so this pattern~~ was only significant for PFOA (p-value for interaction = 0.014).

21  
22  
23 Analysis further stratified by specific diabetes medication use showed no variation in odds ratios  
24 more than explicable by chance given the number of tests made (on-line Table 2).

25  
26  
27 In the sensitivity analysis on subjects older than 65 years, the substantial reduction of the sample  
28 size resulted in loss of precision in odds ratios. However, the points estimates of ~~there were~~  
29 associations with memory impairment were of comparable magnitude ~~in memory impairment with~~  
30 for all PFAAs except ~~for~~ PFOA for which the association with memory impairment was close to null  
31 ~~virtually disappears~~ (OR= 0.99 (0.97-1.03)) (Table 4).

32  
33  
34 The analysis carried out on the entire sample, ~~but comparing those with any memory impairment~~  
35 against those with no memory problems ~~restricting the definition of memory impairment to those~~  
36 who report frequent short term memory loss episodes shows slightly weaker associations for each  
37 PFAAs ~~substantially unaltered associations for PFOA and PFNA, and somewhat reduced inverse~~  
38 associations for PFOS and PFHxS, but precision was reduced (Table 4). Analyses using ordinal  
39 regression in place of binary logistic regression gave yielded similar results to the logistic regressions  
40 (Table 2, Table 3, and Table 4).

41  
42  
43 ~~Mobility as indicated by count of addresses was not appreciably associated with C8, so results~~  
44 ~~changed very little on inclusion this variable in our regression analysis and are not shown.~~

45  
46  
47 The analysis separating the PFOA-memory impairment association into within and between water  
48 district components found that within water districts there was an inverse association between  
49 PFOA individuals with high PFOA tended to have less and memory impairment, as in the overall

association (OR 0.94, 95%CI 0.91-0.98, scale and adjustments as before). However there was no association between geometric mean concentration by tendency for water districts with high PFOA on average to a lower proportion of persons with and memory loss-impairment (OR 1.00, 95%CI 0.97-1.03, per doubling in geometric mean PFOA by district).

Extra data is available upon request by emailing Valentina Gallo-Tony Fletcher (v.gallo@qmul.ac.uk tony.fletcher@lshtm.ac.uk).

## DISCUSSION

An inverse association between PFAAs serum levels (including PFOS, PFOA, PNA, and PFHxS) and self-reported memory impairment has been observed in this large population-based, cross-sectional study. This association is stronger more clearly monotonic with increasing exposure, and more statistically significant for PFOA and PFOS. However, the consistent decrement for all PFAAs suggests a common mechanism.

It is plausible that PFAAs could have an effect on cognitive function via PPAR agonism. Although it is not clear to what extent PFAAs act differentially on PPAR receptors  $\alpha$  and  $\gamma$ <sup>18</sup>, it could be speculated that this effect-association might be mediated by the activation of the PPAR receptor by PFAAs. Activation of the PPAR $\gamma$  receptors has been shown to decrease the secretion of proinflammatory cytokines and possibly increase phagocytosis of A $\beta$  inclusions, probably through activation of microglia<sup>30</sup>. However there was suggestion that this effect of suppression of the activation of microglia was age-dependent or disease stage-dependent being not significant in patients with advanced Alzheimer's disease (AD)<sup>31 32</sup>. PPAR agonist drugs, such as non-steroidal anti-inflammatory drugs (NSAID) and some anti-diabetics (i.e. thiazolidinedione or pioglitazone) have been proposed as preventive drugs for neurodegenerative conditions, including Alzheimer's dementia<sup>30 33</sup>.

In a previous published study an inverse association between PFAAs and memory impairment was observed specifically among non-medicated diabetics<sup>19</sup>. In the present study, this pattern was not replicated, with the inverse association between PFAAs and cognitive impairment was being more evident in those without than with diabetes; among diabetics, the association was not present, irrespective of treatment status. This finding could be at least partially due to explained by the fact that in diabetics PPAR receptors are more phosphorylated with a consequent reduced transcriptional activity<sup>34 35</sup>, and the balance between PPAR $\gamma$  expression and activity levels is altered<sup>34 36</sup>. It is therefore reasonable to assume possible – based on the present data – that the PPAR-

agonist effect of PFAAs is different in subjects with and without PPAR-mediated metabolic changes such as diabetes. Also, it has been reported that PFAAs have a PPAR agonist effect, more prominently PPAR- $\alpha$ <sup>37</sup>; animal models suggest that PFOA has a stronger agonistic effect than PFOS<sup>37</sup>. ~~Our findings of~~ ~~Taken all together these results are compatible with~~ an inverse association between PFAA and memory impairment among non-diabetics, ~~and would be~~ therefore be compatible with a possible anti-inflammatory role exerted by PFAA on early symptoms of cognitive impairment.

There is some evidence of detrimental effects of PFAAs in neurodevelopment of mice affecting the cholinergic system and cognitive function<sup>38-40</sup>, thus timing of exposure may also be relevant in order for the PFAAs to exert this hypothesised anti-dementing role.

~~That the association with PFOA was entirely within water districts, and not present at all between water districts despite large differences in (geometric) mean PFOA between districts (range 15.7–405.1) helps shed light on which biases the results are most vulnerable to. The between-district estimate is not vulnerable to reverse causation and related biases at individual level, making this a more plausible explanation of the results. This association is, however, subject to bias by “ecologic” confounding by unmeasured factors differing across districts. This suggests that either the association documented at individual level could be confounded (e.g. by a common genetic variant related to both dementia risk and some excretion pathways); or that the association at the district level is biased towards the null (e.g. by confounding by socio-economic status). The notion that the association estimates found for PFOA are in the same direction of those found for PFNA and PFHx<sub>3</sub>, and in the majority of cases very consistent with those found for PFOS, however, tend to reinforce the notion of an inverse association between PFOA (and other PFAAs) and memory impairment at individual level. This suggests a common biological mechanism behind the findings.~~

~~Another alternative explanation of these findings is that the association between PFAAs and memory impairment is confounded by drinking water as inversely related to drinking artificially sweetened soft drinks. Fructose, currently the most used sweetener used in drinks as well as in a wide range of packaged food, has been associated with higher risk of dementia<sup>40</sup>. Assuming that the consumption of water (contaminated by PFOA in this population case) is inversely related to the consumption of soft drinks, this would lead to an artificial association between PFOA and memory impairment. However, indirect evidences gathered mainly during intervention trials among adolescents suggest that soft drink consumption is independent from the amount of water consumed by individuals<sup>41-42</sup>. Also, if this was true one would expect that the pattern observed for PFOA to be substantially different from those observed for the other PFAAs, which is not in this case.~~

1  
2  
3 However, these findings should ~~also~~ be interpreted cautiously given the ~~several~~ limitations of the  
4 study. Firstly, given the cross-sectional nature of the study, reverse causality must be  
5 considered~~cannot be ruled out~~: subjects suffering from memory impairment could have ~~drunk~~  
6 consumed less of these compounds via water and food sources, though less water resulting in  
7 average lower levels of PFAA, although this is not a likely explanation given the consistency of the  
8 association across various PFAAs which have substantially different routes of exposure. Host  
9 characteristics such as genotype could be correlated with both some mechanism predisposing these  
10 symptoms and variation in PFAA excretion rates, thus leading to a confounded association with  
11 serum levels. ~~Further~~ Secondly, self-reported is not a very accurate method for ascertaining memory  
12 impairment, although errors in classification would be expected to be ~~are likely to result in~~ non-  
13 differential misclassification, biasing the estimate of association towards the null. ~~Thirdly, t~~  
14 The effects of PFAA have been mostly studied in relation to PPAR $\alpha$ <sup>7</sup>, while the receptor mostly  
15 implicated in metabolic changes and diabetes and in dementia PPAR $\gamma$ <sup>30</sup>; however, these two belong  
16 to the same receptor family and some degree of cross-activation cannot be excluded, and the  
17 knowledge of their pleiotropic effects is currently advancing<sup>41</sup>. Lastly, the classification into analysis  
18 of different anti-diabetic medications is uncertain as particularly hampered by the fact that these  
19 were self-reported and not prompted by interviewers. However, we consider it very unlikely that  
20 any misreporting would be confounded with serum PFAAs. This would tend to ~~has likely led to~~ low  
21 specificity and thus bias of the association (if any) towards the null.  
22  
23  
24  
25  
26  
27  
28  
29  
30  
31  
32  
33

34  
35 On the other hand, strengths of this study include the fact that all showed estimates were adjusted  
36 for numerous potential confounders, including age in one-year age bands, making the effect of PFAA  
37 on memory impairment not likely to be confounded by lifestyle characteristics. Furthermore, these  
38 results are based on a very large population representative of the general population in West  
39 Virginia and Ohio<sup>25</sup>, thus estimates are solid; and ~~Finally~~, the 21% prevalence of memory  
40 impairment is compatible and consistent with figures on prevalence of dementia reported for North  
41 America (Ferri et al, 2005).  
42  
43  
44  
45

46  
47 Individual serum levels reflect the contributions of both intake and retention/excretion rates. While  
48 we have no direct data on either of these components, the large differences in drinking water  
49 contamination and associated average population serum levels for PFOA in the 6 water districts,  
50 allow an estimate of the effect of exposure. That the association with PFOA was entirely within  
51 water districts, and not present at all between water districts despite large differences in (geometric)  
52 mean PFOA between districts (range 15.7 – 405.1) is suggestive of a bias operating at one or both of  
53 these levels. The between district estimate is not vulnerable to reverse causation or confounding at  
54  
55  
56  
57  
58  
59  
60

1  
2  
3 individual level, though some ecological confounding may operate if it happens to correlate with  
4 exposure level. Conversely the within district estimate but not between district estimate could  
5 reflect such individual confounding if present. Thus either the association documented at individual  
6 level could be confounded (e.g. by a common genetic variant related to both dementia risk and  
7 some excretion pathways); or that the association at the district level is biased towards the null (e.g.  
8 by confounding by socio-economic status). This sensitivity analysis cannot prove the presence of  
9 confounding at either level, but if the association had been consistent at both individual and district  
10 level that would have been more convincing of the association being due to PFAAs.

11 The size of the associations observed has both strong and weak aspects. The strong statistical  
12 significance suggests chance is an unlikely explanation. However, the odds ratios are only modestly  
13 different from one, 0.75 at the most extreme, so that biases are a more plausible explanation than  
14 they would be with more extreme ratios.

15  
16  
17  
18  
19  
20  
21  
22  
23  
24 In conclusion, these data show an inverse association between PFOA and PFOS exposure and self-  
25 reported memory-impairment, particularly in non diabetics. This can be potentially explained by  
26 preventive anti-inflammatory effect exerted by a PPAR agonist effect of these ~~perfluorochlorinated~~  
27 ~~compounds~~ PFAAs, but confounding or even reverse causation cannot be excluded as an alternative  
28 explanation.  
29  
30  
31  
32  
33  
34

### 35 **ACKNOWLEDGMENTS**

36  
37 We are grateful to Dr Marc Weiskopf for his thoughtful comments on the draft of this manuscript,  
38 and for constructive idea sharing and discussions on this topic.  
39

40  
41 **COMPETING INTERESTS:** The authors declare no competing financial interests  
42  
43  
44  
45  
46  
47  
48  
49  
50  
51  
52  
53  
54  
55  
56  
57  
58  
59  
60



## References

1. Kato K, Wong LY, Jia LT, Kuklennyk Z, Calafat AM. Trends in Exposure to Polyfluoroalkyl Chemicals in the U.S. Population: 1999-2008 (dagger). *Environ Sci Technol* 2011.
2. Tao L, Kannan K, Kajiwara N, Costa MM, Fillmann G, Takahashi S, et al. Perfluorooctanesulfonate and related fluorochemicals in albatrosses, elephant seals, penguins, and polar skuas from the Southern Ocean. *Environmental science & technology* 2006;40(24):7642-8.
3. Kim SK, Lee KT, Kang CS, Tao L, Kannan K, Kim KR, et al. Distribution of perfluorochemicals between sera and milk from the same mothers and implications for prenatal and postnatal exposures. *Environ Pollut* 2011;159(1):169-74.
4. Lau C, Anitole K, Hodes C, Lai D, Pfahles-Hutchens A, Seed J. Perfluoroalkyl acids: a review of monitoring and toxicological findings. *Toxicological sciences : an official journal of the Society of Toxicology* 2007;99(2):366-94.
5. D'Hollander W, de Voogt P, De Coen W, Bervoets L. Perfluorinated substances in human food and other sources of human exposure. *Reviews of environmental contamination and toxicology* 2010;208:179-215.
6. Goosey E, Harrad S. Perfluoroalkyl compounds in dust from Asian, Australian, European, and North American homes and UK cars, classrooms, and offices. *Environment international* 2011;37(1):86-92.
7. DeWitt JC, Shnyra A, Badr MZ, Loveless SE, Hoban D, Frame SR, et al. Immunotoxicity of perfluorooctanoic acid and perfluorooctane sulfonate and the role of peroxisome proliferator-activated receptor alpha. *Critical reviews in toxicology* 2009;39(1):76-94.
8. Peters JM, Gonzalez FJ. Why toxic equivalency factors are not suitable for perfluoroalkyl chemicals. *Chemical research in toxicology* 2011;24(10):1601-9.
9. Howroyd P, Swanson C, Dunn C, Cattley RC, Corton JC. Decreased longevity and enhancement of age-dependent lesions in mice lacking the nuclear receptor peroxisome proliferator-activated receptor alpha (PPARalpha). *Toxicologic pathology* 2004;32(5):591-9.
10. Capri M, Salvioli S, Sevini F, Valensin S, Celani L, Monti D, et al. The genetics of human longevity. *Annals of the New York Academy of Sciences* 2006;1067:252-63.
11. Paolisso G, Barbieri M, Rizzo MR, Carella C, Rotondi M, Bonafe M, et al. Low insulin resistance and preserved beta-cell function contribute to human longevity but are not associated with TH-INS genes. *Experimental gerontology* 2001;37(1):149-56.
12. Heneka MT, Feinstein DL, Galea E, Gleichmann M, Wullner U, Klockgether T. Peroxisome proliferator-activated receptor gamma agonists protect cerebellar granule cells from cytokine-induced apoptotic cell death by inhibition of inducible nitric oxide synthase. *Journal of neuroimmunology* 1999;100(1-2):156-68.
13. Heneka MT, Klockgether T, Feinstein DL. Peroxisome proliferator-activated receptor-gamma ligands reduce neuronal inducible nitric oxide synthase expression and cell death in vivo. *The Journal of neuroscience : the official journal of the Society for Neuroscience* 2000;20(18):6862-7.
14. Combs CK, Johnson DE, Karlo JC, Cannady SB, Landreth GE. Inflammatory mechanisms in Alzheimer's disease: inhibition of beta-amyloid-stimulated proinflammatory responses and neurotoxicity by PPARgamma agonists. *The Journal of neuroscience : the official journal of the Society for Neuroscience* 2000;20(2):558-67.
15. Kim EJ, Kwon KJ, Park JY, Lee SH, Moon CH, Baik EJ. Effects of peroxisome proliferator-activated receptor agonists on LPS-induced neuronal death in mixed cortical neurons: associated with iNOS and COX-2. *Brain research* 2002;941(1-2):1-10.
16. Luna-Medina R, Cortes-Canteli M, Alonso M, Santos A, Martinez A, Perez-Castillo A. Regulation of inflammatory response in neural cells in vitro by thiazolidinones derivatives through peroxisome proliferator-activated receptor gamma activation. *The Journal of biological chemistry* 2005;280(22):21453-62.



17. Whitehead JP. Diabetes: New conductors for the peroxisome proliferator-activated receptor gamma (PPARgamma) orchestra. *The international journal of biochemistry & cell biology* 2011;43(8):1071-4.
18. Takacs ML, Abbott BD. Activation of mouse and human peroxisome proliferator-activated receptors (alpha, beta/delta, gamma) by perfluorooctanoic acid and perfluorooctane sulfonate. *Toxicological sciences : an official journal of the Society of Toxicology* 2007;95(1):108-17.
19. Power MC, Webster TF, Baccarelli AA, Weisskopf MG. Cross-Sectional Association between Polyfluoroalkyl Chemicals and Cognitive Limitation in the National Health and Nutrition Examination Survey. *Neuroepidemiology* 2012;40(2):125-32.
20. McCrimmon RJ, Ryan CM, Frier BM. Diabetes and cognitive dysfunction. *Lancet* 2012;379(9833):2291-9.
21. MacNeil J, Steenland NK, Shankar A, Ducatman A. A cross-sectional analysis of type II diabetes in a community with exposure to perfluorooctanoic acid (PFOA). *Environmental research* 2009;109(8):997-1003.
22. Steenland K, Fletcher T, Savitz DA. Epidemiologic evidence on the health effects of perfluorooctanoic acid (PFOA). *Environmental health perspectives* 2010;118(8):1100-8.
23. Lin CY, Chen PC, Lin YC, Lin LY. Association among serum perfluoroalkyl chemicals, glucose homeostasis, and metabolic syndrome in adolescents and adults. *Diabetes care* 2009;32(4):702-7.
24. Lundin JI, Alexander BH, Olsen GW, Church TR. Ammonium perfluorooctanoate production and occupational mortality. *Epidemiology* 2009;20(6):921-8.
25. Frisbee SJ, Brooks AP, Jr., Maher A, Flensburg P, Arnold S, Fletcher T, et al. The C8 health project: design, methods, and participants. *Environmental health perspectives* 2009;117(12):1873-82.
26. Steenland K, Jin C, MacNeil J, Lally C, Ducatman AM, Vieira V, et al. Predictors of PFOA levels in community surrounding a chemical plant. *Environ Health Perspect* 2009;in press.
27. Kuklenyik Z, Reich JA, Tully JS, Needham LL, Calafat AM. Automated solid-phase extraction and measurement of perfluorinated organic acids and amides in human serum and milk. *Environmental science & technology* 2004;38(13):3698-704.
28. Gallo V, Egger M, McCormack V, Farmer PB, Ioannidis JP, Kirsch-Volders M, et al. Strengthening the Reporting of Observational studies in Epidemiology - Molecular Epidemiology (STROBE-ME): An Extension of the STROBE Statement. *PLoS Med* 2011;8(10):e1001117.
29. Gallo V, Leonardi G, Genser B, Lopez-Espinosa MJ, Frisbee SJ, Karlsson L, et al. Serum Perfluorooctanoate (PFOA) and Perfluorooctane Sulfonate (PFOS) Concentrations and Liver Function Biomarkers in a Population with Elevated PFOA Exposure. *Environ Health Perspect* 2012.
30. Lleo A, Galea E, Sastre M. Molecular targets of non-steroidal anti-inflammatory drugs in neurodegenerative diseases. *Cellular and molecular life sciences : CMLS* 2007;64(11):1403-18.
31. Alafuzoff I, Overmyer M, Helisalmi S, Soininen H. Lower Counts of Astroglia and Activated Microglia in Patients with Alzheimer's Disease with Regular Use of Non-Steroidal Anti-Inflammatory Drugs. *Journal of Alzheimer's disease : JAD* 2000;2(1):37-46.
32. Jimenez S, Baglietto-Vargas D, Caballero C, Moreno-Gonzalez I, Torres M, Sanchez-Varo R, et al. Inflammatory response in the hippocampus of PS1M146L/APP751SL mouse model of Alzheimer's disease: age-dependent switch in the microglial phenotype from alternative to classic. *The Journal of neuroscience : the official journal of the Society for Neuroscience* 2008;28(45):11650-61.
33. Revill P, Moral MA, Prous JR. Impaired insulin signaling and the pathogenesis of Alzheimer's disease. *Drugs Today (Barc)* 2006;42(12):785-90.
34. Anbalagan M, Huderson B, Murphy L, Rowan BG. Post-translational modifications of nuclear receptors and human disease. *Nucl Recept Signal* 2012;10:e001.

- 1  
2  
3 35. Choi JH, Banks AS, Estall JL, Kajimura S, Bostrom P, Laznik D, et al. Anti-diabetic drugs inhibit  
4 obesity-linked phosphorylation of PPARgamma by Cdk5. *Nature* 2010;466(7305):451-6.  
5 36. Hauser S, Adelmant G, Sarraf P, Wright HM, Mueller E, Spiegelman BM. Degradation of the  
6 peroxisome proliferator-activated receptor gamma is linked to ligand-dependent activation.  
7 *The Journal of biological chemistry* 2000;275(24):18527-33.  
8 37. Wolf CJ, Takacs ML, Schmid JE, Lau C, Abbott BD. Activation of mouse and human peroxisome  
9 proliferator-activated receptor alpha by perfluoroalkyl acids of different functional groups  
10 and chain lengths. *Toxicological sciences : an official journal of the Society of Toxicology*  
11 2008;106(1):162-71.  
12 38. Johansson N, Eriksson P, Viberg H. Neonatal exposure to PFOS and PFOA in mice results in  
13 changes in proteins which are important for neuronal growth and synaptogenesis in the  
14 developing brain. *Toxicological sciences : an official journal of the Society of Toxicology*  
15 2009;108(2):412-8.  
16 39. Johansson N, Fredriksson A, Eriksson P. Neonatal exposure to perfluorooctane sulfonate (PFOS)  
17 and perfluorooctanoic acid (PFOA) causes neurobehavioural defects in adult mice.  
18 *Neurotoxicology* 2008;29(1):160-9.  
19 40. Viberg H, Lee I, Eriksson P. Adult dose-dependent behavioral and cognitive disturbances after a  
20 single neonatal PFHxS dose. *Toxicology* 2013;304:185-91.  
21 41. Staels B, Fruchart JC. Therapeutic roles of peroxisome proliferator-activated receptor agonists.  
22 *Diabetes* 2005;54(8):2460-70.  
23  
24  
25  
26  
27  
28  
29  
30  
31  
32  
33  
34  
35  
36  
37  
38  
39  
40  
41  
42  
43  
44  
45  
46  
47  
48  
49  
50  
51  
52  
53  
54  
55  
56  
57  
58  
59  
60

Table 1: Participant Characteristics, Mid-Ohio Valley, 2005-2006 (N=21,024)

|                                     | All<br>N=21,024* | Memory impaired<br>N=4,462^ |
|-------------------------------------|------------------|-----------------------------|
| <b>Males, n (%)</b>                 | 10,353 (49.2)    | 2,040 (19.7)                |
| <b>Females, n (%)</b>               | 10,671 (50.8)    | 2,422 (22.7)                |
| <b>Age, median/mean (SD)</b>        | 60.5/62.3 (9.0)  | 59.9/62.3 (9.4)             |
| <b>Age groups</b>                   |                  |                             |
| 50-54 years                         | 5,381 (25.6)     | 1,185 (22.0)                |
| 55-59 years                         | 4,831 (23.0)     | 1,055 (21.8)                |
| 60-64 years                         | 3,715 (17.7)     | 740 (19.9)                  |
| 65-69 years                         | 2,930 (13.9)     | 535 (18.3)                  |
| 70-74 years                         | 1,979 (9.4)      | 419 (21.2)                  |
| 75-79 years                         | 1,251 (6.0)      | 269 (21.5)                  |
| 80+ years                           | 937 (4.5)        | 259 (27.6)                  |
| <b>Regular exercise, n (%)</b>      | 6,774 (32.2)     | 1,306 (19.3)                |
| <b>BMI, n (%)</b>                   |                  |                             |
| Normal weight                       | 5,100 (24.3)     | 1,051 (20.6)                |
| Overweight                          | 8,194 (39.0)     | 1,612 (19.7)                |
| Obese class I                       | 4,789 (22.8)     | 1,028 (21.5)                |
| Obese class II                      | 1,805 (8.6)      | 457 (25.3)                  |
| Obese class III                     | 1,136 (5.4)      | 314 (27.6)                  |
| <b>Household income, \$/y n (%)</b> |                  |                             |
| ≤10,000                             | 1,486 (7.1)      | 448 (30.2)                  |
| 10,001-20,000                       | 3,059 (14.6)     | 757 (24.8)                  |
| 20,001-30,000                       | 3,281 (15.6)     | 751 (22.9)                  |
| 30,001-40,000                       | 2,936 (14.0)     | 572 (19.5)                  |
| 40,001-50,000                       | 2,135 (10.2)     | 422 (19.8)                  |
| 50,001-60,000                       | 1,815 (8.6)      | 359 (19.8)                  |
| 60,001-70,000                       | 1,367 (6.5)      | 268 (19.6)                  |
| >70,000                             | 2,882 (13.7)     | 480 (16.7)                  |
| Undetermined                        | 2,063 (9.8)      | 405 (19.6)                  |
| <b>Education, n (%)</b>             |                  |                             |
| < 12 years                          | 3,310 (15.7)     | 845 (25.5)                  |
| HS diploma or GED                   | 9,704 (46.2)     | 1,979 (20.4)                |
| Some college                        | 5,612 (26.7)     | 1,204 (21.5)                |
| Bachelor degree or higher           | 2,398 (11.4)     | 434 (18.1)                  |
| <b>Race, n (%)</b>                  |                  |                             |
| White                               | 20,514 (97.6)    | 4,349 (21.2)                |
| Black                               | 213 (1.0)        | 38 (17.8)                   |
| Other                               | 297 (1.4)        | 75 (25.3)                   |
| <b>Alcohol consumption, n (%)</b>   |                  |                             |
| None                                | 13,276 (63.2)    | 2,848 (21.5)                |
| < 1 drink/month                     | 2,589 (12.3)     | 597 (23.1)                  |
| < 1 drink/week                      | 1,530 (7.3)      | 309 (20.2)                  |
| Few drinks/week                     | 2,087 (9.9)      | 397 (19.0)                  |
| 1-3 drinks/day                      | 805 (3.8)        | 142 (17.6)                  |
| >3 drinks/day                       | 310 (1.5)        | 66 (21.3)                   |
| Undetermined                        | 427 (2.0)        | 103 (24.1)                  |
| <b>Smoking status, n (%)</b>        |                  |                             |
| Never smoker                        | 9,804 (46.6)     | 1,906 (19.4)                |
| Former smoker                       | 7,555 (35.8)     | 1,693 (22.5)                |
| Current smoker < 10 cig/day         | 1,212 (5.8)      | 256 (21.1)                  |
| Current smoker 10-19 cig/day        | 1,260 (6.0)      | 310 (24.6)                  |
| Current smoker 20+ cig/day          | 1,213 (5.8)      | 297 (24.5)                  |
| <b>Diabetes, n (%)</b>              |                  |                             |
| Thiazolidinedion use~               | 809 (23.5)       | 202 (25.0)                  |
| Other medications~                  | 1,244 (36.1)     | 321 (25.8)                  |
| No medication~                      | 1,390 (40.4)     | 352 (25.3)                  |

\*percentages refer to the proportion with respect to the entire population; ^percentages reflect the proportion of memory impaired in each category; percentages among diabetics only

Table 2: The association between PFAAs and self-report memory impairment in logistic regression for a doubling PFAA concentration, by quintiles of PFAAs, and in ordinal regression (n=21,024)

|                           | Range<br>(ng/mL) | Adjusted OR and 95% C.I.* |
|---------------------------|------------------|---------------------------|
| <b>PFOS</b>               |                  | 0.93 (0.90-0.96)          |
| 1 <sup>st</sup> quintile  | 0.25-14.4        | Ref.                      |
| 2 <sup>nd</sup> quintile  | 14.5-20.4        | 0.96 (0.87-1.07)          |
| 3 <sup>rd</sup> quintile  | 20.5-27.1        | 0.86 (0.78-0.96)          |
| 4 <sup>th</sup> quintile  | 27.2-37.2        | 0.87 (0.78-0.96)          |
| 5 <sup>th</sup> quintile  | 37.3-759.2       | 0.85 (0.76-0.94)          |
| <b>Trend</b>              |                  | <0.001                    |
| <b>Ordinal regression</b> |                  | 0.95 (0.93-0.98)          |
| <b>PFOA</b>               |                  | 0.96 (0.94-0.98)          |
| 1 <sup>st</sup> quintile  | 0.25-14.0        | Ref.                      |
| 2 <sup>nd</sup> quintile  | 14.1-27.0        | 0.88 (0.79-0.97)          |
| 3 <sup>rd</sup> quintile  | 27.1-53.8        | 0.83 (0.75-0.92)          |
| 4 <sup>th</sup> quintile  | 53.9-118.1       | 0.79 (0.71-0.88)          |
| 5 <sup>th</sup> quintile  | 118.3-22,412     | 0.79 (0.71-0.88)          |
| <b>Trend</b>              |                  | <0.001                    |
| <b>Ordinal regression</b> |                  | 0.97 (0.96-0.98)          |
| <b>PFNA</b>               |                  | 0.96 (0.91-1.00)          |
| 1 <sup>st</sup> quintile  | 0.25-0.90        | Ref.                      |
| 2 <sup>nd</sup> quintile  | 1.0-1.2          | 0.86 (0.78-0.96)          |
| 3 <sup>rd</sup> quintile  | 1.3-1.4          | 0.87 (0.77-0.98)          |
| 4 <sup>th</sup> quintile  | 1.5-1.9          | 0.86 (0.77-0.95)          |
| 5 <sup>th</sup> quintile  | 2.0-28.6         | 0.89 (0.80-0.99)          |
| <b>Trend</b>              |                  | 0.053                     |
| <b>Ordinal regression</b> |                  | 0.97 (0.94-1.01)          |
| <b>PFHxS</b>              |                  | 0.96 (0.93-0.99)          |
| 1 <sup>st</sup> quintile  | 0.25-1.7         | Ref.                      |
| 2 <sup>nd</sup> quintile  | 1.8-2.6          | 1.01 (0.91-1.12)          |
| 3 <sup>rd</sup> quintile  | 2.7-3.6          | 1.02 (0.91-1.13)          |
| 4 <sup>th</sup> quintile  | 3.7-5.6          | 0.93 (0.84-1.04)          |
| 5 <sup>th</sup> quintile  | 5.7-232.6        | 0.89(0.79-0.99)           |
| <b>Trend</b>              |                  | 0.009                     |
| <b>Ordinal regression</b> |                  | 0.97 (0.94-0.99)          |

\*Model adjusted for age (one-year age bands), ethnicity, gender, and school level (categorical), household income (categorical), physical activity, alcohol consumption (categorical, none/<1drink/month, < 1 drink/week, few drinks/week, 1-3 drinks/day, >3 drinks/day, undetermined), and cigarette smoking (categorical, never, former, < 10 cig/day, 12-20 cig/day, 20+ cig/day)

Table 3: The association between PFAAs and self-report memory impairment in logistic regression for a doubling PFAA concentration, by quintiles of distribution, and in ordinal regression by diabetes status (validated by clinical records)

|                                | Range (ng/mL)   | OR (95% CI)*       | p for inter | N               | OR (95% CI)*       | p for inter |
|--------------------------------|-----------------|--------------------|-------------|-----------------|--------------------|-------------|
|                                | <b>PFOS</b>     |                    |             | <b>PFOA</b>     |                    |             |
|                                | <b>N=17,832</b> |                    |             | <b>N=17,832</b> |                    |             |
| <b>Non-diabetics</b>           |                 | 0.93 (0.90-0.96)†  | -           |                 | 0.95 (0.93-0.97) † | -           |
| <b>Ordinal regression</b>      |                 | 0.96 (0.93-0.99)   |             |                 | 0.96 (0.95-0.98)   |             |
| <b>1<sup>st</sup> quintile</b> | 0.25-14.5       | Ref.               |             | 0.25-14.3       | Ref.               |             |
| <b>2<sup>nd</sup> quintile</b> | 14.6-20.5       | 0.96 (0.86-1.08)   |             | 14.4-27.2       | 0.85 (0.76-0.95)   |             |
| <b>3<sup>rd</sup> quintile</b> | 20.6-27.0       | 0.90 (0.80-1.01)   |             | 27.3-54.3       | 0.82 (0.73-0.92)   |             |
| <b>4<sup>th</sup> quintile</b> | 27.1-37.1       | 0.88 (0.78-0.99)   |             | 54.4-119.1      | 0.76 (0.68-0.86)   |             |
| <b>5<sup>th</sup> quintile</b> | 37.2-759.2      | 0.85 (0.76-0.96)   |             | 119.2-8,416     | 0.75 (0.67-0.84)   |             |
| <b>Trend</b>                   |                 | 0.002              |             |                 | <0.001             |             |
|                                | <b>N=3,192</b>  |                    |             | <b>N=3,192</b>  |                    |             |
| <b>Diabetics</b>               |                 | 0.94 (0.88-1.02) † | 0.698       |                 | 1.02 (0.97-1.06) † | 0.014       |
| <b>Ordinal regression</b>      |                 | 0.95 (0.90-1.01)   |             |                 | 1.00 (0.97-1.04)   |             |
| <b>1<sup>st</sup> quintile</b> | 0.25-13.6       | Ref.               |             | 0.25-12.6       | Ref.               |             |
| <b>2<sup>nd</sup> quintile</b> | 13.7-20.0       | 1.06 (0.82-1.36)   |             | 12.7-25.4       | 1.04 (0.80-1.34)   |             |
| <b>3<sup>rd</sup> quintile</b> | 20.1-27.3       | 0.82 (0.63-1.06)   |             | 25.5-48.0       | 0.88 (0.67-1.14)   |             |
| <b>4<sup>th</sup> quintile</b> | 27.4-37.3       | 0.87 (0.67-1.13)   |             | 48.1-102.1      | 1.04 (0.80-1.35)   |             |
| <b>5<sup>th</sup> quintile</b> | 37.4-272.0      | 0.90 (0.69-1.17)   |             | 102.4-22,412    | 1.09 (0.84-1.42)   |             |
| <b>Trend</b>                   |                 | 0.162              |             |                 | 0.543              |             |
|                                | <b>PFNA</b>     |                    |             | <b>PFHxS</b>    |                    |             |
|                                | <b>N=17,832</b> |                    |             | <b>N=17,832</b> |                    |             |
| <b>Non-diabetics</b>           |                 | 0.95 (0.90-0.99) † | -           |                 | 0.96 (0.93-0.99) † | -           |
| <b>Ordinal regression</b>      |                 | 0.97 (0.93-1.01)   |             |                 | 0.97 (0.94-0.99)   |             |
| <b>1<sup>st</sup> quintile</b> | 0.25-0.9        | Ref.               |             | 0.25-1.8        | Ref.               |             |
| <b>2<sup>nd</sup> quintile</b> | 1.0-1.2         | 0.86 (0.77-0.97)   |             | 1.9-2.6         | 0.98 (0.87-1.10)   |             |
| <b>3<sup>rd</sup> quintile</b> | 1.3-1.5         | 0.85 (0.76-0.95)   |             | 2.7-3.7         | 0.99 (0.89-1.11)   |             |
| <b>4<sup>th</sup> quintile</b> | 1.6-1.9         | 0.83 (0.73-0.93)   |             | 3.8-5.7         | 0.93 (0.82-1.05)   |             |
| <b>5<sup>th</sup> quintile</b> | 2.0-28.6        | 0.88 (0.78-0.99)   |             | 5.8-232.6       | 0.88 (0.79-0.99)   |             |
| <b>Trend</b>                   |                 | 0.031              |             |                 | 0.029              |             |
|                                | <b>N=3,192</b>  |                    |             | <b>N=3,192</b>  |                    |             |
| <b>Diabetics</b>               |                 | 1.01 (0.90-1.13) † | 0.259       | 3,192           | 0.99 (0.92-1.06) † | 0.683       |
| <b>Ordinal regression</b>      |                 | 0.99 (0.91-1.09)   |             |                 |                    |             |
| <b>1<sup>st</sup> quintile</b> | 0.25-0.8        | Ref.               |             | 0.25-1.6        | Ref.               |             |
| <b>2<sup>nd</sup> quintile</b> | 0.9-1.1         | 1.06 (0.80-1.40)   |             | 1.7-2.3         | 1.06 (0.81-1.38)   |             |
| <b>3<sup>rd</sup> quintile</b> | 1.2-1.4         | 0.88 (0.66-1.17)   |             | 2.4-3.2         | 1.10 (0.85-1.42)   |             |
| <b>4<sup>th</sup> quintile</b> | 1.5-1.8         | 1.03 (0.77-1.36)   |             | 3.3-5.0         | 1.02 (0.79-1.33)   |             |
| <b>5<sup>th</sup> quintile</b> | 1.9-14.5        | 1.08(0.82-1.43)    |             | 5.1-99.7        | 1.00 (0.77-1.31)   |             |
| <b>Trend</b>                   |                 | 0.620              |             |                 | 0.942              |             |

\*using clinical record validated diagnosis of diabetes and self-reported use of medications, adjusted for age (one-year age bands), ethnicity, gender, school level (categorical), household income (categorical), physical activity, alcohol consumption (categorical, none/<1drink/month, < 1 drink/week, few drinks/week, 1-3 drinks/day, >3 drinks/day, undetermined), and cigarette smoking (categorical, never, former, < 10 cig/day, 12-20 cig/day, 20+ cig/day); † OR for doubling PFAA concentration

Table 4: Sensitivity analysis of the association between PFAAs and self-report memory impairment for a doubling PFAA concentration, by quintiles of PFAAs, and in ordinal regression on subjects aged 65 years and older (n=7,097), and using **severe-any** memory impairment as outcome measure (n=21,024).

|                           | Range (ng/mL) | OR (95% C.I.) <sup>b</sup><br>N=7,097<br>Restricted to those<br>aged 65+* | Range (ng/mL) | OR (95% C.I.) <sup>b</sup><br>N=21,024<br><b>Severely-memory<br/>impairedAny<br/>memory<br/>impairment<sup>^</sup></b> |
|---------------------------|---------------|---------------------------------------------------------------------------|---------------|------------------------------------------------------------------------------------------------------------------------|
| <b>PFOS</b>               |               | 0.95 (0.90-1.00)                                                          |               | 0.96 (0. <del>9094</del> -<br><del>1.020.99</del> )                                                                    |
| <b>Ordinal regression</b> |               | 0.98 (0.94-1.03)                                                          |               |                                                                                                                        |
| 1 <sup>st</sup> quintile  | 0.25-15.3     | Ref.                                                                      | 0.25-14.4     | Ref.                                                                                                                   |
| 2 <sup>nd</sup> quintile  | 15.4-22.0     | 0.99 (0.83-1.20)                                                          | 14.5-20.4     | <del>1.13</del> 0.96 (0. <del>9488</del> -<br><del>1.3505</del> )                                                      |
| 3 <sup>rd</sup> quintile  | 22.1-28.9     | 0.95 (0.79-1.14)                                                          | 20.5-27.1     | 0. <del>92</del> 90 (0. <del>7682</del> -<br><del>1.110.98</del> )                                                     |
| 4 <sup>th</sup> quintile  | 29.0-4.0      | 0.97 (0.81-1.16)                                                          | 27.2-37.2     | 0. <del>92</del> 94 (0. <del>7586</del> -<br><del>1.1203</del> )                                                       |
| 5 <sup>th</sup> quintile  | 40.1-759.2    | 0.84 (0.70-1.01)                                                          | 37.3-759.2    | 0. <del>92</del> 93 (0. <del>7585</del> -<br><del>1.1202</del> )                                                       |
| <b>Trend</b>              |               | 0.079                                                                     |               | 0. <del>094</del> 121                                                                                                  |
| <b>PFOA</b>               |               | 0.99 (0.97-1.03)                                                          |               | 0.975 (0.926-0.989)                                                                                                    |
| <b>Ordinal regression</b> |               | 1.00 (0.97-1.03)                                                          |               |                                                                                                                        |
| 1 <sup>st</sup> quintile  | 0.25-15.0     | Ref.                                                                      | 0.25-14.0     | Ref.                                                                                                                   |
| 2 <sup>nd</sup> quintile  | 15.1-29.6     | 0.91 (0.75-1.09)                                                          | 14.1-27.0     | 0. <del>84</del> 90 (0. <del>7082</del> -<br><del>1.010.98</del> )                                                     |
| 3 <sup>rd</sup> quintile  | 29.7-56.8     | 0.90 (0.75-1.08)                                                          | 27.1-53.8     | 0. <del>8586</del> (0. <del>7179</del> -<br><del>1.020.94</del> )                                                      |
| 4 <sup>th</sup> quintile  | 56.9-123.0    | 0.84 (0.70-1.01)                                                          | 53.9-118.1    | 0. <del>79</del> 87 (0. <del>6679</del> -<br><del>0.9695</del> )                                                       |
| 5 <sup>th</sup> quintile  | 123.1-5,994.8 | 0.99(0.83-1.19)                                                           | 118.3-22,412  | 0. <del>75</del> 85 (0. <del>6178</del> -<br><del>0.9193</del> )                                                       |
| <b>Tend</b>               |               | 0.680                                                                     |               | 0. <del>003</del> <0.001                                                                                               |
| <b>PFNA</b>               |               | 0.95 (0.87-1.02)                                                          |               | 0.982 (0. <del>8595</del> -<br><del>1.0002</del> )                                                                     |
| <b>Ordinal regression</b> |               | 0.99 (0.93-1.07)                                                          |               |                                                                                                                        |
| 1 <sup>st</sup> quintile  | 0.25-0.8      | Ref.                                                                      | 0.25-0.90     | Ref.                                                                                                                   |
| 2 <sup>nd</sup> quintile  | 0.9-1.1       | 0.88 (0.73-1.06)                                                          | 1.0-1.2       | 0.89 (0. <del>7482</del> -<br><del>1.070.97</del> )                                                                    |
| 3 <sup>rd</sup> quintile  | 1.2-1.4       | 0.81 (0.67-0.98)                                                          | 1.3-1.4       | 0. <del>82</del> 94 (0. <del>6685</del> -<br><del>1.0104</del> )                                                       |
| 4 <sup>th</sup> quintile  | 1.5-1.8       | 0.82 (0.68-0.99)                                                          | 1.5-1.9       | 0. <del>85</del> 92 (0. <del>7185</del> -<br><del>1.0201</del> )                                                       |
| 5 <sup>th</sup> quintile  | 1.9-11.7      | 0.88 (0.73-1.07)                                                          | 2.0-28.6      | 0. <del>79</del> 94 (0. <del>6586</del> -<br><del>0.971.03</del> )                                                     |
| <b>Trend</b>              |               | 0.177                                                                     |               | 0. <del>023</del> 493                                                                                                  |
| <b>PFHxS</b>              |               | 0.96 (0.91-1.01)                                                          |               | 0.978 (0.943-<br><del>1.040.99</del> )                                                                                 |
| <b>Ordinal regression</b> |               | 0.98 (0.93-1.02)                                                          |               |                                                                                                                        |
| 1 <sup>st</sup> quintile  | 0.25-1.9      | Ref.                                                                      | 0.25-1.7      | Ref.                                                                                                                   |
| 2 <sup>nd</sup> quintile  | 2.0-2.8       | 0.98 (0.82-1.18)                                                          | 1.8-2.6       | <del>1.100.98</del> (0. <del>9190</del> -<br><del>1.3307</del> )                                                       |
| 3 <sup>rd</sup> quintile  | 2.9-3.9       | 0.95 (0.79-1.15)                                                          | 2.7-3.6       | 1. <del>04</del> 03 (0. <del>8694</del> -                                                                              |

|                          |           |                  |           |                           |
|--------------------------|-----------|------------------|-----------|---------------------------|
|                          |           |                  |           | 1.2713)                   |
| 4 <sup>th</sup> quintile | 4.0-6.0   | 0.98 (0.82-1.17) | 3.7-5.6   | 0.91-96 (0.7587-1.1204)   |
| 5 <sup>th</sup> quintile | 6.1-232.6 | 0.86 (0.71-1.03) | 5.7-232.6 | 0.98-89 (0.8081-1.190.97) |
| <b>Trend</b>             |           | 0.139            |           | 0.2830.010                |

<sup>b</sup>Model 2 includes age (one-year age bands), ethnicity, gender, and school level (categorical), household income (categorical), physical activity, alcohol consumption (categorical, none/<1drink/month, < 1 drink/week, few drinks/week, 1-3 drinks/day, >3 drinks/day, undetermined), and cigarette smoking (categorical, never, former, < 10 cig/day, 12-20 cig/day, 20+ cig/day)

\* Sensitivity analysis including subjects aged 65 years or older only (N=7,097)

<sup>^</sup> Sensitivity analysis using a more restrictive definition of memory impairment (those reporting frequent episode of short-term memory loss only, cases = 1,115)

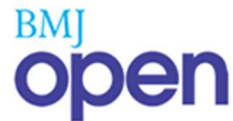

**Serum perfluoroalkyl acids concentrations and memory impairment in a large cross-sectional study**

|                                 |                                                                                                                                                                                                                                                                                                                                                                                                                                                                                  |
|---------------------------------|----------------------------------------------------------------------------------------------------------------------------------------------------------------------------------------------------------------------------------------------------------------------------------------------------------------------------------------------------------------------------------------------------------------------------------------------------------------------------------|
| Journal:                        | <i>BMJ Open</i>                                                                                                                                                                                                                                                                                                                                                                                                                                                                  |
| Manuscript ID:                  | bmjopen-2012-002414.R2                                                                                                                                                                                                                                                                                                                                                                                                                                                           |
| Article Type:                   | Research                                                                                                                                                                                                                                                                                                                                                                                                                                                                         |
| Date Submitted by the Author:   | 30-Apr-2013                                                                                                                                                                                                                                                                                                                                                                                                                                                                      |
| Complete List of Authors:       | Gallo, Valentina; Queen Mary, University of London, Centre for Primary Care and Public Health<br>Leonardi, Giovanni; London School of Hygiene and Tropical Medicine, Social and Environmental Health Research<br>Brayne, Carol; University of Cambridge,<br>Armstrong, Ben; London School of Hygiene and Tropical Medicine, Social and Environmental Health Research<br>Fletcher, Tony; London School of Hygiene and Tropical Medicine, Social and Environmental Health Research |
| <b>Primary Subject Heading</b>: | Epidemiology                                                                                                                                                                                                                                                                                                                                                                                                                                                                     |
| Secondary Subject Heading:      | Neurology                                                                                                                                                                                                                                                                                                                                                                                                                                                                        |
| Keywords:                       | Toxicology < PATHOLOGY, Epidemiology < TROPICAL MEDICINE, Dementia < NEUROLOGY                                                                                                                                                                                                                                                                                                                                                                                                   |
|                                 |                                                                                                                                                                                                                                                                                                                                                                                                                                                                                  |

SCHOLARONE™  
Manuscripts

Only



1  
2  
3 **Serum perfluoroalkyl acids concentrations and memory impairment in a large cross-sectional**  
4 **study**  
5

6 Valentina Gallo<sup>1,2</sup>, Giovanni Leonardi<sup>1</sup>, Carol Brayne<sup>3</sup>, Ben Armstrong<sup>1</sup>, Tony Fletcher<sup>1</sup>  
7  
8  
9

- 10  
11  
12  
13 1. Social and Environmental Health Research, London School of Hygiene and Tropical Medicine, London  
14 (UK)  
15 2. Centre for Primary Care and Public Health, Blizard Institute, Queen Mary, University of London,  
16 London (UK)  
17 3. University of Cambridge, Cambridge (UK)  
18  
19  
20  
21  
22

23 **Please send the correspondence to:**  
24

25 Dr Valentina Gallo, MD, MSc, PhD  
26 London School of Hygiene and Tropical Medicine  
27 Faculty of Public Health and Policy  
28 15-17 Tavistock place  
29 WC1H 9SH London  
30 Tel +44/(0)20/7927 2779  
31 Email: valentina.gallo@lshtm.ac.uk  
32  
33  
34  
35  
36  
37  
38  
39  
40

41 **Key words:** memory disorders [MeSH], perfluoroalkyl acids, perfluorooctanoic acid [MeSH], C8  
42 Health Panel Study  
43

44 **Running title:** perfluoroalkyl acids and memory impairment  
45

46 **Word count:** 3,241  
47  
48  
49  
50  
51  
52  
53  
54  
55  
56  
57  
58  
59  
60

## Summary

### Article focus

- Cross-sectional association between serum level of Perfluorooctanate (PFOA), perfluorooctane sulfonate (PFOS), perfluorononanoic acid (PFNA) and perfluorohexane sulfonate (PFHxS) and self-reported memory impairment in a population exposed to high levels of PFOA
- Potential interaction between the association of perfluoroalkyl acids (PFAAs) with memory impairment by diabetes status

### Key Message

- Inverse associations between PFOS and PFOA and memory impairment were statistically significant perhaps due to a potential anti-inflammatory effect exerted through PPAR agonism. Comparable inverse associations with PFNA and PFHxS were of borderline statistical significance
- Inverse associations of PFAAs with memory impairment were weaker or non-existent in diabetics than overall in non-diabetics. Analysis further stratified by specific diabetes medication use showed no variation in odds ratios more than explicable by chance given the number of tests made.

### Strengths and limitations

- Very large sample size including 21,024 adults with measured serum level of Perfluoroalkyl acids (PFAAs) with a given geographical distribution allowing some multilevel modelling
- The cross-sectional nature of the design does not allow any causal inference and makes results particularly prone to reverse causality
- Self-reported is not an optimal method for estimating the degree of memory impairment in a population

**ABSTRACT**

**Objectives** – To examine the cross-sectional association between serum PFOA, PFOS, PFNA, and PFHxS concentrations with self-reported memory impairment in adults and the interaction of these associations with diabetes status

**Design** - Cross-sectional study

**Setting** – Population-based in Mid-Ohio Valley, West Virginia following contamination by a chemical plant

**Participants** - The C8 Health Project collected data and measured serum level of PFAAs of 21,024 adults aged 50+ years

**Primary outcome measure** – Self-reported memory impairment as defined by the question “have experienced short term memory loss?”

**Results** - A total of 4,057 subjects self-reported short-term memory impairment. Inverse associations between PFOS and PFOA and memory impairment were highly statistically significant with fully adjusted OR=0.93 (95% C.I. 0.90-0.96) for doubling PFOS and OR=0.96 (95% C.I. 0.94-0.98) for doubling PFOA concentrations. Comparable inverse associations with PFNA and PFHxS were of borderline statistical significance. Inverse associations of PFAAs with memory impairment were weaker or non-existent in diabetics than overall in non-diabetics.

**Conclusion** - An inverse association between PFAA serum levels and self-reported memory impairment has been observed in this large population-based, cross-sectional study stronger and more statistically significant for PFOA and PFOS. The associations can be potentially explained by preventive anti-inflammatory effect exerted by a PPAR agonist effect of these PFAAs, but confounding or even reverse causation cannot be excluded as an alternative explanation.

## INTRODUCTION

Perfluoroalkyl acids (PFAAs) are man-made compounds used during the manufacture of fluoropolymers including non-stick cookware and breathable, yet waterproof, fabrics. They can also result from the metabolism of fluorinated telomers, compounds used for food package coatings, carpet treatments, and stain-resistant fabric treatment. Perfluorooctanate (PFOA), perfluorooctane sulfonate (PFOS), perfluorononanoic acid (PFNA) and perfluorohexane sulfonate (PFHxS) persist in the environment and are found in the blood of humans and many animal species throughout the world<sup>1,2</sup>. Potential sources of exposure to PFAAs in humans include drinking water, dust, breast milk, fish and other foods, food packaging, ambient air, and occupational exposure<sup>3-6</sup>.

In animal models, perfluoroalkyl chemicals can activate peroxisome proliferator-activated receptor alpha (PPAR $\alpha$ ), a ligand-activated transcription factor that regulates gene expression, lipid modulation, glucose homeostasis, cell proliferation and inflammation<sup>7,8</sup>. The PPAR receptor has been involved in the ageing process: PPAR $\alpha$  null mice showed a decreased longevity compared with the wild-type due to non-neoplastic spontaneous ageing lesions which occurred with a higher incidence and a short latency in the PPAR $\alpha$  null mice<sup>9</sup>. Also PPAR $\gamma$  variants were reported to be associated with longevity in humans with low insulin resistance<sup>10,11</sup>. Activation of the PPAR $\gamma$  receptor *in vitro* and *in vivo* also prevents the expression of inflammatory cytokines and other inflammatory mediators in brains of Alzheimer disease animal models<sup>12,13</sup>. In addition, PPAR $\gamma$  agonists have been demonstrated to suppress the A $\beta$ -mediated activation of microglia *in vitro* and prevent cortical or hippocampal neuronal cell death<sup>14-16</sup>. PPAR $\gamma$  is also deeply involved in diabetes, given its ability to orchestrate the expression of genes involved in lipid metabolism, adipogenesis, and inflammation. It is activated by endogenous ligands (such as fatty acids and prostaglandins) or drugs such as thiazolidinedione. It is most highly expressed in adipocytes where it acts as the master regulator of adipogenesis via induction of adipogenic genes<sup>17</sup>. However, a study *in vitro* showed that PFOA and PFOS activate differentially PPAR $\alpha$  and PPAR $\gamma$  receptors, but it is not possible to directly extrapolate these results to toxicity studies *in vivo*<sup>18</sup>. Therefore, in line with what was recently observed by Power et al<sup>19</sup>, we hypothesised that increased exposure to PFAA could be associated with a better cognitive function.

The positive association between diabetes and cognitive impairment is well established<sup>20</sup>; some studies investigating the association between PFOA exposure and diabetes suggested the presence of an inverse association: a negative trend in diabetes occurrence by increasing serum PFOA deciles

1  
2  
3 was found in a case-control study nested in a previous study based on the population investigated  
4 here <sup>21 22</sup>; but not in others <sup>23 24</sup>.

5  
6  
7 From 1950-2005, a chemical plant in the Mid-Ohio Valley, West Virginia was responsible for emitting  
8 PFOA into the surrounding environment. In 2001, a group of residents from the nearby West Virginia  
9 and Ohio communities filed a class action lawsuit alleging health damage from drinking water  
10 supplies drawing on PFOA-contaminated groundwater <sup>25</sup>. Part of the pre-trial settlement of the class  
11 action lawsuit included a baseline survey, the C8 Health Project, conducted in 2005-2006, that  
12 gathered data from over 69,000 people from six contaminated water districts surrounding the plant  
13 <sup>25</sup>. In this population, PFOA concentrations ranged from US background levels to very high; overall  
14 PFOA levels are much higher in this population (geometric mean 42.6.0 ng/mL, 95% C.I. 41.8-43.3)  
15 than in the corresponding US population surveys (NHANES in same year mean 3.95 ng/mL, 95% C.I.  
16 3.65-4.27) <sup>1 25</sup>. The mean PFOS (geometric mean 22.4, 95% C.I. 22.2-22.6), PFNA (1.37, 95% C.I. 1.36-  
17 1.38), and PFHxS (3.18, 95% C.I. 3.15-3.22) closely resembled values from a nationally representative  
18 US sample from a similar time frame (mean PFOS 20.7, 95% C.I. 19.2-22.3; mean PFNA 0.97, 95% C.I.  
19 0.82-1.14; and PFHxS 1.93, 95% C.I. 1.73-2.16) <sup>1</sup>.

20  
21  
22 The present study uses these data to examine the cross-sectional association between serum PFOA,  
23 PFOS, PFNA, and PFHxS concentrations with self-reported memory impairment in adults, and its  
24 potential interaction with diabetes status.  
25  
26  
27  
28  
29  
30  
31  
32  
33  
34  
35  
36  
37  
38  
39  
40

## 41 **METHODS**

### 42 **The Study population**

43  
44 This study is one of the C8 Science Panel Studies and uses information from questionnaires and  
45 blood tests collected in the C8 Health Project, supplemented by further information on classification  
46 by water district developed in a companion C8 Science Panel Study.  
47  
48  
49  
50

51  
52 The C8 Health Project enrolled eligible subjects between August 2005 and August 2006. Individuals  
53 were eligible to participate in the C8 Health Project if they had consumed water for at least one year  
54 between 1950 and December 3, 2004 while living, working, or going to school in one of the following  
55 six water districts: Little Hocking Water Association of Ohio; City of Belpre, Ohio; Tupper Plains-  
56  
57  
58  
59  
60

1  
2  
3 Chester District of Ohio; Village of Pomeroy, Ohio; Lubeck Public Service District of West Virginia;  
4 Mason County Public Service District of West Virginia; or private water sources within  
5  
6 aforementioned districts and areas of documented PFOA contamination. Details of the study  
7  
8 enrolment process, including consenting procedures, have been described elsewhere<sup>25</sup>.  
9

10  
11 The C8 Health Project collected data on 69,030 people. The participation rate for the C8 Health  
12  
13 Project based on US census counts of residents in the affected water districts during Project  
14  
15 enrolment, have been estimated at around 80%<sup>25</sup>. In this population, the strongest predictor of  
16  
17 PFOA serum concentration was residence in one of the contaminated water districts<sup>26</sup>; serum levels  
18  
19 of other PFAAs do not show such geographic variation. Of the population, 21,724 older adults (aged  
20  
21 ≥50 years) were considered for this analysis, and a total of 21,024 (96.8%) were included in the final  
22  
23 analysis after exclusion of subjects with missing data on ethnicity, education level, socio-economic  
24  
25 status, cigarette smoking, or BMI measurements.  
26

### 27 **Memory impairment definition**

28 During the survey (2005-2006), all participants were asked if they “had experienced short term  
29  
30 memory loss”, the possible answers being “frequently”, “sometimes”, “rarely”, and “never”. The  
31  
32 principle analyses assessed memory impairment defined as reporting short-term memory loss  
33  
34 frequently or sometimes, compared to rarely and never. Memory impairment ever was also  
35  
36 considered, defined as reporting any memory loss and compared to the never category.  
37

### 38 **Laboratory analysis**

39 Blood samples were obtained and processed at individual data collection sites. Samples were drawn  
40  
41 into four tubes per participant, with a maximum 35 mL. Tubes were spun, aliquoted, and  
42  
43 refrigerated until shipping. Samples were shipped on dry ice daily from each data collection site to  
44  
45 the laboratory daily<sup>25</sup>. Participants were not asked to fast before blood sample withdrawal, but  
46  
47 fasting status was recorded.

48 Laboratory analysis of PFAAs used an automated solid-phase extraction combined with reverse-  
49  
50 phase high-performance liquid chromatography<sup>27</sup>. Analyses were conducted by the Exygen Research  
51  
52 Inc., State College, PA, USA; an intra-laboratory quality assurance program was carried out by  
53  
54 analysis of duplicate samples at AXYS Analytical Service Ltd., Sidney, BC, Canada<sup>25</sup>. The intra-  
55  
56 laboratory coefficient of variation for all PFAAs measurements was 0.1; the inter-laboratory  
57  
58 comparison coefficient of variation was 0.2 for PFOA and PFNA, 0.1 for PFOS, and not applicable for  
59  
60 PFHxA as all in the second lab measurement values were below level of detection<sup>25</sup>. The detection

1  
2  
3 limit for all PFAAs was 0.5 ng/mL and observations below this limit were assigned a value of 0.25  
4 ng/mL ( $n=16$ ,  $n=101$ ,  $n=532$ , and  $n=387$  for PFOA, PFOS, PFNA, and PFHxS, respectively, for this study  
5 population). All PFAAs concentration distributions were skewed to the right. Methods and results  
6 are reported according to STROBE-ME recommendations<sup>28</sup>.  
7  
8  
9

### 10 11 **Statistical analysis**

12 Associations between exposure (serum concentration of PFOA, PFOS, PFNA, and PFHxS) and memory  
13 impairment were studied using logistic regression. Minimally adjusted models included age, in one  
14 year age-band, race (white, black, and others), gender, and educational level (high school diploma or  
15 general educational development (GED), some college, bachelor degree or higher) (Model 1).  
16 Further adjusted models additionally included average household income ( $\leq \$10,000$ ,  $\$10,001-$   
17  $20,000$ ,  $\$20,001-30,000$ ,  $\$30,001-40,000$ ,  $\$40,001-50,000$ ,  $\$50,001-60,000$ ,  $\$60,001-70,000$ ,  
18  $> \$70,000$ ), physical activity, alcohol consumption (none,  $<1$  drink/month,  $<1$  drink/week, few  
19 drinks/week,  $>1$  drink/day) and cigarette smoking (never smoker, former smoker, current smoker  
20  $<10$  cigarettes/day, current smoker 10-19 cigarettes/day, current smoker  $\geq 20$  cigarettes/day) (Model  
21 2). Fully adjusted models included also body mass index (BMI) (underweight/normal weight;  
22 overweight; and obese class I, II, and III), and diabetes (Model 3). PFAA concentrations were log-  
23 transformed to reduce skewness. For each model the association between PFAAs and self-reported  
24 memory impairment was calculated for a doubling in PFAA concentration in a model with PFAA  
25 entered as continuous covariate, for quintile groups of the PFAA distribution, and by ordinal  
26 regression analysis with the outcome variable comprising the four original levels of self-reported  
27 frequency of episodes of memory loss, again in relation to a doubling of PFAAs. To explore possible  
28 differential effect of PFAA in sub-groups, analyses were further stratified by diabetes status and,  
29 among diabetics, by type of medications.  
30  
31  
32  
33  
34  
35  
36  
37  
38  
39  
40  
41  
42

43 The following four sensitivity analyses were carried out: firstly one analysis restricting the sample to  
44 7,097 subjects aged 65 years and older. Secondly, an analysis conducted on the entire sample, but  
45 using as outcome definition those reporting any memory loss (frequently, sometimes, and rarely).  
46 Our final sensitivity analysis utilises the geographical clustering of PFOA exposure by water districts  
47 which allowed use to decompose the overall estimate of association of PFOA with memory  
48 impairment into within and between water district components, by including as explanatory  
49 variables both water district mean logged PFOA serum concentration and the deviations of  
50 individual's values from their district mean<sup>29</sup>. These two associations are subject to different  
51 potential biases, so help interpretation.  
52  
53  
54  
55  
56  
57  
58  
59  
60

### Role of funding

Funding for this work, the “C8 Science Panel Community Study at London School of Hygiene and Tropical Medicine - LSHTM”, comes from the C8 Class Action Settlement Agreement (Circuit Court of Wood County, WV, USA) between DuPont and plaintiffs, which resulted from releases of PFOA (or C8) into drinking water. It is one of the C8 Science Panel Studies undertaken by the Court-approved C8 Science Panel established under the same Settlement Agreement. The task of the C8 Science Panel, of which Tony Fletcher is a member, is to undertake research in the Mid-Ohio Valley, and subsequently evaluate the results along with other available information to determine if there are any probable links between PFOA and disease. Funds were administered by the Garden City Group (Melville, NY) that reports to the Court. The authors of this manuscript declare that their ability to design, conduct, interpret, or publish research was unimpeded by and fully independent of the court and/or settling parties. In addition, they declare no competing financial interests. The LSHTM Ethics Committee approved this study.

### RESULTS

A total of 4,462 subjects (21.2% of the entire population of 21,024 individuals aged 50 years or older) self-reported short-term memory impairment (**Error! Reference source not found.**): episodes of short-term memory loss were reported frequently by 1,115 subjects (5.3%); sometimes by 3,347 (15.9%); rarely by 4,283 (20.4%) and never by 12,279 (58.4%). Many personal characteristics were associated individually with memory loss, including higher age, lower socio-economic status, smoking, and diagnosis of diabetes (Table 1), though to what extent these reflected independent risk factors was not investigated.

Results from the logistic regression of association between PFAAs and memory impairment are shown in Table 2. Results for minimally, further and fully adjusted models were similar, so we show only further adjusted results in this table, but results for all models are in the on-line Table 1. Inverse associations between PFOS and PFOA and memory impairment were highly statistically significant with adjusted OR=0.93 (0.90-0.96) for PFOS and OR=0.96 (0.94-0.98) for PFOA for doubling PFAA concentrations. Inverse associations of similar magnitude with PFNA and PFHxS but of borderline statistical significance were found: OR=0.96 (0.92-1.02) for PFNA and OR=0.97 (0.94-1.00) for PFHxS. The analysis by PFAA quintile groups shows similar patterns.



1  
2  
3 Inverse associations of PFAAs with memory impairment were weaker or non-existent in diabetics  
4 than for non-diabetics (Table 3), though odds ratios were imprecise, and the difference by diabetes  
5 status was only significant for PFOA (p-value for interaction = 0.014). Analysis further stratified by  
6 specific diabetes medication use showed no variation in odds ratios more than explicable by chance  
7 given the number of tests made (on-line Table 2).  
8  
9

10  
11 In the sensitivity analysis on subjects older than 65 years, the substantial reduction of the sample  
12 size resulted in loss of precision in odds ratios. However, the points estimates of associations with  
13 memory impairment were of comparable magnitude for all PFAAs except PFOA for which the  
14 association with memory impairment was close to null (OR= 0.99 (0.97-1.03)) (Table 4).  
15  
16

17  
18 The analysis carried out on the entire sample, comparing those with any memory impairment  
19 against those with no memory problems shows slightly weaker associations for each PFAAs but  
20 precision was reduced (Table 4). Analyses using ordinal regression in place of binary logistic  
21 regression yielded similar results to the logistic regressions (Table 2, Table 3, and Table 4).  
22  
23

24  
25 The analysis separating the PFOA-memory impairment association into within and between water  
26 district components found that within water districts there was an inverse association between  
27 PFOA and memory impairment, as in the overall association (OR 0.94, 95%CI 0.91-0.98, scale and  
28 adjustments as before). However there was no association between geometric mean concentration  
29 by and memory impairment (OR 1.00, 95%CI 0.97-1.03, per doubling in geometric mean PFOA by  
30 district).  
31  
32

33  
34 Extra data is available upon request by emailing Tony Fletcher (tony.fletcher@lshtm.ac.uk).  
35  
36  
37  
38  
39  
40  
41  
42  
43

#### 44 **DISCUSSION**

45  
46 An inverse association between PFAAs serum levels (including PFOS, PFOA, PNA, and PFHxS) and  
47 self-reported memory impairment has been observed in this large population-based, cross-sectional  
48 study. This association is more clearly monotonic with increasing exposure, and more statistically  
49 significant for PFOA and PFOS. However, the consistent decrement for all PFAAs suggests a common  
50 mechanism.  
51  
52

53  
54 It is plausible that PFAAs could have an effect on cognitive function via PPAR agonism. Although it is  
55 not clear to what extent PFAAs act differentially on PPAR receptors  $\alpha$  and  $\gamma$ <sup>18</sup>, it could be speculated  
56  
57  
58  
59  
60

1  
2  
3 that this association might be mediated by the activation of the PPAR receptor by PFAAs. Activation  
4 of the PPAR $\gamma$  receptors has been shown to decrease the secretion of proinflammatory cytokines and  
5 possibly increase phagocytosis of A $\beta$  inclusions, probably through activation of microglia<sup>30</sup>. However  
6 there was suggestion that this effect of suppression of the activation of microglia was age-  
7 dependent or disease stage-dependent being not significant in patients with advanced Alzheimer's  
8 disease (AD)<sup>31 32</sup>. PPAR agonist drugs, such as non-steroidal anti-inflammatory drugs (NSAID) and  
9 some anti-diabetics (i.e. thiazolidinedione or pioglitazone) have been proposed as preventive drugs  
10 for neurodegenerative conditions, including Alzheimer's dementia<sup>30 33</sup>.

11  
12  
13  
14  
15  
16  
17 In a previous published study an inverse association between PFAAs and memory impairment was  
18 observed specifically among non-medicated diabetics<sup>19</sup>. In the present study, this pattern was not  
19 replicated, with the inverse association between PFAAs and cognitive impairment being more  
20 evident in those without diabetes; among diabetics, the association was not present, irrespective of  
21 treatment status. This finding could be explained by the fact that in diabetics PPAR receptors are  
22 more phosphorylated with a consequent reduced transcriptional activity<sup>34 35</sup>, and the balance  
23 between PPAR $\gamma$  expression and activity levels is altered<sup>34 36</sup>. It is therefore possible – based on the  
24 present data – that the PPAR-agonist effect of PFAAs is different in subjects with and without PPAR-  
25 mediated metabolic changes such as diabetes. Also, it has been reported that PFAAs have a PPAR  
26 agonist effect, more prominently PPAR- $\alpha$ <sup>37</sup>; animal models suggest that PFOA has a stronger  
27 agonistic effect than PFOS<sup>37</sup>. Our findings of an inverse association between PFAA and memory  
28 impairment among non-diabetics, would therefore be compatible with a possible anti-inflammatory  
29 role exerted by PFAA on early symptoms of cognitive impairment.

30  
31  
32  
33  
34  
35  
36  
37  
38  
39  
40  
41  
42  
43  
44  
45  
46  
47  
48  
49  
50  
51  
52  
53  
54  
55  
56  
57  
58  
59  
60  
There is some evidence of detrimental effects of PFAAs in neurodevelopment of mice affecting the  
cholinergic system and cognitive function<sup>38-40</sup>, thus timing of exposure may also be relevant in order  
for the PFAAs to exert this hypothesised anti-dementing role. However, these findings should be  
interpreted cautiously given the limitations of the study. Firstly, given the cross-sectional nature of  
the study, reverse causality must be considered: subjects suffering from memory impairment could  
have consumed less of these compounds via water and food sources, though this is not a likely  
explanation given the consistency of the association across various PFAAs which have substantially  
different routes of exposure. Host characteristics such as genotype could be correlated with both  
some mechanism predisposing these symptoms and variation in PFAA excretion rates, thus leading  
to a confounded association with serum levels. Further, self-report is not a very accurate method for  
ascertaining memory impairment, although errors in classification would be expected to be non-  
differential misclassification, biasing the estimate of association towards the null. The effects of

1  
2  
3 PFAA have been mostly studied in relation to PPAR $\alpha$ <sup>7</sup>, while the receptor mostly implicated in  
4 metabolic changes and diabetes and in dementia PPAR $\gamma$ <sup>30</sup>; however, these two belong to the same  
5 receptor family and some degree of cross-activation cannot be excluded, and the knowledge of their  
6 pleiotropic effects is currently advancing<sup>41</sup>. Lastly, the classification into different anti-diabetic  
7 medications is uncertain as these were self-reported and not prompted by interviewers. However,  
8 we consider it very unlikely that any misreporting would be confounded with serum PFAAs. This  
9 would tend to low specificity and thus bias of the association (if any) towards the null.  
10

11  
12  
13  
14  
15 On the other hand, strengths of this study include the fact that all showed estimates were adjusted  
16 for numerous potential confounders, including age in one-year age bands, making the effect of PFAA  
17 on memory impairment not likely to be confounded by lifestyle characteristics. Furthermore, these  
18 results are based on a very large population representative of the general population in West  
19 Virginia and Ohio<sup>25</sup>, thus estimates are solid; and the 21% prevalence of memory impairment is  
20 compatible and consistent with figures on prevalence of dementia reported for North America (Ferri  
21 et al, 2005).  
22  
23  
24  
25  
26

27 Individual serum levels reflect the contributions of both intake and retention/excretion rates. While  
28 we have no direct data on either of these components, the large differences in drinking water  
29 contamination and associated average population serum levels for PFOA in the 6 water districts,  
30 allow an estimate of the effect of exposure. That the association with PFOA was entirely within  
31 water districts, and not present at all between water districts despite large differences in (geometric)  
32 mean PFOA between districts (range 15.7 – 405.1) is suggestive of a bias operating at one or both of  
33 these levels. The between district estimate is not vulnerable to reverse causation or confounding at  
34 individual level, though some ecological confounding may operate if it happens to correlate with  
35 exposure level. Conversely the within district estimate but not between district estimate could  
36 reflect such individual confounding if present. Thus either the association documented at individual  
37 level could be confounded (e.g. by some unmeasured individual characteristic); or that the  
38 association at the district level is confounded to obscure association (for example socio-economic  
39 status). This sensitivity analysis cannot prove the presence of confounding at either level, but if the  
40 association had been consistent at both individual and district level that would have been more  
41 convincing of the association being due to PFAAs.  
42  
43  
44  
45  
46  
47  
48  
49  
50  
51

52 The size of the associations observed has both strong and weak aspects. The strong statistical  
53 significance suggests chance is an unlikely explanation. However, the odds ratios are only modestly  
54 different from one, 0.75 at the most extreme, so that biases are a more plausible explanation than  
55 they would be with more extreme ratios. In conclusion, these data show an inverse association  
56  
57  
58  
59  
60

1  
2  
3 between PFOA and PFOS exposure and self-reported memory-impairment, particularly in non  
4 diabetics. This can be potentially explained by preventive anti-inflammatory effect exerted by a  
5 PPAR agonist effect of these PFAAs, but confounding or even reverse causation cannot be excluded  
6 as an alternative explanation.  
7  
8  
9

#### 10 11 12 **ACKNOWLEDGMENTS**

13  
14 We are grateful to Dr Marc Weiskopf for his thoughtful comments on the draft of this manuscript,  
15 and for constructive idea sharing and discussions on this topic.  
16  
17  
18  
19

20  
21 **COMPETING INTERESTS:** The authors declare no competing financial interests  
22  
23  
24  
25  
26  
27  
28  
29  
30  
31  
32  
33  
34  
35  
36  
37  
38  
39  
40  
41  
42  
43  
44  
45  
46  
47  
48  
49  
50  
51  
52  
53  
54  
55  
56  
57  
58  
59  
60

## References

1. Kato K, Wong LY, Jia LT, et al. Trends in Exposure to Polyfluoroalkyl Chemicals in the U.S. Population: 1999-2008 (dagger). *Environ Sci Technol* 2011.
2. Tao L, Kannan K, Kajiwara N, et al. Perfluorooctanesulfonate and related fluorochemicals in albatrosses, elephant seals, penguins, and polar skuas from the Southern Ocean. *Environmental science & technology* 2006;40(24):7642-8.
3. Kim SK, Lee KT, Kang CS, et al. Distribution of perfluorochemicals between sera and milk from the same mothers and implications for prenatal and postnatal exposures. *Environ Pollut* 2011;159(1):169-74.
4. Lau C, Anitole K, Hodes C, et al. Perfluoroalkyl acids: a review of monitoring and toxicological findings. *Toxicological sciences : an official journal of the Society of Toxicology* 2007;99(2):366-94.
5. D'Hollander W, de Voogt P, De Coen W, et al. Perfluorinated substances in human food and other sources of human exposure. *Reviews of environmental contamination and toxicology* 2010;208:179-215.
6. Goosey E, Harrad S. Perfluoroalkyl compounds in dust from Asian, Australian, European, and North American homes and UK cars, classrooms, and offices. *Environment international* 2011;37(1):86-92.
7. DeWitt JC, Shnyra A, Badr MZ, et al. Immunotoxicity of perfluorooctanoic acid and perfluorooctane sulfonate and the role of peroxisome proliferator-activated receptor alpha. *Critical reviews in toxicology* 2009;39(1):76-94.
8. Peters JM, Gonzalez FJ. Why toxic equivalency factors are not suitable for perfluoroalkyl chemicals. *Chemical research in toxicology* 2011;24(10):1601-9.
9. Howroyd P, Swanson C, Dunn C, et al. Decreased longevity and enhancement of age-dependent lesions in mice lacking the nuclear receptor peroxisome proliferator-activated receptor alpha (PPARalpha). *Toxicologic pathology* 2004;32(5):591-9.
10. Capri M, Salvioli S, Sevini F, et al. The genetics of human longevity. *Annals of the New York Academy of Sciences* 2006;1067:252-63.
11. Paolisso G, Barbieri M, Rizzo MR, et al. Low insulin resistance and preserved beta-cell function contribute to human longevity but are not associated with TH-INS genes. *Experimental gerontology* 2001;37(1):149-56.
12. Heneka MT, Feinstein DL, Galea E, et al. Peroxisome proliferator-activated receptor gamma agonists protect cerebellar granule cells from cytokine-induced apoptotic cell death by inhibition of inducible nitric oxide synthase. *Journal of neuroimmunology* 1999;100(1-2):156-68.
13. Heneka MT, Klockgether T, Feinstein DL. Peroxisome proliferator-activated receptor-gamma ligands reduce neuronal inducible nitric oxide synthase expression and cell death in vivo. *The Journal of neuroscience : the official journal of the Society for Neuroscience* 2000;20(18):6862-7.
14. Combs CK, Johnson DE, Karlo JC, et al. Inflammatory mechanisms in Alzheimer's disease: inhibition of beta-amyloid-stimulated proinflammatory responses and neurotoxicity by PPARgamma agonists. *The Journal of neuroscience : the official journal of the Society for Neuroscience* 2000;20(2):558-67.
15. Kim EJ, Kwon KJ, Park JY, et al. Effects of peroxisome proliferator-activated receptor agonists on LPS-induced neuronal death in mixed cortical neurons: associated with iNOS and COX-2. *Brain research* 2002;941(1-2):1-10.
16. Luna-Medina R, Cortes-Canteli M, Alonso M, et al. Regulation of inflammatory response in neural cells in vitro by thiadiazolidinones derivatives through peroxisome proliferator-activated receptor gamma activation. *The Journal of biological chemistry* 2005;280(22):21453-62.

17. Whitehead JP. Diabetes: New conductors for the peroxisome proliferator-activated receptor gamma (PPARgamma) orchestra. *The international journal of biochemistry & cell biology* 2011;43(8):1071-4.
18. Takacs ML, Abbott BD. Activation of mouse and human peroxisome proliferator-activated receptors (alpha, beta/delta, gamma) by perfluorooctanoic acid and perfluorooctane sulfonate. *Toxicological sciences : an official journal of the Society of Toxicology* 2007;95(1):108-17.
19. Power MC, Webster TF, Baccarelli AA, et al. Cross-Sectional Association between Polyfluoroalkyl Chemicals and Cognitive Limitation in the National Health and Nutrition Examination Survey. *Neuroepidemiology* 2012;40(2):125-32.
20. McCrimmon RJ, Ryan CM, Frier BM. Diabetes and cognitive dysfunction. *Lancet* 2012;379(9833):2291-9.
21. MacNeil J, Steenland NK, Shankar A, et al. A cross-sectional analysis of type II diabetes in a community with exposure to perfluorooctanoic acid (PFOA). *Environmental research* 2009;109(8):997-1003.
22. Steenland K, Fletcher T, Savitz DA. Epidemiologic evidence on the health effects of perfluorooctanoic acid (PFOA). *Environmental health perspectives* 2010;118(8):1100-8.
23. Lin CY, Chen PC, Lin YC, et al. Association among serum perfluoroalkyl chemicals, glucose homeostasis, and metabolic syndrome in adolescents and adults. *Diabetes care* 2009;32(4):702-7.
24. Lundin JI, Alexander BH, Olsen GW, et al. Ammonium perfluorooctanoate production and occupational mortality. *Epidemiology* 2009;20(6):921-8.
25. Frisbee SJ, Brooks AP, Jr., Maher A, et al. The C8 health project: design, methods, and participants. *Environmental health perspectives* 2009;117(12):1873-82.
26. Steenland K, Jin C, MacNeil J, et al. Predictors of PFOA levels in community surrounding a chemical plant. *Environ Health Perspect* 2009;in press.
27. Kuklenyik Z, Reich JA, Tully JS, et al. Automated solid-phase extraction and measurement of perfluorinated organic acids and amides in human serum and milk. *Environmental science & technology* 2004;38(13):3698-704.
28. Gallo V, Egger M, McCormack V, et al. STrengthening the Reporting of OBServational studies in Epidemiology - Molecular Epidemiology (STROBE-ME): An Extension of the STROBE Statement. *PLoS Med* 2011;8(10):e1001117.
29. Gallo V, Leonardi G, Genser B, et al. Serum Perfluorooctanoate (PFOA) and Perfluorooctane Sulfonate (PFOS) Concentrations and Liver Function Biomarkers in a Population with Elevated PFOA Exposure. *Environ Health Perspect* 2012.
30. Lleo A, Galea E, Sastre M. Molecular targets of non-steroidal anti-inflammatory drugs in neurodegenerative diseases. *Cellular and molecular life sciences : CMLS* 2007;64(11):1403-18.
31. Alafuzoff I, Overmyer M, Helisalmi S, et al. Lower Counts of Astroglia and Activated Microglia in Patients with Alzheimer's Disease with Regular Use of Non-Steroidal Anti-Inflammatory Drugs. *Journal of Alzheimer's disease : JAD* 2000;2(1):37-46.
32. Jimenez S, Baglietto-Vargas D, Caballero C, et al. Inflammatory response in the hippocampus of PS1M146L/APP751SL mouse model of Alzheimer's disease: age-dependent switch in the microglial phenotype from alternative to classic. *The Journal of neuroscience : the official journal of the Society for Neuroscience* 2008;28(45):11650-61.
33. Revill P, Moral MA, Prous JR. Impaired insulin signaling and the pathogenesis of Alzheimer's disease. *Drugs Today (Barc)* 2006;42(12):785-90.
34. Anbalagan M, Huderson B, Murphy L, et al. Post-translational modifications of nuclear receptors and human disease. *Nucl Recept Signal* 2012;10:e001.
35. Choi JH, Banks AS, Estall JL, et al. Anti-diabetic drugs inhibit obesity-linked phosphorylation of PPARgamma by Cdk5. *Nature* 2010;466(7305):451-6.

- 1  
2  
3 36. Hauser S, Adelmant G, Sarraf P, et al. Degradation of the peroxisome proliferator-activated  
4 receptor gamma is linked to ligand-dependent activation. *The Journal of biological chemistry*  
5 2000;275(24):18527-33.  
6  
7 37. Wolf CJ, Takacs ML, Schmid JE, et al. Activation of mouse and human peroxisome proliferator-  
8 activated receptor alpha by perfluoroalkyl acids of different functional groups and chain  
9 lengths. *Toxicological sciences : an official journal of the Society of Toxicology*  
10 2008;106(1):162-71.  
11  
12 38. Johansson N, Eriksson P, Viberg H. Neonatal exposure to PFOS and PFOA in mice results in  
13 changes in proteins which are important for neuronal growth and synaptogenesis in the  
14 developing brain. *Toxicological sciences : an official journal of the Society of Toxicology*  
15 2009;108(2):412-8.  
16  
17 39. Johansson N, Fredriksson A, Eriksson P. Neonatal exposure to perfluorooctane sulfonate (PFOS)  
18 and perfluorooctanoic acid (PFOA) causes neurobehavioural defects in adult mice.  
19 *Neurotoxicology* 2008;29(1):160-9.  
20  
21 40. Viberg H, Lee I, Eriksson P. Adult dose-dependent behavioral and cognitive disturbances after a  
22 single neonatal PFHxS dose. *Toxicology* 2013;304:185-91.  
23  
24 41. Staels B, Fruchart JC. Therapeutic roles of peroxisome proliferator-activated receptor agonists.  
25 *Diabetes* 2005;54(8):2460-70.  
26  
27  
28  
29  
30  
31  
32  
33  
34  
35  
36  
37  
38  
39  
40  
41  
42  
43  
44  
45  
46  
47  
48  
49  
50  
51  
52  
53  
54  
55  
56  
57  
58  
59  
60



Table 1: Participant Characteristics, Mid-Ohio Valley, 2005-2006 (N=21,024)

|                                     | All<br>N=21,024* | Memory impaired<br>N=4,462^ |
|-------------------------------------|------------------|-----------------------------|
| Males, n (%)                        | 10,353 (49.2)    | 2,040 (19.7)                |
| Females, n (%)                      | 10,671 (50.8)    | 2,422 (22.7)                |
| Age, median/mean (SD)               | 60.5/62.3 (9.0)  | 59.9/62.3 (9.4)             |
| <b>Age groups</b>                   |                  |                             |
| 50-54 years                         | 5,381 (25.6)     | 1,185 (22.0)                |
| 55-59 years                         | 4,831 (23.0)     | 1,055 (21.8)                |
| 60-64 years                         | 3,715 (17.7)     | 740 (19.9)                  |
| 65-69 years                         | 2,930 (13.9)     | 535 (18.3)                  |
| 70-74 years                         | 1,979 (9.4)      | 419 (21.2)                  |
| 75-79 years                         | 1,251 (6.0)      | 269 (21.5)                  |
| 80+ years                           | 937 (4.5)        | 259 (27.6)                  |
| Regular exercise, n (%)             | 6,774 (32.2)     | 1,306 (19.3)                |
| <b>BMI, n (%)</b>                   |                  |                             |
| Normal weight                       | 5,100 (24.3)     | 1,051 (20.6)                |
| Overweight                          | 8,194 (39.0)     | 1,612 (19.7)                |
| Obese class I                       | 4,789 (22.8)     | 1,028 (21.5)                |
| Obese class II                      | 1,805 (8.6)      | 457 (25.3)                  |
| Obese class III                     | 1,136 (5.4)      | 314 (27.6)                  |
| <b>Household income, \$/y n (%)</b> |                  |                             |
| ≤10,000                             | 1,486 (7.1)      | 448 (30.2)                  |
| 10,001-20,000                       | 3,059 (14.6)     | 757 (24.8)                  |
| 20,001-30,000                       | 3,281 (15.6)     | 751 (22.9)                  |
| 30,001-40,000                       | 2,936 (14.0)     | 572 (19.5)                  |
| 40,001-50,000                       | 2,135 (10.2)     | 422 (19.8)                  |
| 50,001-60,000                       | 1,815 (8.6)      | 359 (19.8)                  |
| 60,001-70,000                       | 1,367 (6.5)      | 268 (19.6)                  |
| >70,000                             | 2,882 (13.7)     | 480 (16.7)                  |
| Undetermined                        | 2,063 (9.8)      | 405 (19.6)                  |
| <b>Education, n (%)</b>             |                  |                             |
| < 12 years                          | 3,310 (15.7)     | 845 (25.5)                  |
| HS diploma or GED                   | 9,704 (46.2)     | 1,979 (20.4)                |
| Some college                        | 5,612 (26.7)     | 1,204 (21.5)                |
| Bachelor degree or higher           | 2,398 (11.4)     | 434 (18.1)                  |
| <b>Race, n (%)</b>                  |                  |                             |
| White                               | 20,514 (97.6)    | 4,349 (21.2)                |
| Black                               | 213 (1.0)        | 38 (17.8)                   |
| Other                               | 297 (1.4)        | 75 (25.3)                   |
| <b>Alcohol consumption, n (%)</b>   |                  |                             |
| None                                | 13,276 (63.2)    | 2,848 (21.5)                |
| < 1 drink/month                     | 2,589 (12.3)     | 597 (23.1)                  |
| < 1 drink/week                      | 1,530 (7.3)      | 309 (20.2)                  |
| Few drinks/week                     | 2,087 (9.9)      | 397 (19.0)                  |
| 1-3 drinks/day                      | 805 (3.8)        | 142 (17.6)                  |
| >3 drinks/day                       | 310 (1.5)        | 66 (21.3)                   |
| Undetermined                        | 427 (2.0)        | 103 (24.1)                  |
| <b>Smoking status, n (%)</b>        |                  |                             |
| Never smoker                        | 9,804 (46.6)     | 1,906 (19.4)                |
| Former smoker                       | 7,555 (35.8)     | 1,693 (22.5)                |
| Current smoker < 10 cig/day         | 1,212 (5.8)      | 256 (21.1)                  |
| Current smoker 10-19 cig/day        | 1,260 (6.0)      | 310 (24.6)                  |
| Current smoker 20+ cig/day          | 1,213 (5.8)      | 297 (24.5)                  |
| <b>Diabetes, n (%)</b>              |                  |                             |
| Thiazolidinedion use~               | 809 (23.5)       | 202 (25.0)                  |
| Other medications~                  | 1,244 (36.1)     | 321 (25.8)                  |
| No medication~                      | 1,390 (40.4)     | 352 (25.3)                  |

\*percentages refer to the proportion with respect to the entire population; ^percentages reflect the proportion of memory impaired in each category; percentages among diabetics only



Table 2: The association between PFAAs and self-report memory impairment in logistic regression for a doubling PFAA concentration, by quintiles of PFAAs, and in ordinal regression (n=21,024)

|                           | Range (ng/mL) | Adjusted OR and 95% C.I.* |
|---------------------------|---------------|---------------------------|
| <b>PFOS</b>               |               | 0.93 (0.90-0.96)          |
| 1 <sup>st</sup> quintile  | 0.25-14.4     | Ref.                      |
| 2 <sup>nd</sup> quintile  | 14.5-20.4     | 0.96 (0.87-1.07)          |
| 3 <sup>rd</sup> quintile  | 20.5-27.1     | 0.86 (0.78-0.96)          |
| 4 <sup>th</sup> quintile  | 27.2-37.2     | 0.87 (0.78-0.96)          |
| 5 <sup>th</sup> quintile  | 37.3-759.2    | 0.85 (0.76-0.94)          |
| <b>Trend</b>              |               | <0.001                    |
| <b>Ordinal regression</b> |               | 0.95 (0.93-0.98)          |
| <b>PFOA</b>               |               | 0.96 (0.94-0.98)          |
| 1 <sup>st</sup> quintile  | 0.25-14.0     | Ref.                      |
| 2 <sup>nd</sup> quintile  | 14.1-27.0     | 0.88 (0.79-0.97)          |
| 3 <sup>rd</sup> quintile  | 27.1-53.8     | 0.83 (0.75-0.92)          |
| 4 <sup>th</sup> quintile  | 53.9-118.1    | 0.79 (0.71-0.88)          |
| 5 <sup>th</sup> quintile  | 118.3-22,412  | 0.79 (0.71-0.88)          |
| <b>Trend</b>              |               | <0.001                    |
| <b>Ordinal regression</b> |               | 0.97 (0.96-0.98)          |
| <b>PFNA</b>               |               | 0.96 (0.91-1.00)          |
| 1 <sup>st</sup> quintile  | 0.25-0.90     | Ref.                      |
| 2 <sup>nd</sup> quintile  | 1.0-1.2       | 0.86 (0.78-0.96)          |
| 3 <sup>rd</sup> quintile  | 1.3-1.4       | 0.87 (0.77-0.98)          |
| 4 <sup>th</sup> quintile  | 1.5-1.9       | 0.86 (0.77-0.95)          |
| 5 <sup>th</sup> quintile  | 2.0-28.6      | 0.89 (0.80-0.99)          |
| <b>Trend</b>              |               | 0.053                     |
| <b>Ordinal regression</b> |               | 0.97 (0.94-1.01)          |
| <b>PFHxS</b>              |               | 0.96 (0.93-0.99)          |
| 1 <sup>st</sup> quintile  | 0.25-1.7      | Ref.                      |
| 2 <sup>nd</sup> quintile  | 1.8-2.6       | 1.01 (0.91-1.12)          |
| 3 <sup>rd</sup> quintile  | 2.7-3.6       | 1.02 (0.91-1.13)          |
| 4 <sup>th</sup> quintile  | 3.7-5.6       | 0.93 (0.84-1.04)          |
| 5 <sup>th</sup> quintile  | 5.7-232.6     | 0.89(0.79-0.99)           |
| <b>Trend</b>              |               | 0.009                     |
| <b>Ordinal regression</b> |               | 0.97 (0.94-0.99)          |

\*Model adjusted for age (one-year age bands), ethnicity, gender, and school level (categorical), household income (categorical), physical activity, alcohol consumption (categorical, none/<1drink/month, < 1 drink/week, few drinks/week, 1-3 drinks/day, >3 drinks/day, undetermined), and cigarette smoking (categorical, never, former, < 10 cig/day, 12-20 cig/day, 20+ cig/day)

Table 3: The association between PFAAs and self-report memory impairment in logistic regression for a doubling PFAA concentration, by quintiles of distribution, and in ordinal regression by diabetes status (validated by clinical records)

|                                | Range (ng/mL)   | OR (95% CI)*       | p for inter | N               | OR (95% CI)*       | p for inter |
|--------------------------------|-----------------|--------------------|-------------|-----------------|--------------------|-------------|
|                                | <b>PFOS</b>     |                    |             | <b>PFOA</b>     |                    |             |
|                                | <b>N=17,832</b> |                    |             | <b>N=17,832</b> |                    |             |
| <b>Non-diabetics</b>           |                 | 0.93 (0.90-0.96)†  | -           |                 | 0.95 (0.93-0.97) † | -           |
| <b>Ordinal regression</b>      |                 | 0.96 (0.93-0.99)   |             |                 | 0.96 (0.95-0.98)   |             |
| <b>1<sup>st</sup> quintile</b> | 0.25-14.5       | Ref.               |             | 0.25-14.3       | Ref.               |             |
| <b>2<sup>nd</sup> quintile</b> | 14.6-20.5       | 0.96 (0.86-1.08)   |             | 14.4-27.2       | 0.85 (0.76-0.95)   |             |
| <b>3<sup>rd</sup> quintile</b> | 20.6-27.0       | 0.90 (0.80-1.01)   |             | 27.3-54.3       | 0.82 (0.73-0.92)   |             |
| <b>4<sup>th</sup> quintile</b> | 27.1-37.1       | 0.88 (0.78-0.99)   |             | 54.4-119.1      | 0.76 (0.68-0.86)   |             |
| <b>5<sup>th</sup> quintile</b> | 37.2-759.2      | 0.85 (0.76-0.96)   |             | 119.2-8,416     | 0.75 (0.67-0.84)   |             |
| <b>Trend</b>                   |                 | 0.002              |             |                 | <0.001             |             |
|                                | <b>N=3,192</b>  |                    |             | <b>N=3,192</b>  |                    |             |
| <b>Diabetics</b>               |                 | 0.94 (0.88-1.02) † | 0.698       |                 | 1.02 (0.97-1.06) † | 0.014       |
| <b>Ordinal regression</b>      |                 | 0.95 (0.90-1.01)   |             |                 | 1.00 (0.97-1.04)   |             |
| <b>1<sup>st</sup> quintile</b> | 0.25-13.6       | Ref.               |             | 0.25-12.6       | Ref.               |             |
| <b>2<sup>nd</sup> quintile</b> | 13.7-20.0       | 1.06 (0.82-1.36)   |             | 12.7-25.4       | 1.04 (0.80-1.34)   |             |
| <b>3<sup>rd</sup> quintile</b> | 20.1-27.3       | 0.82 (0.63-1.06)   |             | 25.5-48.0       | 0.88 (0.67-1.14)   |             |
| <b>4<sup>th</sup> quintile</b> | 27.4-37.3       | 0.87 (0.67-1.13)   |             | 48.1-102.1      | 1.04 (0.80-1.35)   |             |
| <b>5<sup>th</sup> quintile</b> | 37.4-272.0      | 0.90 (0.69-1.17)   |             | 102.4-22,412    | 1.09 (0.84-1.42)   |             |
| <b>Trend</b>                   |                 | 0.162              |             |                 | 0.543              |             |
|                                | <b>PFNA</b>     |                    |             | <b>PFHxS</b>    |                    |             |
|                                | <b>N=17,832</b> |                    |             | <b>N=17,832</b> |                    |             |
| <b>Non-diabetics</b>           |                 | 0.95 (0.90-0.99) † | -           |                 | 0.96 (0.93-0.99) † | -           |
| <b>Ordinal regression</b>      |                 | 0.97 (0.93-1.01)   |             |                 | 0.97 (0.94-0.99)   |             |
| <b>1<sup>st</sup> quintile</b> | 0.25-0.9        | Ref.               |             | 0.25-1.8        | Ref.               |             |
| <b>2<sup>nd</sup> quintile</b> | 1.0-1.2         | 0.86 (0.77-0.97)   |             | 1.9-2.6         | 0.98 (0.87-1.10)   |             |
| <b>3<sup>rd</sup> quintile</b> | 1.3-1.5         | 0.85 (0.76-0.95)   |             | 2.7-3.7         | 0.99 (0.89-1.11)   |             |
| <b>4<sup>th</sup> quintile</b> | 1.6-1.9         | 0.83 (0.73-0.93)   |             | 3.8-5.7         | 0.93 (0.82-1.05)   |             |
| <b>5<sup>th</sup> quintile</b> | 2.0-28.6        | 0.88 (0.78-0.99)   |             | 5.8-232.6       | 0.88 (0.79-0.99)   |             |
| <b>Trend</b>                   |                 | 0.031              |             |                 | 0.029              |             |
|                                | <b>N=3,192</b>  |                    |             | <b>N=3,192</b>  |                    |             |
| <b>Diabetics</b>               |                 | 1.01 (0.90-1.13) † | 0.259       | 3,192           | 0.99 (0.92-1.06) † | 0.683       |
| <b>Ordinal regression</b>      |                 | 0.99 (0.91-1.09)   |             |                 |                    |             |
| <b>1<sup>st</sup> quintile</b> | 0.25-0.8        | Ref.               |             | 0.25-1.6        | Ref.               |             |
| <b>2<sup>nd</sup> quintile</b> | 0.9-1.1         | 1.06 (0.80-1.40)   |             | 1.7-2.3         | 1.06 (0.81-1.38)   |             |
| <b>3<sup>rd</sup> quintile</b> | 1.2-1.4         | 0.88 (0.66-1.17)   |             | 2.4-3.2         | 1.10 (0.85-1.42)   |             |
| <b>4<sup>th</sup> quintile</b> | 1.5-1.8         | 1.03 (0.77-1.36)   |             | 3.3-5.0         | 1.02 (0.79-1.33)   |             |
| <b>5<sup>th</sup> quintile</b> | 1.9-14.5        | 1.08(0.82-1.43)    |             | 5.1-99.7        | 1.00 (0.77-1.31)   |             |
| <b>Trend</b>                   |                 | 0.620              |             |                 | 0.942              |             |

\*using clinical record validated diagnosis of diabetes and self-reported use of medications, adjusted for age (one-year age bands), ethnicity, gender, school level (categorical), household income (categorical), physical activity, alcohol consumption (categorical, none/<1drink/month, < 1 drink/week, few drinks/week, 1-3 drinks/day, >3 drinks/day, undetermined), and cigarette smoking (categorical, never, former, < 10 cig/day, 12-20 cig/day, 20+ cig/day); † OR for doubling PFAA concentration

Table 4: Sensitivity analysis of the association between PFAAs and self-report memory impairment for a doubling PFAA concentration, by quintiles of PFAAs, and in ordinal regression on subjects aged 65 years and older (n=7,097), and using any memory impairment as outcome measure (n=21,024).

|                                | Range (ng/mL) | OR (95% C.I.) <sup>b</sup><br>N=7,097<br>Restricted to those<br>aged 65+* | Range (ng/mL) | OR (95% C.I.) <sup>b</sup><br>N=21,024<br>Any memory<br>impairment <sup>^</sup> |
|--------------------------------|---------------|---------------------------------------------------------------------------|---------------|---------------------------------------------------------------------------------|
| <b>PFOS</b>                    |               | 0.95 (0.90-1.00)                                                          |               | 0.96 (0.94-0.99)                                                                |
| <b>Ordinal regression</b>      |               | 0.98 (0.94-1.03)                                                          |               |                                                                                 |
| <b>1<sup>st</sup> quintile</b> | 0.25-15.3     | Ref.                                                                      | 0.25-14.4     | Ref.                                                                            |
| <b>2<sup>nd</sup> quintile</b> | 15.4-22.0     | 0.99 (0.83-1.20)                                                          | 14.5-20.4     | 0.96 (0.88-1.05)                                                                |
| <b>3<sup>rd</sup> quintile</b> | 22.1-28.9     | 0.95 (0.79-1.14)                                                          | 20.5-27.1     | 0.90 (0.82-0.98)                                                                |
| <b>4<sup>th</sup> quintile</b> | 29.0-4.0      | 0.97 (0.81-1.16)                                                          | 27.2-37.2     | 0.94 (0.86-1.03)                                                                |
| <b>5<sup>th</sup> quintile</b> | 40.1-759.2    | 0.84 (0.70-1.01)                                                          | 37.3-759.2    | 0.93 (0.85-1.02)                                                                |
| <b>Trend</b>                   |               | 0.079                                                                     |               | 0.121                                                                           |
| <b>PFOA</b>                    |               | 0.99 (0.97-1.03)                                                          |               | 0.97 (0.96-0.99)                                                                |
| <b>Ordinal regression</b>      |               | 1.00 (0.97-1.03)                                                          |               |                                                                                 |
| <b>1<sup>st</sup> quintile</b> | 0.25-15.0     | Ref.                                                                      | 0.25-14.0     | Ref.                                                                            |
| <b>2<sup>nd</sup> quintile</b> | 15.1-29.6     | 0.91 (0.75-1.09)                                                          | 14.1-27.0     | 0.90 (0.82-0.98)                                                                |
| <b>3<sup>rd</sup> quintile</b> | 29.7-56.8     | 0.90 (0.75-1.08)                                                          | 27.1-53.8     | 0.86 (0.79-0.94)                                                                |
| <b>4<sup>th</sup> quintile</b> | 56.9-123.0    | 0.84 (0.70-1.01)                                                          | 53.9-118.1    | 0.87 (0.79-0.95)                                                                |
| <b>5<sup>th</sup> quintile</b> | 123.1-5,994.8 | 0.99(0.83-1.19)                                                           | 118.3-22,412  | 0.85 (0.78-0.93)                                                                |
| <b>Tend</b>                    |               | 0.680                                                                     |               | <0.001                                                                          |
| <b>PFNA</b>                    |               | 0.95 (0.87-1.02)                                                          |               | 0.98 (0.95-1.02)                                                                |
| <b>Ordinal regression</b>      |               | 0.99 (0.93-1.07)                                                          |               |                                                                                 |
| <b>1<sup>st</sup> quintile</b> | 0.25-0.8      | Ref.                                                                      | 0.25-0.90     | Ref.                                                                            |
| <b>2<sup>nd</sup> quintile</b> | 0.9-1.1       | 0.88 (0.73-1.06)                                                          | 1.0-1.2       | 0.89 (0.82-0.97)                                                                |
| <b>3<sup>rd</sup> quintile</b> | 1.2-1.4       | 0.81 (0.67-0.98)                                                          | 1.3-1.4       | 0.94(0.85-1.04)                                                                 |
| <b>4<sup>th</sup> quintile</b> | 1.5-1.8       | 0.82 (0.68-0.99)                                                          | 1.5-1.9       | 0.92 (0.85-1.01)                                                                |
| <b>5<sup>th</sup> quintile</b> | 1.9-11.7      | 0.88 (0.73-1.07)                                                          | 2.0-28.6      | 0.94 (0.86-1.03)                                                                |
| <b>Trend</b>                   |               | 0.177                                                                     |               | 0.493                                                                           |
| <b>PFHxS</b>                   |               | 0.96 (0.91-1.01)                                                          |               | 0.97 (0.94-0.99)                                                                |
| <b>Ordinal regression</b>      |               | 0.98 (0.93-1.02)                                                          |               |                                                                                 |
| <b>1<sup>st</sup> quintile</b> | 0.25-1.9      | Ref.                                                                      | 0.25-1.7      | Ref.                                                                            |
| <b>2<sup>nd</sup> quintile</b> | 2.0-2.8       | 0.98 (0.82-1.18)                                                          | 1.8-2.6       | 0.98 (0.90-1.07)                                                                |
| <b>3<sup>rd</sup> quintile</b> | 2.9-3.9       | 0.95 (0.79-1.15)                                                          | 2.7-3.6       | 1.03 (0.94-1.13)                                                                |
| <b>4<sup>th</sup> quintile</b> | 4.0-6.0       | 0.98 (0.82-1.17)                                                          | 3.7-5.6       | 0.96 (0.87-1.04)                                                                |
| <b>5<sup>th</sup> quintile</b> | 6.1-232.6     | 0.86 (0.71-1.03)                                                          | 5.7-232.6     | 0.89 (0.81-0.97)                                                                |
| <b>Trend</b>                   |               | 0.139                                                                     |               | 0.010                                                                           |

<sup>b</sup>Model 2 includes age (one-year age bands), ethnicity, gender, and school level (categorical), household income (categorical), physical activity, alcohol consumption (categorical, none/<1drink/month, < 1 drink/week, few drinks/week, 1-3 drinks/day, >3 drinks/day, undetermined), and cigarette smoking (categorical, never, former, < 10 cig/day, 12-20 cig/day, 20+ cig/day)

\* Sensitivity analysis including subjects aged 65 years or older only (N=7,097)

<sup>^</sup> Sensitivity analysis using a more restrictive definition of memory impairment (those reporting frequent episode of short-term memory loss only, cases = 1,115)

1  
2  
3  
4  
5  
6  
7  
8  
9  
10  
11  
12  
13  
14  
15  
16  
17  
18  
19  
20  
21  
22  
23  
24  
25  
26  
27  
28  
29  
30  
31  
32  
33  
34  
35  
36  
37  
38  
39  
40  
41  
42  
43  
44  
45  
46  
47  
48  
49  
50  
51  
52  
53  
54  
55  
56  
57  
58  
59  
60



Figure 1: Prevalence of self-reported short-term memory impairment by age and sex in the study population  
203x162mm (96 x 96 DPI)

Online Table 1: The association between PFAAs and self-reported memory impairment in logistic regression for a doubling PFAA concentration, by quintiles of PFAAs, and in ordinal regression (n=21,024).

|                                | Range<br>(ng/mL) | Model 1 <sup>a</sup> | Model 2 <sup>b</sup> | Model 3 <sup>c</sup> |
|--------------------------------|------------------|----------------------|----------------------|----------------------|
| <b>PFOS</b>                    |                  | 0.92 (0.89-0.95)     | 0.93 (0.90-0.96)     | 0.93 (0.90-0.96)     |
| <b>Ordinal regression</b>      |                  | 0.95 (0.92-0.97)     | 0.95 (0.93-0.98)     | 0.96 (0.93-0.98)     |
| <b>1<sup>st</sup> quintile</b> | 0.25-14.4        | Ref.                 | Ref.                 | Ref.                 |
| <b>2<sup>nd</sup> quintile</b> | 14.5-20.4        | 0.95 (0.85-1.05)     | 0.96 (0.87-1.07)     | 0.97 (0.88-1.08)     |
| <b>3<sup>rd</sup> quintile</b> | 20.5-27.1        | 0.84 (0.76-0.93)     | 0.86 (0.78-0.96)     | 0.87 (0.79-0.97)     |
| <b>4<sup>th</sup> quintile</b> | 27.2-37.2        | 0.83 (0.75-0.93)     | 0.87 (0.78-0.96)     | 0.88 (0.79-0.97)     |
| <b>5<sup>th</sup> quintile</b> | 37.3-759.2       | 0.81 (0.73-0.91)     | 0.85 (0.76-0.94)     | 0.86 (0.77-0.96)     |
| <b>Trend</b>                   |                  | <0.001               | <0.001               | 0.001                |
| <b>PFOA</b>                    |                  | 0.95 (0.94-0.97)     | 0.96 (0.94-0.98)     | 0.96 (0.94-0.98)     |
| <b>Ordinal regression</b>      |                  | 0.97 (0.95-0.98)     | 0.97 (0.96-0.98)     | 0.97 (0.96-0.99)     |
| <b>1<sup>st</sup> quintile</b> | 0.25-14.0        | Ref.                 | Ref.                 | Ref.                 |
| <b>2<sup>nd</sup> quintile</b> | 14.1-27.0        | 0.86 (0.78-0.96)     | 0.88 (0.79-0.97)     | 0.88 (0.80-0.98)     |
| <b>3<sup>rd</sup> quintile</b> | 27.1-53.8        | 0.82 (0.74-0.91)     | 0.83 (0.75-0.92)     | 0.84 (0.76-0.93)     |
| <b>4<sup>th</sup> quintile</b> | 53.9-118.1       | 0.77 (0.70-0.86)     | 0.79 (0.71-0.88)     | 0.81 (0.73-0.90)     |
| <b>5<sup>th</sup> quintile</b> | 118.3-22,412     | 0.76 (0.69-0.85)     | 0.79 (0.71-0.88)     | 0.80 (0.72-0.90)     |
| <b>Tend</b>                    |                  | <0.001               | <0.001               | <0.001               |
| <b>PFNA</b>                    |                  | 0.94 (0.90-0.98)     | 0.96 (0.91-1.00)     | 0.96 (0.92-1.01)     |
| <b>Ordinal regression</b>      |                  | 0.96 (0.93-0.99)     | 0.97 (0.94-1.01)     | 0.98 (0.94-1.01)     |
| <b>1<sup>st</sup> quintile</b> | 0.25-0.90        | Ref.                 | Ref.                 | Ref.                 |
| <b>2<sup>nd</sup> quintile</b> | 1.0-1.2          | 0.85 (0.77-0.94)     | 0.86 (0.78-0.96)     | 0.87 (0.78-0.96)     |
| <b>3<sup>rd</sup> quintile</b> | 1.3-1.4          | 0.85 (0.76-0.95)     | 0.87 (0.77-0.98)     | 0.88 (0.78-0.98)     |
| <b>4<sup>th</sup> quintile</b> | 1.5-1.9          | 0.83 (0.75-0.92)     | 0.86 (0.77-0.95)     | 0.86 (0.78-0.95)     |
| <b>5<sup>th</sup> quintile</b> | 2.0-28.6         | 0.85 (0.76-0.94)     | 0.89 (0.80-0.99)     | 0.90 (0.81-1.01)     |
| <b>Trend</b>                   |                  | 0.004                | 0.053                | 0.079                |
| <b>PFHxS</b>                   |                  | 0.95 (0.92-0.98)     | 0.96 (0.93-0.99)     | 0.97 (0.94-1.00)     |
| <b>Ordinal regression</b>      |                  | 0.96 (0.94-0.99)     | 0.97 (0.94-0.99)     | 0.97 (0.95-0.99)     |
| <b>1<sup>st</sup> quintile</b> | 0.25-1.7         | Ref.                 | Ref.                 | Ref.                 |
| <b>2<sup>nd</sup> quintile</b> | 1.8-2.6          | 1.00 (0.90-1.11)     | 1.01 (0.91-1.12)     | 1.02 (0.91-1.13)     |
| <b>3<sup>rd</sup> quintile</b> | 2.7-3.6          | 1.00 (0.90-1.11)     | 1.02 (0.91-1.13)     | 1.03 (0.93-1.15)     |
| <b>4<sup>th</sup> quintile</b> | 3.7-5.6          | 0.91 (0.82-1.02)     | 0.93 (0.84-1.04)     | 0.96 (0.86-1.06)     |
| <b>5<sup>th</sup> quintile</b> | 5.7-232.6        | 0.86 (0.77-0.96)     | 0.89(0.79-0.99)      | 0.92 (0.82-1.02)     |
| <b>Trend</b>                   |                  | 0.001                | 0.009                | 0.053                |

Online Table 2: The association between PFAAs and self-report memory impairment for a doubling PFAA concentration and by tertiles of distribution by self-reported anti-diabetic treatment

|                               | Range (ng/ML) | N     | PFOS<br>OR (95% CI)* | Range (ng/ML) | PFOA<br>OR (95% CI)* | Range (ng/ML) | PFNA<br>OR (95% CI)* | Range (ng/ML) | PFHxS<br>OR (95% CI)* |
|-------------------------------|---------------|-------|----------------------|---------------|----------------------|---------------|----------------------|---------------|-----------------------|
| <b>Thiazolidinedione use</b>  |               | 809   | 1.00 (0.86-1.16)     |               | 0.97 (0.88-1.07)     |               | 0.94 (0.74-1.19)     |               | 1.02 (0.87-1.20)      |
| <b>Ordinal regression</b>     |               |       | 1.06 (0.93-1.20)     |               | 1.03 (0.95-1.11)     |               | 1.02 (0.84-1.25)     |               | 1.05 (0.92-1.20)      |
| <b>1<sup>st</sup> tertile</b> | 0.25-17.9     |       | Ref.                 | 1.1-17.5      | Ref.                 | 0.25-1.0      | Ref.                 | 0.25-1.9      | Ref.                  |
| <b>2<sup>nd</sup> tertile</b> | 18.0-29.9     |       | 0.76 (0.50-1.16)     | 17.6-49.7     | 0.72 (0.47-1.10)     | 1.1-1.5       | 0.83 (0.54-1.26)     | 2.0-3.5       | 1.56 (1.02-2.38)      |
| <b>3<sup>rd</sup> tertile</b> | 30.1-104.9    |       | 0.93 (0.61-1.42)     | 19.9-8,068    | 0.81 (0.53-1.24)     | 1.6-14.7      | 0.79 (0.51-1.23)     | 3.6-84.0      | 1.13 (0.72-1.77)      |
| <b>p-value for trend</b>      |               |       | 0.737                |               | 0.333                |               | 0.309                |               | 0.628                 |
| <b>Other medications</b>      |               | 1,244 | 0.90 (0.80-1.01)     |               | 1.00 (0.93-1.07)     |               | 0.95 (0.79-1.15)     |               | 0.91 (0.81-1.03)      |
| <b>Ordinal regression</b>     |               |       | 0.92 (0.83-1.01)     |               | 1.00 (0.93-1.07)     |               | 0.94 (0.81-1.10)     |               | 0.94 (0.86-1.04)      |
| <b>1<sup>st</sup> tertile</b> | 0.25-17.9     |       | Ref.                 | 0.25-20.5     | Ref.                 | 0.25-1.1      | Ref.                 | 0.25-2.1      | Ref.                  |
| <b>2<sup>nd</sup> tertile</b> | 18.0-29.8     |       | 0.75 (0.54-1.04)     | 20.6-63.2     | 0.99 (0.71-1.39)     | 1.2-1.6       | 0.72 (0.52-1.01)     | 2.2-3.6       | 0.99 (0.71-1.38)      |
| <b>3<sup>rd</sup> tertile</b> | 29.9-218.0    |       | 0.68 (0.48-0.95)     | 63.4-2,316.2  | 0.92 (0.66-1.29)     | 1.7-6.0       | 0.85 (0.61-1.20)     | 3.7-99.7      | 0.82 (0.58-1.16)      |
| <b>p-value for trend</b>      |               |       | 0.023                |               | 0.644                |               | 0.341                |               | 0.259                 |
| <b>No medication</b>          |               | 1,390 | 0.95 (0.85-1.07)     |               | 1.00 (0.94-1.08)     |               | 1.03 (0.87-1.23)     |               | 1.01 (0.90-1.13)      |
| <b>Ordinal regression</b>     |               |       | 0.94 (0.86-1.03)     |               | 1.00 (0.95-1.06)     |               | 0.98 (0.85-1.13)     |               | 0.99 (0.90-1.08)      |
| <b>1<sup>st</sup> tertile</b> | 0.25-18.3     |       | Ref.                 | 0.7-20.2      | Ref.                 | 0.25-1.0      | Ref.                 | 0.25-2.1      | Ref.                  |
| <b>2<sup>nd</sup> tertile</b> | 18.4-29.3     |       | 1.11 (0.81-1.52)     | 20.3-63.4     | 1.05 (0.77-1.44)     | 1.1-1.5       | 1.01 (0.72-1.40)     | 2.2-3.7       | 0.93 (0.68-1.28)      |
| <b>3<sup>rd</sup> tertile</b> | 29.4-272.0    |       | 1.02 (0.74-1.40)     | 63.5-22,412   | 0.99 (0.72-1.37)     | 1.6-14.5      | 1.12 (0.81-1.54)     | 3.8-43.3      | 0.99 (0.72-1.37)      |
| <b>p-value for trend</b>      |               |       | 0.897                |               | 0.984                |               | 0.473                |               | 0.957                 |

\*using clinical record validated diagnosis of diabetes and self-reported use of medications, adjusted for age (one-year age bands), ethnicity, gender, school level (categorical), household income (categorical), physical activity, alcohol consumption (categorical, none/<1drink/month, < 1 drink/week, few drinks/week, 1-3 drinks/day, >3 drinks/day, undetermined), and cigarette smoking (categorical, never, former, < 10 cig/day, 12-20 cig/day, 20+ cig/day); † OR for doubling PFAA concentration

Table S1

(Gallo et al. [2011] PLoS Med; doi:10.1371/journal.pmed.1001117)

| The Strengthening the Reporting Observational studies in Epidemiology – Molecular Epidemiology (STROBE-ME) Reporting Recommendations: Extended from STROBE statement |             |                                                                                                                                                                                                                                                                                                                                                                                                                                                                                                                                                                                                                                                                                 |                                                                                                                                                                                                                                      |
|----------------------------------------------------------------------------------------------------------------------------------------------------------------------|-------------|---------------------------------------------------------------------------------------------------------------------------------------------------------------------------------------------------------------------------------------------------------------------------------------------------------------------------------------------------------------------------------------------------------------------------------------------------------------------------------------------------------------------------------------------------------------------------------------------------------------------------------------------------------------------------------|--------------------------------------------------------------------------------------------------------------------------------------------------------------------------------------------------------------------------------------|
| Item                                                                                                                                                                 | Item number | STROBE Guidelines                                                                                                                                                                                                                                                                                                                                                                                                                                                                                                                                                                                                                                                               | Extension for Molecular Epidemiology Studies (STROBE-ME)                                                                                                                                                                             |
| <b>Title and abstract</b>                                                                                                                                            | <b>1</b>    | <p>(a) Indicate the study's design with a commonly used term in the title or the abstract</p> <p>(b) Provide in the abstract an informative and balanced summary of what was done and what was found</p>                                                                                                                                                                                                                                                                                                                                                                                                                                                                        | <b>ME-1</b> State the use of specific biomarker(s) in the title and/or in the abstract if they contribute substantially to the findings                                                                                              |
| <b>Introduction</b>                                                                                                                                                  |             |                                                                                                                                                                                                                                                                                                                                                                                                                                                                                                                                                                                                                                                                                 |                                                                                                                                                                                                                                      |
| Background rationale                                                                                                                                                 | <b>2</b>    | Explain the scientific background and rationale for the investigation being reported                                                                                                                                                                                                                                                                                                                                                                                                                                                                                                                                                                                            | <b>ME-2</b> Explain in the scientific background of the study how/why the specific biomarker(s) have been chosen, potentially among many others (e.g., others are studied but reported elsewhere, or not studied at all)             |
| Objectives                                                                                                                                                           | <b>3</b>    | State specific objectives, including any pre-specified hypotheses                                                                                                                                                                                                                                                                                                                                                                                                                                                                                                                                                                                                               | <b>ME-3</b> <i>A priori</i> hypothesis: if one or more biomarkers are used as proxy measures, state the <i>a priori</i> hypothesis on the expected values of the biomarker(s)                                                        |
| <b>Methods</b>                                                                                                                                                       |             |                                                                                                                                                                                                                                                                                                                                                                                                                                                                                                                                                                                                                                                                                 |                                                                                                                                                                                                                                      |
| Study design                                                                                                                                                         | <b>4</b>    | Present key elements of study design early in the paper                                                                                                                                                                                                                                                                                                                                                                                                                                                                                                                                                                                                                         | <b>ME-4</b> Describe the special study designs for molecular epidemiology (in particular nested case/control and case/cohort) and how they were implemented                                                                          |
| <i>Biological sample collection</i>                                                                                                                                  |             |                                                                                                                                                                                                                                                                                                                                                                                                                                                                                                                                                                                                                                                                                 | <b>ME-4.1</b> Report on the setting of the biological sample collection; amount of sample; nature of collecting procedures; participant conditions; time between sample collection and relevant clinical or physiological endpoints. |
| <i>Biological sample storage</i>                                                                                                                                     |             |                                                                                                                                                                                                                                                                                                                                                                                                                                                                                                                                                                                                                                                                                 | <b>ME-4.2</b> Describe sample processing (centrifugation, timing, additives, etc).                                                                                                                                                   |
| <i>Biological sample processing</i>                                                                                                                                  |             |                                                                                                                                                                                                                                                                                                                                                                                                                                                                                                                                                                                                                                                                                 | <b>ME-4.3</b> Describe sample storage until biomarker analysis (storage, thawing, manipulation, etc).                                                                                                                                |
| <i>Biomarker biochemical characteristics</i>                                                                                                                         |             |                                                                                                                                                                                                                                                                                                                                                                                                                                                                                                                                                                                                                                                                                 | <b>ME-4.4</b> Report the half-life of the biomarker, and chemical and physical characteristics (e.g., solubility).                                                                                                                   |
| Setting                                                                                                                                                              | <b>5</b>    | Describe the setting, locations, and relevant dates, including periods of recruitment, exposure, follow-up, and data collection                                                                                                                                                                                                                                                                                                                                                                                                                                                                                                                                                 |                                                                                                                                                                                                                                      |
| Participants                                                                                                                                                         | <b>6</b>    | <p>(a) Cohort study—Give the eligibility criteria, and the sources and methods of selection of participants. Describe methods of follow-up</p> <p>Case-control study—Give the eligibility criteria, and the sources and methods of case ascertainment and control selection. Give the rationale for the choice of cases and controls</p> <p>Cross-sectional study—Give the eligibility criteria, and the sources and methods of selection of participants</p> <p>(b) Cohort study—For matched studies, give matching criteria and number of exposed and unexposed</p> <p>Case-control study—For matched studies, give matching criteria and the number of controls per case</p> | <b>ME-6</b> Report any habit, clinical conditions, physiological factor, or working or living condition that might affect the characteristics or concentrations of the biomarker                                                     |
| Variables                                                                                                                                                            | <b>7</b>    | Clearly define all outcomes, exposures, predictors, potential confounders, and effect modifiers. Give diagnostic criteria, if applicable                                                                                                                                                                                                                                                                                                                                                                                                                                                                                                                                        |                                                                                                                                                                                                                                      |
| Data source/measurement                                                                                                                                              | <b>8</b>    | For each variable of interest, give sources of data and details of methods of assessment (measurement). Describe comparability of assessment methods if there is more than one group                                                                                                                                                                                                                                                                                                                                                                                                                                                                                            | <b>ME-8</b> Laboratory methods: report type of assay used, detection limit, quantity of biological sample used, outliers, timing in the assay procedures (when applicable) and calibration procedures or any standard used           |
| Bias                                                                                                                                                                 | <b>9</b>    | Describe any efforts to address potential sources of bias                                                                                                                                                                                                                                                                                                                                                                                                                                                                                                                                                                                                                       |                                                                                                                                                                                                                                      |
| Study size                                                                                                                                                           | <b>10</b>   | Explain how the study size was arrived at                                                                                                                                                                                                                                                                                                                                                                                                                                                                                                                                                                                                                                       |                                                                                                                                                                                                                                      |
| Quantitative variables                                                                                                                                               | <b>11</b>   | Explain how quantitative variables were handled in the analyses. If applicable, describe which groupings were chosen, and why                                                                                                                                                                                                                                                                                                                                                                                                                                                                                                                                                   |                                                                                                                                                                                                                                      |
| Statistical methods                                                                                                                                                  | <b>12</b>   | <p>(a) Describe all statistical methods, including those used to control for confounding</p> <p>(b) Describe any methods used to examine subgroups and interactions</p> <p>(c) Explain how missing data were addressed</p> <p>(d) Cohort study—If applicable, explain how loss to follow-up was addressed</p> <p>Case-control study—If applicable, explain how matching of cases and controls was addressed</p> <p>Cross-sectional study—If applicable, describe analytical methods taking account of sampling strategy</p> <p>(e) Describe any sensitivity analyses</p>                                                                                                        | <b>ME-12</b> Describe how biomarkers were introduced into statistical models                                                                                                                                                         |

|                                                                      |           |                                                                                                                                                                                                                                                                                                                                                                                                                 |                                                                                                                                                                                |
|----------------------------------------------------------------------|-----------|-----------------------------------------------------------------------------------------------------------------------------------------------------------------------------------------------------------------------------------------------------------------------------------------------------------------------------------------------------------------------------------------------------------------|--------------------------------------------------------------------------------------------------------------------------------------------------------------------------------|
| Validity/reliability of measurement and internal/external validation |           |                                                                                                                                                                                                                                                                                                                                                                                                                 | <b>ME-12.1</b> Report on the validity and reliability of measurement of the biomarker(s) coming from the literature and any internal or external validation used in the study. |
| <b>Results</b>                                                       |           |                                                                                                                                                                                                                                                                                                                                                                                                                 |                                                                                                                                                                                |
| Participants                                                         | <b>13</b> | (a) Report the numbers of individuals at each stage of the study—e.g., numbers potentially eligible, examined for eligibility, confirmed eligible, included in the study, completing follow-up, and analysed<br>(b) Give reasons for non-participation at each stage<br>(c) Consider use of a flow diagram                                                                                                      | <b>ME-13</b> Give reason for loss of biological samples at each stage                                                                                                          |
| Descriptive data                                                     | <b>14</b> | (a) Give characteristics of study participants (e.g., demographic, clinical, social) and information on exposures and potential confounders<br>(b) Indicate the number of participants with missing data for each variable of interest<br>(c) Cohort study—Summarise follow-up time (e.g., average and total amount)                                                                                            |                                                                                                                                                                                |
| Distribution of biomarker measurement                                |           |                                                                                                                                                                                                                                                                                                                                                                                                                 | <b>ME-14.1</b> Give the distribution of the biomarker measurement (including mean, median, range, and variance)                                                                |
| Outcome data                                                         | <b>15</b> | Cohort study—Report numbers of outcome events or summary measures over time<br>Case-control study—Report numbers in each exposure category, or summary measures of exposure<br>Cross-sectional study—Report numbers of outcome events or summary measures                                                                                                                                                       |                                                                                                                                                                                |
| Main results                                                         | <b>16</b> | (a) Give unadjusted estimates and, if applicable, confounder-adjusted estimates and their precision (e.g., 95% confidence interval). Make clear which confounders were adjusted for and why they were included<br>(b) Report category boundaries when continuous variables were categorized<br>(c) If relevant, consider translating estimates of relative risk into absolute risk for a meaningful time period |                                                                                                                                                                                |
| Other analyses                                                       | <b>17</b> | Report other analyses done—e.g., analyses of subgroups and interactions, and sensitivity analyses                                                                                                                                                                                                                                                                                                               |                                                                                                                                                                                |
| <b>Discussion</b>                                                    |           |                                                                                                                                                                                                                                                                                                                                                                                                                 |                                                                                                                                                                                |
| Key results                                                          | <b>18</b> | Summarise key results with reference to study objectives                                                                                                                                                                                                                                                                                                                                                        |                                                                                                                                                                                |
| Limitations                                                          | <b>19</b> | Discuss limitations of the study, taking into account sources of potential bias or imprecision. Discuss both direction and magnitude of any potential bias                                                                                                                                                                                                                                                      | <b>ME-19</b> Describe main limitations in laboratory procedures                                                                                                                |
| Interpretation                                                       | <b>20</b> | Give a cautious overall interpretation of results considering objectives, limitations, multiplicity of analyses, results from similar studies, and other relevant evidence                                                                                                                                                                                                                                      | <b>ME-20</b> Give an interpretation of results in terms of <i>a-priori</i> biological plausibility                                                                             |
| Generalisability                                                     | <b>21</b> | Discuss the generalisability (external validity) of the study results                                                                                                                                                                                                                                                                                                                                           |                                                                                                                                                                                |
| <b>Other information</b>                                             |           |                                                                                                                                                                                                                                                                                                                                                                                                                 |                                                                                                                                                                                |
| Funding                                                              | <b>22</b> | Give the source of funding and the role of the funders for the present study and, if applicable, for the original study on which the present article is based                                                                                                                                                                                                                                                   |                                                                                                                                                                                |
| Ethics                                                               |           |                                                                                                                                                                                                                                                                                                                                                                                                                 | <b>ME-22.1</b> Describe informed consent and approval from ethical committee(s). Specify whether samples were anonymous, anonymised or identifiable                            |



1  
2  
3 **Serum perfluoroalkyl acids concentrations and memory impairment in a large cross-sectional**  
4 **study**  
5

6 Valentina Gallo<sup>1,2</sup>, Giovanni Leonardi<sup>1</sup>, Carol Brayne<sup>3</sup>, Ben Armstrong<sup>1</sup>, Tony Fletcher<sup>1</sup>  
7  
8  
9

- 10  
11  
12  
13 1. Social and Environmental Health Research, London School of Hygiene and Tropical Medicine, London  
14 (UK)  
15 2. Centre for Primary Care and Public Health, Blizard Institute, Queen Mary, University of London,  
16 London (UK)  
17 3. University of Cambridge, Cambridge (UK)  
18  
19  
20  
21  
22

23 **Please send the correspondence to:**  
24

25 Dr Valentina Gallo, MD, MSc, PhD  
26 London School of Hygiene and Tropical Medicine  
27 Faculty of Public Health and Policy  
28 15-17 Tavistock place  
29 WC1H 9SH London  
30 Tel +44/(0)20/7927 2779  
31 Email: valentina.gallo@lshtm.ac.uk  
32  
33  
34  
35  
36  
37  
38  
39  
40

41 **Key words:** memory disorders [MeSH], prefluoroalkyl acids, perfluorooctanoic acid [MeSH], C8  
42 Health Panel Study  
43

44 **Running title:** perfluoroalkyl acids and memory impairment  
45

46 **Word count:** 3,24151  
47  
48  
49  
50  
51  
52  
53  
54  
55  
56  
57  
58  
59  
60

## Summary

### Article focus

- Cross-sectional association between serum level of Perfluorooctanate (PFOA), perfluorooctane sulfonate (PFOS), perfluorononanoic acid (PFNA) and perfluorohexane sulfonate (PFHxS) and self-reported memory impairment in a population exposed to high levels of PFOA
- Potential interaction between the association of perfluoroalkyl acids (PFAAs) with memory impairment by diabetes status

### Key Message

- Inverse associations between PFOS and PFOA and memory impairment were statistically significant perhaps due to a potential anti-inflammatory effect exerted through PPAR agonism. Comparable inverse associations with PFNA and PFHxS were of borderline statistical significance
- Inverse associations of PFAAs with memory impairment were weaker or non-existent in diabetics than overall in non-diabetics. Analysis further stratified by specific diabetes medication use showed no variation in odds ratios more than explicable by chance given the number of tests made.

### Strengths and limitations

- Very large sample size including 21,024 adults with measured serum level of Perfluoroalkyl acids (PFAAs) with a given geographical distribution allowing some multilevel modelling
- The cross-sectional nature of the design does not allow any causal inference and makes results particularly prone to reverse causality
- Self-reported is not an optimal method for estimating the degree of memory impairment in a population

**ABSTRACT**

**Objectives** – To examine the cross-sectional association between serum PFOA, PFOS, PFNA, and PFHxS concentrations with self-reported memory impairment in adults and the interaction of these associations with diabetes status

**Design** - Cross-sectional study

**Setting** – Population-based in Mid-Ohio Valley, West Virginia following contamination by a chemical plant

**Participants** - The C8 Health Project collected data and measured serum level of PFAAs of 21,024 adults aged 50+ years

**Primary outcome measure** – Self-reported memory impairment as defined by the question “have experienced short term memory loss?”

**Results** - A total of 4,057 subjects self-reported short-term memory impairment. Inverse associations between PFOS and PFOA and memory impairment were highly statistically significant with fully adjusted OR=0.93 (95% C.I. 0.90-0.96) for doubling PFOS and OR=0.96 (95% C.I. 0.94-0.98) for doubling PFOA concentrations. Comparable inverse associations with PFNA and PFHxS were of borderline statistical significance. Inverse associations of PFAAs with memory impairment were weaker or non-existent in diabetics than overall in non-diabetics.

**Conclusion** - An inverse association between PFAA serum levels and self-reported memory impairment has been observed in this large population-based, cross-sectional study stronger and more statistically significant for PFOA and PFOS. The associations can be potentially explained by preventive anti-inflammatory effect exerted by a PPAR agonist effect of these PFAAs, but confounding or even reverse causation cannot be excluded as an alternative explanation.

## INTRODUCTION

Perfluoroalkyl acids (PFAAs) are man-made compounds used during the manufacture of fluoropolymers including non-stick cookware and breathable, yet waterproof, fabrics. They can also result from the metabolism of fluorinated telomers, compounds used for food package coatings, carpet treatments, and stain-resistant fabric treatment. Perfluorooctanate (PFOA), perfluorooctane sulfonate (PFOS), perfluorononanoic acid (PFNA) and perfluorohexane sulfonate (PFHxS) persist in the environment and are found in the blood of humans and many animal species throughout the world<sup>1,2</sup>. Potential sources of exposure to PFAAs in humans include drinking water, dust, breast milk, fish and other foods, food packaging, ambient air, and occupational exposure<sup>3-6</sup>.

In animal models, perfluoroalkyl chemicals can activate peroxisome proliferator-activated receptor alpha (PPAR $\alpha$ ), a ligand-activated transcription factor that regulates gene expression, lipid modulation, glucose homeostasis, cell proliferation and inflammation<sup>7,8</sup>. The PPAR receptor has been involved in the ageing process: PPAR $\alpha$  null mice showed a decreased longevity compared with the wild-type due to non-neoplastic spontaneous ageing lesions which occurred with a higher incidence and a short latency in the PPAR $\alpha$  null mice<sup>9</sup>. Also PPAR $\gamma$  variants were reported to be associated with longevity in humans with low insulin resistance<sup>10,11</sup>. Activation of the PPAR $\gamma$  receptor *in vitro* and *in vivo* also prevents the expression of inflammatory cytokines and other inflammatory mediators in brains of Alzheimer disease animal models<sup>12,13</sup>. In addition, PPAR $\gamma$  agonists have been demonstrated to suppress the A $\beta$ -mediated activation of microglia *in vitro* and prevent cortical or hippocampal neuronal cell death<sup>14-16</sup>. PPAR $\gamma$  is also deeply involved in diabetes, given its ability to orchestrate the expression of genes involved in lipid metabolism, adipogenesis, and inflammation. It is activated by endogenous ligands (such as fatty acids and prostaglandins) or drugs such as thiazolidinedione. It is most highly expressed in adipocytes where it acts as the master regulator of adipogenesis via induction of adipogenic genes<sup>17</sup>. However, a study *in vitro* showed that PFOA and PFOS activate differentially PPAR $\alpha$  and PPAR $\gamma$  receptors, but it is not possible to directly extrapolate these results to toxicity studies *in vivo*<sup>18</sup>. Therefore, in line with what was recently observed by Power et al<sup>19</sup>, we hypothesised that increased exposure to PFAA could be associated with a better cognitive function.

The positive association between diabetes and cognitive impairment is well established<sup>20</sup>; some studies investigating the association between PFOA exposure and diabetes suggested the presence of an inverse association: a negative trend in diabetes occurrence by increasing serum PFOA deciles

1  
2  
3 was found in a case-control study nested in a previous study based on the population investigated  
4 here <sup>21 22</sup>; but not in others <sup>23 24</sup>.

5  
6  
7 From 1950-2005, a chemical plant in the Mid-Ohio Valley, West Virginia was responsible for emitting  
8 PFOA into the surrounding environment. In 2001, a group of residents from the nearby West Virginia  
9 and Ohio communities filed a class action lawsuit alleging health damage from drinking water  
10 supplies drawing on PFOA-contaminated groundwater <sup>25</sup>. Part of the pre-trial settlement of the class  
11 action lawsuit included a baseline survey, the C8 Health Project, conducted in 2005-2006, that  
12 gathered data from over 69,000 people from six contaminated water districts surrounding the plant  
13 <sup>25</sup>. In this population, PFOA concentrations ranged from US background levels to very high; overall  
14 PFOA levels are much higher in this population (geometric mean 42.6.0 ng/mL, 95% C.I. 41.8-43.3)  
15 than in the corresponding US population surveys (NHANES in same year mean 3.95 ng/mL, 95% C.I.  
16 3.65-4.27) <sup>1 25</sup>. The mean PFOS (geometric mean 22.4, 95% C.I. 22.2-22.6), PFNA (1.37, 95% C.I. 1.36-  
17 1.38), and PFHxS (3.18, 95% C.I. 3.15-3.22) closely resembled values from a nationally representative  
18 US sample from a similar time frame (mean PFOS 20.7, 95% C.I. 19.2-22.3; mean PFNA 0.97, 95% C.I.  
19 0.82-1.14; and PFHxS 1.93, 95% C.I. 1.73-2.16) <sup>1</sup>.

20  
21  
22 The present study uses these data to examine the cross-sectional association between serum PFOA,  
23 PFOS, PFNA, and PFHxS concentrations with self-reported memory impairment in adults, and its  
24 potential interaction with diabetes status.  
25  
26  
27  
28  
29  
30  
31  
32  
33  
34  
35  
36  
37  
38  
39  
40

## 41 **METHODS**

### 42 **The Study population**

43  
44 This study is one of the C8 Science Panel Studies and uses information from questionnaires and  
45 blood tests collected in the C8 Health Project, supplemented by further information on classification  
46 by water district developed in a companion C8 Science Panel Study.  
47  
48  
49  
50

51  
52 The C8 Health Project enrolled eligible subjects between August 2005 and August 2006. Individuals  
53 were eligible to participate in the C8 Health Project if they had consumed water for at least one year  
54 between 1950 and December 3, 2004 while living, working, or going to school in one of the following  
55 six water districts: Little Hocking Water Association of Ohio; City of Belpre, Ohio; Tupper Plains-  
56  
57  
58  
59  
60

1  
2  
3 Chester District of Ohio; Village of Pomeroy, Ohio; Lubeck Public Service District of West Virginia;  
4 Mason County Public Service District of West Virginia; or private water sources within  
5  
6 aforementioned districts and areas of documented PFOA contamination. Details of the study  
7  
8 enrolment process, including consenting procedures, have been described elsewhere<sup>25</sup>.  
9

10  
11 The C8 Health Project collected data on 69,030 people. The participation rate for the C8 Health  
12  
13 Project based on US census counts of residents in the affected water districts during Project  
14  
15 enrolment, have been estimated at around 80%<sup>25</sup>. In this population, the strongest predictor of  
16  
17 PFOA serum concentration was residence in one of the contaminated water districts<sup>26</sup>; serum levels  
18  
19 of other PFAAs do not show such geographic variation. Of the population, 21,724 older adults (aged  
20  
21  $\geq 50$  years) were considered for this analysis, and a total of 21,024 (96.8%) were included in the final  
22  
23 analysis after exclusion of subjects with missing data on ethnicity, education level, socio-economic  
24  
25 status, cigarette smoking, or BMI measurements.  
26

### 27 **Memory impairment definition**

28 During the survey (2005-2006), all participants were asked if they “had experienced short term  
29  
30 memory loss”, the possible answers being “frequently”, “sometimes”, “rarely”, and “never”. The  
31  
32 principle analyses assessed memory impairment defined as reporting short-term memory loss  
33  
34 frequently or sometimes, compared to rarely and never. Memory impairment ever was also  
35  
36 considered, defined as reporting any memory loss and compared to the never category.  
37

### 38 **Laboratory analysis**

39 Blood samples were obtained and processed at individual data collection sites. Samples were drawn  
40  
41 into four tubes per participant, with a maximum 35 mL. Tubes were spun, aliquoted, and  
42  
43 refrigerated until shipping. Samples were shipped on dry ice daily from each data collection site to  
44  
45 the laboratory daily<sup>25</sup>. Participants were not asked to fast before blood sample withdrawal, but  
46  
47 fasting status was recorded.

48 Laboratory analysis of PFAAs used an automated solid-phase extraction combined with reverse-  
49  
50 phase high-performance liquid chromatography<sup>27</sup>. Analyses were conducted by the Exygen Research  
51  
52 Inc., State College, PA, USA; an intra-laboratory quality assurance program was carried out by  
53  
54 analysis of duplicate samples at AXYS Analytical Service Ltd., Sidney, BC, Canada<sup>25</sup>. The intra-  
55  
56 laboratory coefficient of variation for all PFAAs measurements was 0.1; the inter-laboratory  
57  
58 comparison coefficient of variation was 0.2 for PFOA and PFNA, 0.1 for PFOS, and not applicable for  
59  
60 PFHxA as all in the second lab measurement values were below level of detection<sup>25</sup>. The detection

1  
2  
3 limit for all PFAAs was 0.5 ng/mL and observations below this limit were assigned a value of 0.25  
4 ng/mL ( $n=16$ ,  $n=101$ ,  $n=532$ , and  $n=387$  for PFOA, PFOS, PFNA, and PFHxS, respectively, for this study  
5 population). All PFAAs concentration distributions were skewed to the right. Methods and results  
6 are reported according to STROBE-ME recommendations<sup>28</sup>.  
7  
8  
9

### 10 11 **Statistical analysis**

12 Associations between exposure (serum concentration of PFOA, PFOS, PFNA, and PFHxS) and memory  
13 impairment were studied using logistic regression. Minimally adjusted models included age, in one  
14 year age-band, race (white, black, and others), gender, and educational level (high school diploma or  
15 general educational development (GED), some college, bachelor degree or higher) (Model 1).  
16 Further adjusted models additionally included average household income ( $\leq \$10,000$ ,  $\$10,001-$   
17  $20,000$ ,  $\$20,001-30,000$ ,  $\$30,001-40,000$ ,  $\$40,001-50,000$ ,  $\$50,001-60,000$ ,  $\$60,001-70,000$ ,  
18  $> \$70,000$ ), physical activity, alcohol consumption (none,  $<1$  drink/month,  $<1$  drink/week, few  
19 drinks/week,  $>1$  drink/day) and cigarette smoking (never smoker, former smoker, current smoker  
20  $<10$  cigarettes/day, current smoker 10-19 cigarettes/day, current smoker  $\geq 20$  cigarettes/day) (Model  
21 2). Fully adjusted models included also body mass index (BMI) (underweight/normal weight;  
22 overweight; and obese class I, II, and III), and diabetes (Model 3). PFAA concentrations were log-  
23 transformed to reduce skewness. For each model the association between PFAAs and self-reported  
24 memory impairment was calculated for a doubling in PFAA concentration in a model with PFAA  
25 entered as continuous covariate, for quintile groups of the PFAA distribution, and by ordinal  
26 regression analysis with the outcome variable comprising the four original levels of self-reported  
27 frequency of episodes of memory loss, again in relation to a doubling of PFAAs. To explore possible  
28 differential effect of PFAA in sub-groups, analyses were further stratified by diabetes status and,  
29 among diabetics, by type of medications.  
30  
31  
32  
33  
34  
35  
36  
37  
38  
39  
40  
41  
42

43 The following four sensitivity analyses were carried out: firstly one analysis restricting the sample to  
44 7,097 subjects aged 65 years and older. Secondly, an analysis conducted on the entire sample, but  
45 using as outcome definition those reporting any memory loss (frequently, sometimes, and rarely).  
46 Our final sensitivity analysis utilises the geographical clustering of PFOA exposure by water districts  
47 which allowed use to decompose the overall estimate of association of PFOA with memory  
48 impairment into within and between water district components, by including as explanatory  
49 variables both water district mean logged PFOA serum concentration and the deviations of  
50 individual's values from their district mean<sup>29</sup>. These two associations are subject to different  
51 potential biases, so help interpretation.  
52  
53  
54  
55  
56  
57  
58  
59  
60

### Role of funding

Funding for this work, the “C8 Science Panel Community Study at London School of Hygiene and Tropical Medicine - LSHTM”, comes from the C8 Class Action Settlement Agreement (Circuit Court of Wood County, WV, USA) between DuPont and plaintiffs, which resulted from releases of PFOA (or C8) into drinking water. It is one of the C8 Science Panel Studies undertaken by the Court-approved C8 Science Panel established under the same Settlement Agreement. The task of the C8 Science Panel, of which Tony Fletcher is a member, is to undertake research in the Mid-Ohio Valley, and subsequently evaluate the results along with other available information to determine if there are any probable links between PFOA and disease. Funds were administered by the Garden City Group (Melville, NY) that reports to the Court. The authors of this manuscript declare that their ability to design, conduct, interpret, or publish research was unimpeded by and fully independent of the court and/or settling parties. In addition, they declare no competing financial interests. The LSHTM Ethics Committee approved this study.

### RESULTS

A total of 4,462 subjects (21.2% of the entire population of 21,024 individuals aged 50 years or older) self-reported short-term memory impairment (**Error! Reference source not found.**): episodes of short-term memory loss were reported frequently by 1,115 subjects (5.3%); sometimes by 3,347 (15.9%); rarely by 4,283 (20.4%) and never by 12,279 (58.4%). Many personal characteristics were associated individually with memory loss, including higher age, lower socio-economic status, smoking, and diagnosis of diabetes (Table 1), though to what extent these reflected independent risk factors was not investigated.

Results from the logistic regression of association between PFAAs and memory impairment are shown in Table 2. Results for minimally, further and fully adjusted models were similar, so we show only further adjusted results in this table, but results for all models are in the on-line Table 1. Inverse associations between PFOS and PFOA and memory impairment were highly statistically significant with adjusted OR=0.93 (0.90-0.96) for PFOS and OR=0.96 (0.94-0.98) for PFOA for doubling PFAA concentrations. Inverse associations of similar magnitude with PFNA and PFHxS but of borderline statistical significance were found: OR=0.96 (0.92-1.02) for PFNA and OR=0.97 (0.94-1.00) for PFHxS. The analysis by PFAA quintile groups shows similar patterns.



1  
2  
3 Inverse associations of PFAAs with memory impairment were weaker or non-existent in diabetics  
4 than for non-diabetics (Table 3), though odds ratios were imprecise, and the difference by diabetes  
5 status was only significant for PFOA (p-value for interaction = 0.014). Analysis further stratified by  
6 specific diabetes medication use showed no variation in odds ratios more than explicable by chance  
7 given the number of tests made (on-line Table 2).  
8  
9

10  
11 In the sensitivity analysis on subjects older than 65 years, the substantial reduction of the sample  
12 size resulted in loss of precision in odds ratios. However, the points estimates of associations with  
13 memory impairment were of comparable magnitude for all PFAAs except PFOA for which the  
14 association with memory impairment was close to null (OR= 0.99 (0.97-1.03)) (Table 4).  
15  
16

17  
18 The analysis carried out on the entire sample, comparing those with any memory impairment  
19 against those with no memory problems shows slightly weaker associations for each PFAAs but  
20 precision was reduced (Table 4). Analyses using ordinal regression in place of binary logistic  
21 regression yielded similar results to the logistic regressions (Table 2, Table 3, and Table 4).  
22  
23

24  
25 The analysis separating the PFOA-memory impairment association into within and between water  
26 district components found that within water districts there was an inverse association between  
27 PFOA and memory impairment, as in the overall association (OR 0.94, 95%CI 0.91-0.98, scale and  
28 adjustments as before). However there was no association between geometric mean concentration  
29 by and memory impairment (OR 1.00, 95%CI 0.97-1.03, per doubling in geometric mean PFOA by  
30 district).  
31  
32

33  
34 Extra data is available upon request by emailing Tony Fletcher (tony.fletcher@lshtm.ac.uk).  
35  
36  
37  
38  
39  
40  
41  
42  
43

#### 44 **DISCUSSION**

45  
46 An inverse association between PFAAs serum levels (including PFOS, PFOA, PNA, and PFHxS) and  
47 self-reported memory impairment has been observed in this large population-based, cross-sectional  
48 study. This association is more clearly monotonic with increasing exposure, and more statistically  
49 significant for PFOA and PFOS. However, the consistent decrement for all PFAAs suggests a common  
50 mechanism.  
51  
52

53  
54 It is plausible that PFAAs could have an effect on cognitive function via PPAR agonism. Although it is  
55 not clear to what extent PFAAs act differentially on PPAR receptors  $\alpha$  and  $\gamma$ <sup>18</sup>, it could be speculated  
56  
57  
58  
59  
60

1  
2  
3 that this association might be mediated by the activation of the PPAR receptor by PFAAs. Activation  
4 of the PPAR $\gamma$  receptors has been shown to decrease the secretion of proinflammatory cytokines and  
5 possibly increase phagocytosis of A $\beta$  inclusions, probably through activation of microglia<sup>30</sup>. However  
6 there was suggestion that this effect of suppression of the activation of microglia was age-  
7 dependent or disease stage-dependent being not significant in patients with advanced Alzheimer's  
8 disease (AD)<sup>31 32</sup>. PPAR agonist drugs, such as non-steroidal anti-inflammatory drugs (NSAID) and  
9 some anti-diabetics (i.e. thiazolidinedione or pioglitazone) have been proposed as preventive drugs  
10 for neurodegenerative conditions, including Alzheimer's dementia<sup>30 33</sup>.

11  
12  
13  
14  
15  
16  
17 In a previous published study an inverse association between PFAAs and memory impairment was  
18 observed specifically among non-medicated diabetics<sup>19</sup>. In the present study, this pattern was not  
19 replicated, with the inverse association between PFAAs and cognitive impairment being more  
20 evident in those without diabetes; among diabetics, the association was not present, irrespective of  
21 treatment status. This finding could be explained by the fact that in diabetics PPAR receptors are  
22 more phosphorylated with a consequent reduced transcriptional activity<sup>34 35</sup>, and the balance  
23 between PPAR $\gamma$  expression and activity levels is altered<sup>34 36</sup>. It is therefore possible – based on the  
24 present data – that the PPAR-agonist effect of PFAAs is different in subjects with and without PPAR-  
25 mediated metabolic changes such as diabetes. Also, it has been reported that PFAAs have a PPAR  
26 agonist effect, more prominently PPAR- $\alpha$ <sup>37</sup>; animal models suggest that PFOA has a stronger  
27 agonistic effect than PFOS<sup>37</sup>. Our findings of an inverse association between PFAA and memory  
28 impairment among non-diabetics, would therefore be compatible with a possible anti-inflammatory  
29 role exerted by PFAA on early symptoms of cognitive impairment.

30  
31  
32  
33  
34  
35  
36  
37  
38  
39  
40  
41  
42  
43  
44  
45  
46  
47  
48  
49  
50  
51  
52  
53  
54  
55  
56  
57  
58  
59  
60  
There is some evidence of detrimental effects of PFAAs in neurodevelopment of mice affecting the  
cholinergic system and cognitive function<sup>38-40</sup>, thus timing of exposure may also be relevant in order  
for the PFAAs to exert this hypothesised anti-dementing role. However, these findings should be  
interpreted cautiously given the limitations of the study. Firstly, given the cross-sectional nature of  
the study, reverse causality must be considered: subjects suffering from memory impairment could  
have consumed less of these compounds via water and food sources, though this is not a likely  
explanation given the consistency of the association across various PFAAs which have substantially  
different routes of exposure. Host characteristics such as genotype could be correlated with both  
some mechanism predisposing these symptoms and variation in PFAA excretion rates, thus leading  
to a confounded association with serum levels. Further, self-report is not a very accurate method for  
ascertaining memory impairment, although errors in classification would be expected to be non-  
differential misclassification, biasing the estimate of association towards the null. The effects of

1  
2  
3 PFAA have been mostly studied in relation to PPAR $\alpha$ <sup>7</sup>, while the receptor mostly implicated in  
4 metabolic changes and diabetes and in dementia PPAR $\gamma$ <sup>30</sup>; however, these two belong to the same  
5 receptor family and some degree of cross-activation cannot be excluded, and the knowledge of their  
6 pleiotropic effects is currently advancing<sup>41</sup>. Lastly, the classification into different anti-diabetic  
7 medications is uncertain as these were self-reported and not prompted by interviewers. However,  
8 we consider it very unlikely that any misreporting would be confounded with serum PFAAs. This  
9 would tend to low specificity and thus bias of the association (if any) towards the null.  
10

11  
12  
13  
14  
15 On the other hand, strengths of this study include the fact that all showed estimates were adjusted  
16 for numerous potential confounders, including age in one-year age bands, making the effect of PFAA  
17 on memory impairment not likely to be confounded by lifestyle characteristics. Furthermore, these  
18 results are based on a very large population representative of the general population in West  
19 Virginia and Ohio<sup>25</sup>, thus estimates are solid; and the 21% prevalence of memory impairment is  
20 compatible and consistent with figures on prevalence of dementia reported for North America (Ferri  
21 et al, 2005).  
22  
23  
24  
25  
26

27 Individual serum levels reflect the contributions of both intake and retention/excretion rates. While  
28 we have no direct data on either of these components, the large differences in drinking water  
29 contamination and associated average population serum levels for PFOA in the 6 water districts,  
30 allow an estimate of the effect of exposure. That the association with PFOA was entirely within  
31 water districts, and not present at all between water districts despite large differences in (geometric)  
32 mean PFOA between districts (range 15.7 – 405.1) is suggestive of a bias operating at one or both of  
33 these levels. The between district estimate is not vulnerable to reverse causation or confounding at  
34 individual level, though some ecological confounding may operate if it happens to correlate with  
35 exposure level. Conversely the within district estimate but not between district estimate could  
36 reflect such individual confounding if present. Thus either the association documented at individual  
37 level could be confounded (e.g. by some unmeasured individual characteristic a common genetic  
38 variant related to both dementia risk and some excretion pathways); or that the association at the  
39 district level is confounded to obscure association biased towards the null (e.g. by confounding by  
40 for example socio-economic status). This sensitivity analysis cannot prove the presence of  
41 confounding at either level, but if the association had been consistent at both individual and district  
42 level that would have been more convincing of the association being due to PFAAs.  
43  
44  
45  
46  
47  
48  
49  
50  
51  
52

53 The size of the associations observed has both strong and weak aspects. The strong statistical  
54 significance suggests chance is an unlikely explanation. However, the odds ratios are only modestly  
55 different from one, 0.75 at the most extreme, so that biases are a more plausible explanation than  
56  
57  
58  
59  
60

1  
2  
3 they would be with more extreme ratios. In conclusion, these data show an inverse association  
4 between PFOA and PFOS exposure and self-reported memory-impairment, particularly in non  
5 diabetics. This can be potentially explained by preventive anti-inflammatory effect exerted by a  
6 PPAR agonist effect of these PFAAs, but confounding or even reverse causation cannot be excluded  
7 as an alternative explanation.  
8  
9  
10

#### 11 12 13 14 **ACKNOWLEDGMENTS**

15  
16 We are grateful to Dr Marc Weisskopf for his thoughtful comments on the draft of this manuscript,  
17 and for constructive idea sharing and discussions on this topic.  
18  
19  
20

21  
22  
23 **COMPETING INTERESTS:** The authors declare no competing financial interests  
24  
25  
26  
27  
28  
29  
30  
31  
32  
33  
34  
35  
36  
37  
38  
39  
40  
41  
42  
43  
44  
45  
46  
47  
48  
49  
50  
51  
52  
53  
54  
55  
56  
57  
58  
59  
60

## References

1. Kato K, Wong LY, Jia LT, Kuklennyk Z, Calafat AM. Trends in Exposure to Polyfluoroalkyl Chemicals in the U.S. Population: 1999-2008 (dagger). *Environ Sci Technol* 2011.
2. Tao L, Kannan K, Kajiwara N, Costa MM, Fillmann G, Takahashi S, et al. Perfluorooctanesulfonate and related fluorochemicals in albatrosses, elephant seals, penguins, and polar skuas from the Southern Ocean. *Environmental science & technology* 2006;40(24):7642-8.
3. Kim SK, Lee KT, Kang CS, Tao L, Kannan K, Kim KR, et al. Distribution of perfluorochemicals between sera and milk from the same mothers and implications for prenatal and postnatal exposures. *Environ Pollut* 2011;159(1):169-74.
4. Lau C, Anitole K, Hodes C, Lai D, Pfahles-Hutchens A, Seed J. Perfluoroalkyl acids: a review of monitoring and toxicological findings. *Toxicological sciences : an official journal of the Society of Toxicology* 2007;99(2):366-94.
5. D'Hollander W, de Voogt P, De Coen W, Bervoets L. Perfluorinated substances in human food and other sources of human exposure. *Reviews of environmental contamination and toxicology* 2010;208:179-215.
6. Goosey E, Harrad S. Perfluoroalkyl compounds in dust from Asian, Australian, European, and North American homes and UK cars, classrooms, and offices. *Environment international* 2011;37(1):86-92.
7. DeWitt JC, Shnyra A, Badr MZ, Loveless SE, Hoban D, Frame SR, et al. Immunotoxicity of perfluorooctanoic acid and perfluorooctane sulfonate and the role of peroxisome proliferator-activated receptor alpha. *Critical reviews in toxicology* 2009;39(1):76-94.
8. Peters JM, Gonzalez FJ. Why toxic equivalency factors are not suitable for perfluoroalkyl chemicals. *Chemical research in toxicology* 2011;24(10):1601-9.
9. Howroyd P, Swanson C, Dunn C, Cattley RC, Corton JC. Decreased longevity and enhancement of age-dependent lesions in mice lacking the nuclear receptor peroxisome proliferator-activated receptor alpha (PPARalpha). *Toxicologic pathology* 2004;32(5):591-9.
10. Capri M, Salvioli S, Sevini F, Valensin S, Celani L, Monti D, et al. The genetics of human longevity. *Annals of the New York Academy of Sciences* 2006;1067:252-63.
11. Paolisso G, Barbieri M, Rizzo MR, Carella C, Rotondi M, Bonafe M, et al. Low insulin resistance and preserved beta-cell function contribute to human longevity but are not associated with TH-INS genes. *Experimental gerontology* 2001;37(1):149-56.
12. Heneka MT, Feinstein DL, Galea E, Gleichmann M, Wullner U, Klockgether T. Peroxisome proliferator-activated receptor gamma agonists protect cerebellar granule cells from cytokine-induced apoptotic cell death by inhibition of inducible nitric oxide synthase. *Journal of neuroimmunology* 1999;100(1-2):156-68.
13. Heneka MT, Klockgether T, Feinstein DL. Peroxisome proliferator-activated receptor-gamma ligands reduce neuronal inducible nitric oxide synthase expression and cell death in vivo. *The Journal of neuroscience : the official journal of the Society for Neuroscience* 2000;20(18):6862-7.
14. Combs CK, Johnson DE, Karlo JC, Cannady SB, Landreth GE. Inflammatory mechanisms in Alzheimer's disease: inhibition of beta-amyloid-stimulated proinflammatory responses and neurotoxicity by PPARgamma agonists. *The Journal of neuroscience : the official journal of the Society for Neuroscience* 2000;20(2):558-67.
15. Kim EJ, Kwon KJ, Park JY, Lee SH, Moon CH, Baik EJ. Effects of peroxisome proliferator-activated receptor agonists on LPS-induced neuronal death in mixed cortical neurons: associated with iNOS and COX-2. *Brain research* 2002;941(1-2):1-10.
16. Luna-Medina R, Cortes-Canteli M, Alonso M, Santos A, Martinez A, Perez-Castillo A. Regulation of inflammatory response in neural cells in vitro by thiazolidinones derivatives through peroxisome proliferator-activated receptor gamma activation. *The Journal of biological chemistry* 2005;280(22):21453-62.

17. Whitehead JP. Diabetes: New conductors for the peroxisome proliferator-activated receptor gamma (PPARgamma) orchestra. *The international journal of biochemistry & cell biology* 2011;43(8):1071-4.
18. Takacs ML, Abbott BD. Activation of mouse and human peroxisome proliferator-activated receptors (alpha, beta/delta, gamma) by perfluorooctanoic acid and perfluorooctane sulfonate. *Toxicological sciences : an official journal of the Society of Toxicology* 2007;95(1):108-17.
19. Power MC, Webster TF, Baccarelli AA, Weisskopf MG. Cross-Sectional Association between Polyfluoroalkyl Chemicals and Cognitive Limitation in the National Health and Nutrition Examination Survey. *Neuroepidemiology* 2012;40(2):125-32.
20. McCrimmon RJ, Ryan CM, Frier BM. Diabetes and cognitive dysfunction. *Lancet* 2012;379(9833):2291-9.
21. MacNeil J, Steenland NK, Shankar A, Ducatman A. A cross-sectional analysis of type II diabetes in a community with exposure to perfluorooctanoic acid (PFOA). *Environmental research* 2009;109(8):997-1003.
22. Steenland K, Fletcher T, Savitz DA. Epidemiologic evidence on the health effects of perfluorooctanoic acid (PFOA). *Environmental health perspectives* 2010;118(8):1100-8.
23. Lin CY, Chen PC, Lin YC, Lin LY. Association among serum perfluoroalkyl chemicals, glucose homeostasis, and metabolic syndrome in adolescents and adults. *Diabetes care* 2009;32(4):702-7.
24. Lundin JI, Alexander BH, Olsen GW, Church TR. Ammonium perfluorooctanoate production and occupational mortality. *Epidemiology* 2009;20(6):921-8.
25. Frisbee SJ, Brooks AP, Jr., Maher A, Flensburg P, Arnold S, Fletcher T, et al. The C8 health project: design, methods, and participants. *Environmental health perspectives* 2009;117(12):1873-82.
26. Steenland K, Jin C, MacNeil J, Lally C, Ducatman AM, Vieira V, et al. Predictors of PFOA levels in community surrounding a chemical plant. *Environ Health Perspect* 2009;in press.
27. Kuklenyik Z, Reich JA, Tully JS, Needham LL, Calafat AM. Automated solid-phase extraction and measurement of perfluorinated organic acids and amides in human serum and milk. *Environmental science & technology* 2004;38(13):3698-704.
28. Gallo V, Egger M, McCormack V, Farmer PB, Ioannidis JP, Kirsch-Volders M, et al. Strengthening the Reporting of Observational studies in Epidemiology - Molecular Epidemiology (STROBE-ME): An Extension of the STROBE Statement. *PLoS Med* 2011;8(10):e1001117.
29. Gallo V, Leonardi G, Genser B, Lopez-Espinosa MJ, Frisbee SJ, Karlsson L, et al. Serum Perfluorooctanoate (PFOA) and Perfluorooctane Sulfonate (PFOS) Concentrations and Liver Function Biomarkers in a Population with Elevated PFOA Exposure. *Environ Health Perspect* 2012.
30. Lleo A, Galea E, Sastre M. Molecular targets of non-steroidal anti-inflammatory drugs in neurodegenerative diseases. *Cellular and molecular life sciences : CMLS* 2007;64(11):1403-18.
31. Alafuzoff I, Overmyer M, Helisalmi S, Soininen H. Lower Counts of Astroglia and Activated Microglia in Patients with Alzheimer's Disease with Regular Use of Non-Steroidal Anti-Inflammatory Drugs. *Journal of Alzheimer's disease : JAD* 2000;2(1):37-46.
32. Jimenez S, Baglietto-Vargas D, Caballero C, Moreno-Gonzalez I, Torres M, Sanchez-Varo R, et al. Inflammatory response in the hippocampus of PS1M146L/APP751SL mouse model of Alzheimer's disease: age-dependent switch in the microglial phenotype from alternative to classic. *The Journal of neuroscience : the official journal of the Society for Neuroscience* 2008;28(45):11650-61.
33. Revill P, Moral MA, Prous JR. Impaired insulin signaling and the pathogenesis of Alzheimer's disease. *Drugs Today (Barc)* 2006;42(12):785-90.
34. Anbalagan M, Huderson B, Murphy L, Rowan BG. Post-translational modifications of nuclear receptors and human disease. *Nucl Recept Signal* 2012;10:e001.

- 1  
2  
3 35. Choi JH, Banks AS, Estall JL, Kajimura S, Bostrom P, Laznik D, et al. Anti-diabetic drugs inhibit  
4 obesity-linked phosphorylation of PPARgamma by Cdk5. *Nature* 2010;466(7305):451-6.  
5 36. Hauser S, Adelmant G, Sarraf P, Wright HM, Mueller E, Spiegelman BM. Degradation of the  
6 peroxisome proliferator-activated receptor gamma is linked to ligand-dependent activation.  
7 *The Journal of biological chemistry* 2000;275(24):18527-33.  
8 37. Wolf CJ, Takacs ML, Schmid JE, Lau C, Abbott BD. Activation of mouse and human peroxisome  
9 proliferator-activated receptor alpha by perfluoroalkyl acids of different functional groups  
10 and chain lengths. *Toxicological sciences : an official journal of the Society of Toxicology*  
11 2008;106(1):162-71.  
12 38. Johansson N, Eriksson P, Viberg H. Neonatal exposure to PFOS and PFOA in mice results in  
13 changes in proteins which are important for neuronal growth and synaptogenesis in the  
14 developing brain. *Toxicological sciences : an official journal of the Society of Toxicology*  
15 2009;108(2):412-8.  
16 39. Johansson N, Fredriksson A, Eriksson P. Neonatal exposure to perfluorooctane sulfonate (PFOS)  
17 and perfluorooctanoic acid (PFOA) causes neurobehavioural defects in adult mice.  
18 *Neurotoxicology* 2008;29(1):160-9.  
19 40. Viberg H, Lee I, Eriksson P. Adult dose-dependent behavioral and cognitive disturbances after a  
20 single neonatal PFHxS dose. *Toxicology* 2013;304:185-91.  
21 41. Staels B, Fruchart JC. Therapeutic roles of peroxisome proliferator-activated receptor agonists.  
22 *Diabetes* 2005;54(8):2460-70.  
23  
24  
25  
26  
27  
28  
29  
30  
31  
32  
33  
34  
35  
36  
37  
38  
39  
40  
41  
42  
43  
44  
45  
46  
47  
48  
49  
50  
51  
52  
53  
54  
55  
56  
57  
58  
59  
60



Table 1: Participant Characteristics, Mid-Ohio Valley, 2005-2006 (N=21,024)

|                                     | All<br>N=21,024* | Memory impaired<br>N=4,462^ |
|-------------------------------------|------------------|-----------------------------|
| Males, n (%)                        | 10,353 (49.2)    | 2,040 (19.7)                |
| Females, n (%)                      | 10,671 (50.8)    | 2,422 (22.7)                |
| Age, median/mean (SD)               | 60.5/62.3 (9.0)  | 59.9/62.3 (9.4)             |
| <b>Age groups</b>                   |                  |                             |
| 50-54 years                         | 5,381 (25.6)     | 1,185 (22.0)                |
| 55-59 years                         | 4,831 (23.0)     | 1,055 (21.8)                |
| 60-64 years                         | 3,715 (17.7)     | 740 (19.9)                  |
| 65-69 years                         | 2,930 (13.9)     | 535 (18.3)                  |
| 70-74 years                         | 1,979 (9.4)      | 419 (21.2)                  |
| 75-79 years                         | 1,251 (6.0)      | 269 (21.5)                  |
| 80+ years                           | 937 (4.5)        | 259 (27.6)                  |
| Regular exercise, n (%)             | 6,774 (32.2)     | 1,306 (19.3)                |
| <b>BMI, n (%)</b>                   |                  |                             |
| Normal weight                       | 5,100 (24.3)     | 1,051 (20.6)                |
| Overweight                          | 8,194 (39.0)     | 1,612 (19.7)                |
| Obese class I                       | 4,789 (22.8)     | 1,028 (21.5)                |
| Obese class II                      | 1,805 (8.6)      | 457 (25.3)                  |
| Obese class III                     | 1,136 (5.4)      | 314 (27.6)                  |
| <b>Household income, \$/y n (%)</b> |                  |                             |
| ≤10,000                             | 1,486 (7.1)      | 448 (30.2)                  |
| 10,001-20,000                       | 3,059 (14.6)     | 757 (24.8)                  |
| 20,001-30,000                       | 3,281 (15.6)     | 751 (22.9)                  |
| 30,001-40,000                       | 2,936 (14.0)     | 572 (19.5)                  |
| 40,001-50,000                       | 2,135 (10.2)     | 422 (19.8)                  |
| 50,001-60,000                       | 1,815 (8.6)      | 359 (19.8)                  |
| 60,001-70,000                       | 1,367 (6.5)      | 268 (19.6)                  |
| >70,000                             | 2,882 (13.7)     | 480 (16.7)                  |
| Undetermined                        | 2,063 (9.8)      | 405 (19.6)                  |
| <b>Education, n (%)</b>             |                  |                             |
| < 12 years                          | 3,310 (15.7)     | 845 (25.5)                  |
| HS diploma or GED                   | 9,704 (46.2)     | 1,979 (20.4)                |
| Some college                        | 5,612 (26.7)     | 1,204 (21.5)                |
| Bachelor degree or higher           | 2,398 (11.4)     | 434 (18.1)                  |
| <b>Race, n (%)</b>                  |                  |                             |
| White                               | 20,514 (97.6)    | 4,349 (21.2)                |
| Black                               | 213 (1.0)        | 38 (17.8)                   |
| Other                               | 297 (1.4)        | 75 (25.3)                   |
| <b>Alcohol consumption, n (%)</b>   |                  |                             |
| None                                | 13,276 (63.2)    | 2,848 (21.5)                |
| < 1 drink/month                     | 2,589 (12.3)     | 597 (23.1)                  |
| < 1 drink/week                      | 1,530 (7.3)      | 309 (20.2)                  |
| Few drinks/week                     | 2,087 (9.9)      | 397 (19.0)                  |
| 1-3 drinks/day                      | 805 (3.8)        | 142 (17.6)                  |
| >3 drinks/day                       | 310 (1.5)        | 66 (21.3)                   |
| Undetermined                        | 427 (2.0)        | 103 (24.1)                  |
| <b>Smoking status, n (%)</b>        |                  |                             |
| Never smoker                        | 9,804 (46.6)     | 1,906 (19.4)                |
| Former smoker                       | 7,555 (35.8)     | 1,693 (22.5)                |
| Current smoker < 10 cig/day         | 1,212 (5.8)      | 256 (21.1)                  |
| Current smoker 10-19 cig/day        | 1,260 (6.0)      | 310 (24.6)                  |
| Current smoker 20+ cig/day          | 1,213 (5.8)      | 297 (24.5)                  |
| <b>Diabetes, n (%)</b>              |                  |                             |
| Thiazolidinedion use~               | 809 (23.5)       | 202 (25.0)                  |
| Other medications~                  | 1,244 (36.1)     | 321 (25.8)                  |
| No medication~                      | 1,390 (40.4)     | 352 (25.3)                  |

\*percentages refer to the proportion with respect to the entire population; ^percentages reflect the proportion of memory impaired in each category; percentages among diabetics only



Table 2: The association between PFAAs and self-report memory impairment in logistic regression for a doubling PFAA concentration, by quintiles of PFAAs, and in ordinal regression (n=21,024)

|                           | Range<br>(ng/mL) | Adjusted OR and 95% C.I.* |
|---------------------------|------------------|---------------------------|
| <b>PFOS</b>               |                  | 0.93 (0.90-0.96)          |
| 1 <sup>st</sup> quintile  | 0.25-14.4        | Ref.                      |
| 2 <sup>nd</sup> quintile  | 14.5-20.4        | 0.96 (0.87-1.07)          |
| 3 <sup>rd</sup> quintile  | 20.5-27.1        | 0.86 (0.78-0.96)          |
| 4 <sup>th</sup> quintile  | 27.2-37.2        | 0.87 (0.78-0.96)          |
| 5 <sup>th</sup> quintile  | 37.3-759.2       | 0.85 (0.76-0.94)          |
| <b>Trend</b>              |                  | <0.001                    |
| <b>Ordinal regression</b> |                  | 0.95 (0.93-0.98)          |
| <b>PFOA</b>               |                  | 0.96 (0.94-0.98)          |
| 1 <sup>st</sup> quintile  | 0.25-14.0        | Ref.                      |
| 2 <sup>nd</sup> quintile  | 14.1-27.0        | 0.88 (0.79-0.97)          |
| 3 <sup>rd</sup> quintile  | 27.1-53.8        | 0.83 (0.75-0.92)          |
| 4 <sup>th</sup> quintile  | 53.9-118.1       | 0.79 (0.71-0.88)          |
| 5 <sup>th</sup> quintile  | 118.3-22,412     | 0.79 (0.71-0.88)          |
| <b>Trend</b>              |                  | <0.001                    |
| <b>Ordinal regression</b> |                  | 0.97 (0.96-0.98)          |
| <b>PFNA</b>               |                  | 0.96 (0.91-1.00)          |
| 1 <sup>st</sup> quintile  | 0.25-0.90        | Ref.                      |
| 2 <sup>nd</sup> quintile  | 1.0-1.2          | 0.86 (0.78-0.96)          |
| 3 <sup>rd</sup> quintile  | 1.3-1.4          | 0.87 (0.77-0.98)          |
| 4 <sup>th</sup> quintile  | 1.5-1.9          | 0.86 (0.77-0.95)          |
| 5 <sup>th</sup> quintile  | 2.0-28.6         | 0.89 (0.80-0.99)          |
| <b>Trend</b>              |                  | 0.053                     |
| <b>Ordinal regression</b> |                  | 0.97 (0.94-1.01)          |
| <b>PFHxS</b>              |                  | 0.96 (0.93-0.99)          |
| 1 <sup>st</sup> quintile  | 0.25-1.7         | Ref.                      |
| 2 <sup>nd</sup> quintile  | 1.8-2.6          | 1.01 (0.91-1.12)          |
| 3 <sup>rd</sup> quintile  | 2.7-3.6          | 1.02 (0.91-1.13)          |
| 4 <sup>th</sup> quintile  | 3.7-5.6          | 0.93 (0.84-1.04)          |
| 5 <sup>th</sup> quintile  | 5.7-232.6        | 0.89(0.79-0.99)           |
| <b>Trend</b>              |                  | 0.009                     |
| <b>Ordinal regression</b> |                  | 0.97 (0.94-0.99)          |

\*Model adjusted for age (one-year age bands), ethnicity, gender, and school level (categorical), household income (categorical), physical activity, alcohol consumption (categorical, none/<1drink/month, < 1 drink/week, few drinks/week, 1-3 drinks/day, >3 drinks/day, undetermined), and cigarette smoking (categorical, never, former, < 10 cig/day, 12-20 cig/day, 20+ cig/day)

Table 3: The association between PFAAs and self-report memory impairment in logistic regression for a doubling PFAA concentration, by quintiles of distribution, and in ordinal regression by diabetes status (validated by clinical records)

|                                | Range (ng/mL)   | OR (95% CI)*       | p for inter | N               | OR (95% CI)*       | p for inter |
|--------------------------------|-----------------|--------------------|-------------|-----------------|--------------------|-------------|
|                                | <b>PFOS</b>     |                    |             | <b>PFOA</b>     |                    |             |
|                                | <b>N=17,832</b> |                    |             | <b>N=17,832</b> |                    |             |
| <b>Non-diabetics</b>           |                 | 0.93 (0.90-0.96)†  | -           |                 | 0.95 (0.93-0.97) † | -           |
| <b>Ordinal regression</b>      |                 | 0.96 (0.93-0.99)   |             |                 | 0.96 (0.95-0.98)   |             |
| <b>1<sup>st</sup> quintile</b> | 0.25-14.5       | Ref.               |             | 0.25-14.3       | Ref.               |             |
| <b>2<sup>nd</sup> quintile</b> | 14.6-20.5       | 0.96 (0.86-1.08)   |             | 14.4-27.2       | 0.85 (0.76-0.95)   |             |
| <b>3<sup>rd</sup> quintile</b> | 20.6-27.0       | 0.90 (0.80-1.01)   |             | 27.3-54.3       | 0.82 (0.73-0.92)   |             |
| <b>4<sup>th</sup> quintile</b> | 27.1-37.1       | 0.88 (0.78-0.99)   |             | 54.4-119.1      | 0.76 (0.68-0.86)   |             |
| <b>5<sup>th</sup> quintile</b> | 37.2-759.2      | 0.85 (0.76-0.96)   |             | 119.2-8,416     | 0.75 (0.67-0.84)   |             |
| <b>Trend</b>                   |                 | 0.002              |             |                 | <0.001             |             |
|                                | <b>N=3,192</b>  |                    |             | <b>N=3,192</b>  |                    |             |
| <b>Diabetics</b>               |                 | 0.94 (0.88-1.02) † | 0.698       |                 | 1.02 (0.97-1.06) † | 0.014       |
| <b>Ordinal regression</b>      |                 | 0.95 (0.90-1.01)   |             |                 | 1.00 (0.97-1.04)   |             |
| <b>1<sup>st</sup> quintile</b> | 0.25-13.6       | Ref.               |             | 0.25-12.6       | Ref.               |             |
| <b>2<sup>nd</sup> quintile</b> | 13.7-20.0       | 1.06 (0.82-1.36)   |             | 12.7-25.4       | 1.04 (0.80-1.34)   |             |
| <b>3<sup>rd</sup> quintile</b> | 20.1-27.3       | 0.82 (0.63-1.06)   |             | 25.5-48.0       | 0.88 (0.67-1.14)   |             |
| <b>4<sup>th</sup> quintile</b> | 27.4-37.3       | 0.87 (0.67-1.13)   |             | 48.1-102.1      | 1.04 (0.80-1.35)   |             |
| <b>5<sup>th</sup> quintile</b> | 37.4-272.0      | 0.90 (0.69-1.17)   |             | 102.4-22,412    | 1.09 (0.84-1.42)   |             |
| <b>Trend</b>                   |                 | 0.162              |             |                 | 0.543              |             |
|                                | <b>PFNA</b>     |                    |             | <b>PFHxS</b>    |                    |             |
|                                | <b>N=17,832</b> |                    |             | <b>N=17,832</b> |                    |             |
| <b>Non-diabetics</b>           |                 | 0.95 (0.90-0.99) † | -           |                 | 0.96 (0.93-0.99) † | -           |
| <b>Ordinal regression</b>      |                 | 0.97 (0.93-1.01)   |             |                 | 0.97 (0.94-0.99)   |             |
| <b>1<sup>st</sup> quintile</b> | 0.25-0.9        | Ref.               |             | 0.25-1.8        | Ref.               |             |
| <b>2<sup>nd</sup> quintile</b> | 1.0-1.2         | 0.86 (0.77-0.97)   |             | 1.9-2.6         | 0.98 (0.87-1.10)   |             |
| <b>3<sup>rd</sup> quintile</b> | 1.3-1.5         | 0.85 (0.76-0.95)   |             | 2.7-3.7         | 0.99 (0.89-1.11)   |             |
| <b>4<sup>th</sup> quintile</b> | 1.6-1.9         | 0.83 (0.73-0.93)   |             | 3.8-5.7         | 0.93 (0.82-1.05)   |             |
| <b>5<sup>th</sup> quintile</b> | 2.0-28.6        | 0.88 (0.78-0.99)   |             | 5.8-232.6       | 0.88 (0.79-0.99)   |             |
| <b>Trend</b>                   |                 | 0.031              |             |                 | 0.029              |             |
|                                | <b>N=3,192</b>  |                    |             | <b>N=3,192</b>  |                    |             |
| <b>Diabetics</b>               |                 | 1.01 (0.90-1.13) † | 0.259       | 3,192           | 0.99 (0.92-1.06) † | 0.683       |
| <b>Ordinal regression</b>      |                 | 0.99 (0.91-1.09)   |             |                 |                    |             |
| <b>1<sup>st</sup> quintile</b> | 0.25-0.8        | Ref.               |             | 0.25-1.6        | Ref.               |             |
| <b>2<sup>nd</sup> quintile</b> | 0.9-1.1         | 1.06 (0.80-1.40)   |             | 1.7-2.3         | 1.06 (0.81-1.38)   |             |
| <b>3<sup>rd</sup> quintile</b> | 1.2-1.4         | 0.88 (0.66-1.17)   |             | 2.4-3.2         | 1.10 (0.85-1.42)   |             |
| <b>4<sup>th</sup> quintile</b> | 1.5-1.8         | 1.03 (0.77-1.36)   |             | 3.3-5.0         | 1.02 (0.79-1.33)   |             |
| <b>5<sup>th</sup> quintile</b> | 1.9-14.5        | 1.08(0.82-1.43)    |             | 5.1-99.7        | 1.00 (0.77-1.31)   |             |
| <b>Trend</b>                   |                 | 0.620              |             |                 | 0.942              |             |

\*using clinical record validated diagnosis of diabetes and self-reported use of medications, adjusted for age (one-year age bands), ethnicity, gender, school level (categorical), household income (categorical), physical activity, alcohol consumption (categorical, none/<1drink/month, < 1 drink/week, few drinks/week, 1-3 drinks/day, >3 drinks/day, undetermined), and cigarette smoking (categorical, never, former, < 10 cig/day, 12-20 cig/day, 20+ cig/day); † OR for doubling PFAA concentration

Table 4: Sensitivity analysis of the association between PFAAs and self-report memory impairment for a doubling PFAA concentration, by quintiles of PFAAs, and in ordinal regression on subjects aged 65 years and older (n=7,097), and using any memory impairment as outcome measure (n=21,024).

|                                | Range (ng/mL) | OR (95% C.I.) <sup>b</sup><br>N=7,097<br>Restricted to those<br>aged 65+* | Range (ng/mL) | OR (95% C.I.) <sup>b</sup><br>N=21,024<br>Any memory<br>impairment <sup>^</sup> |
|--------------------------------|---------------|---------------------------------------------------------------------------|---------------|---------------------------------------------------------------------------------|
| <b>PFOS</b>                    |               | 0.95 (0.90-1.00)                                                          |               | 0.96 (0.94-0.99)                                                                |
| <b>Ordinal regression</b>      |               | 0.98 (0.94-1.03)                                                          |               |                                                                                 |
| <b>1<sup>st</sup> quintile</b> | 0.25-15.3     | Ref.                                                                      | 0.25-14.4     | Ref.                                                                            |
| <b>2<sup>nd</sup> quintile</b> | 15.4-22.0     | 0.99 (0.83-1.20)                                                          | 14.5-20.4     | 0.96 (0.88-1.05)                                                                |
| <b>3<sup>rd</sup> quintile</b> | 22.1-28.9     | 0.95 (0.79-1.14)                                                          | 20.5-27.1     | 0.90 (0.82-0.98)                                                                |
| <b>4<sup>th</sup> quintile</b> | 29.0-4.0      | 0.97 (0.81-1.16)                                                          | 27.2-37.2     | 0.94 (0.86-1.03)                                                                |
| <b>5<sup>th</sup> quintile</b> | 40.1-759.2    | 0.84 (0.70-1.01)                                                          | 37.3-759.2    | 0.93 (0.85-1.02)                                                                |
| <b>Trend</b>                   |               | 0.079                                                                     |               | 0.121                                                                           |
| <b>PFOA</b>                    |               | 0.99 (0.97-1.03)                                                          |               | 0.97 (0.96-0.99)                                                                |
| <b>Ordinal regression</b>      |               | 1.00 (0.97-1.03)                                                          |               |                                                                                 |
| <b>1<sup>st</sup> quintile</b> | 0.25-15.0     | Ref.                                                                      | 0.25-14.0     | Ref.                                                                            |
| <b>2<sup>nd</sup> quintile</b> | 15.1-29.6     | 0.91 (0.75-1.09)                                                          | 14.1-27.0     | 0.90 (0.82-0.98)                                                                |
| <b>3<sup>rd</sup> quintile</b> | 29.7-56.8     | 0.90 (0.75-1.08)                                                          | 27.1-53.8     | 0.86 (0.79-0.94)                                                                |
| <b>4<sup>th</sup> quintile</b> | 56.9-123.0    | 0.84 (0.70-1.01)                                                          | 53.9-118.1    | 0.87 (0.79-0.95)                                                                |
| <b>5<sup>th</sup> quintile</b> | 123.1-5,994.8 | 0.99(0.83-1.19)                                                           | 118.3-22,412  | 0.85 (0.78-0.93)                                                                |
| <b>Tend</b>                    |               | 0.680                                                                     |               | <0.001                                                                          |
| <b>PFNA</b>                    |               | 0.95 (0.87-1.02)                                                          |               | 0.98 (0.95-1.02)                                                                |
| <b>Ordinal regression</b>      |               | 0.99 (0.93-1.07)                                                          |               |                                                                                 |
| <b>1<sup>st</sup> quintile</b> | 0.25-0.8      | Ref.                                                                      | 0.25-0.90     | Ref.                                                                            |
| <b>2<sup>nd</sup> quintile</b> | 0.9-1.1       | 0.88 (0.73-1.06)                                                          | 1.0-1.2       | 0.89 (0.82-0.97)                                                                |
| <b>3<sup>rd</sup> quintile</b> | 1.2-1.4       | 0.81 (0.67-0.98)                                                          | 1.3-1.4       | 0.94(0.85-1.04)                                                                 |
| <b>4<sup>th</sup> quintile</b> | 1.5-1.8       | 0.82 (0.68-0.99)                                                          | 1.5-1.9       | 0.92 (0.85-1.01)                                                                |
| <b>5<sup>th</sup> quintile</b> | 1.9-11.7      | 0.88 (0.73-1.07)                                                          | 2.0-28.6      | 0.94 (0.86-1.03)                                                                |
| <b>Trend</b>                   |               | 0.177                                                                     |               | 0.493                                                                           |
| <b>PFHxS</b>                   |               | 0.96 (0.91-1.01)                                                          |               | 0.97 (0.94-0.99)                                                                |
| <b>Ordinal regression</b>      |               | 0.98 (0.93-1.02)                                                          |               |                                                                                 |
| <b>1<sup>st</sup> quintile</b> | 0.25-1.9      | Ref.                                                                      | 0.25-1.7      | Ref.                                                                            |
| <b>2<sup>nd</sup> quintile</b> | 2.0-2.8       | 0.98 (0.82-1.18)                                                          | 1.8-2.6       | 0.98 (0.90-1.07)                                                                |
| <b>3<sup>rd</sup> quintile</b> | 2.9-3.9       | 0.95 (0.79-1.15)                                                          | 2.7-3.6       | 1.03 (0.94-1.13)                                                                |
| <b>4<sup>th</sup> quintile</b> | 4.0-6.0       | 0.98 (0.82-1.17)                                                          | 3.7-5.6       | 0.96 (0.87-1.04)                                                                |
| <b>5<sup>th</sup> quintile</b> | 6.1-232.6     | 0.86 (0.71-1.03)                                                          | 5.7-232.6     | 0.89 (0.81-0.97)                                                                |
| <b>Trend</b>                   |               | 0.139                                                                     |               | 0.010                                                                           |

<sup>b</sup>Model 2 includes age (one-year age bands), ethnicity, gender, and school level (categorical), household income (categorical), physical activity, alcohol consumption (categorical, none/<1drink/month, < 1 drink/week, few drinks/week, 1-3 drinks/day, >3 drinks/day, undetermined), and cigarette smoking (categorical, never, former, < 10 cig/day, 12-20 cig/day, 20+ cig/day)

\* Sensitivity analysis including subjects aged 65 years or older only (N=7,097)

<sup>^</sup> Sensitivity analysis using a more restrictive definition of memory impairment (those reporting frequent episode of short-term memory loss only, cases = 1,115)
